# Supplementary material for: Iron(II)-catalyzed enantioselective meso-epoxide-opening with anilines
Source: Royal Society of Chemistry journal article supplement (doi:10.1039/c2cc18032d), 2012-01-01
Supplement: c2cc18032d.pdf [file c2cc18032d.pdf]

## Iron(II)-catalyzed enantioselective *meso*-epoxide-opening with anilines

Baptiste Plancq, Thierry Ollevier\*

Département de chimie, Université Laval, 1045 avenue de la Médecine, Québec (Québec)  
G1V 0A6, Canada

### Supporting Information

| Table of contents                                                                                      | Pages |
|--------------------------------------------------------------------------------------------------------|-------|
| Experimental                                                                                           | 1     |
| General procedure for the epoxide-opening reaction                                                     | 2     |
| Characterization data of the chiral amino alcohols                                                     | 2     |
| Crystallization of [Fe(ClO <sub>4</sub> ) <sub>2</sub> • <b>1</b> ]•(H <sub>2</sub> O)•2MeCN Complexes | 8     |
| References                                                                                             | 8     |
| <sup>1</sup> H, <sup>13</sup> C-NMR spectra and HPLC chromatograms                                     | 9     |

### Experimental

#### General

All reactions were performed in flame-dried 12x75 mm culture tubes under an atmosphere of nitrogen or argon. CH<sub>2</sub>Cl<sub>2</sub> was distilled from CaH<sub>2</sub>. Aniline derivatives were used as received and *meso*-epoxides were prepared by known procedures.<sup>1</sup> Iron(II) perchlorate was purchased from Alfa Aesar<sup>®</sup> (reagent grade purity) and Bolm's ligand **1** was synthesized according to known procedures.<sup>2</sup> <sup>1</sup>H and <sup>13</sup>C NMR spectra were recorded on a Varian Inova 400 MHz spectrometer in CDCl<sub>3</sub>. For <sup>1</sup>H NMR (400 MHz), tetramethylsilane (TMS) served as internal standard (δ = 0 ppm) and data are reported as follows: chemical shift (in ppm), multiplicity (s = singlet, d = doublet, t = triplet, q = quartet, m = multiplet, br = broad), coupling constant (in Hz), and integration. For <sup>13</sup>C NMR (100 MHz), CDCl<sub>3</sub> was used as internal standard (δ = 77.23 ppm) and spectra were obtained with complete proton decoupling. IR spectra were recorded on a BOMEM Arid-Zone<sup>™</sup> FT-IR spectrometer or a NICOLET 380 FT-IR spectrometer with ZnSe ATR accessory and are reported in reciprocal centimeter (cm<sup>-1</sup>). High-resolution mass spectra (HRMS) were recorded on an Agilent 6210 ESI TOF (time of flight) mass spectrometer. Melting points (m.p.) are uncorrected and were recorded on a MEL-TEMP<sup>®</sup> melting point apparatus. Flash column chromatography<sup>3</sup> was performed on silica gel (230–400 mesh) and analytical thin-layer chromatography was carried out using 250 μm commercial silica gel plates. Visualization of the developed chromatogram was performed by UV absorbance and/or aqueous potassium permanganate.

*Caution: Perchlorate salts can be explosive and should be handled with care. Conversion to lower hydrates by unintentional dehydration may cause explosion. Use due caution in handling, as for all perchlorates.*<sup>4</sup>

### General procedure for the *meso*-epoxide opening reaction with aniline derivatives

A mixture of  $\text{Fe}(\text{ClO}_4)_2 \cdot 6\text{H}_2\text{O}$  (9.1 mg, 0.025 mmol) and Bolm's ligand **1** (9.9 mg, 0.030 mmol) in distilled  $\text{CH}_2\text{Cl}_2$  (0.5 mL) was stirred at room temperature for 1 h. The epoxide (0.5 mmol) and the aniline derivative (0.5 mmol) were then subsequently added to the mixture. The reaction mixture was stirred at room temperature until the starting materials disappeared (monitored by TLC). The reaction was quenched with 5 mL saturated aqueous  $\text{NaHCO}_3$ . The resulting mixture was extracted with ether (3x10 mL), and the combined organic layers were dried over anhydrous  $\text{MgSO}_4$ . The solvents were evaporated under reduced pressure (rotary evaporator), and the residue was purified by column chromatography (hexane/ethyl acetate) to give the desired amino alcohol. The enantiomeric excess of the product was determined by chiral HPLC analysis.

### Characterization data of the chiral amino alcohols

#### (1*S*,2*S*)-1,2-Diphenyl-2-(phenylamino)ethanol (Table 2, entry 1)<sup>5</sup>

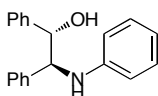

According to the general procedure with 98.1 mg *cis*-stilbene oxide and 45.6  $\mu\text{L}$  aniline, the product was isolated as a white solid (m.p. = 85–86 °C). Reaction time = 16 h.  $R_f$  = 0.43 (20% EtOAc in hexanes).  $^1\text{H}$  NMR ( $\text{CDCl}_3$ , 400 MHz)  $\delta$ : 7.32–7.20 (m, 10H), 7.10–7.03 (m, 2H), 6.69–6.63 (m, 1H), 6.57–6.51 (m, 2H), 4.89 (dd,  $J$  = 5.8, 2.5 Hz, 1H), 4.68 (brs, 1H), 4.54 (d,  $J$  = 5.8 Hz, 1H), 2.50 (d,  $J$  = 2.5 Hz, 1H).  $^{13}\text{C}$  NMR ( $\text{CDCl}_3$ , 100 MHz)  $\delta$ : 147.6, 140.9, 140.5, 129.4, 128.8, 128.5, 128.2, 127.8, 127.6, 126.9, 118.2, 114.5, 78.4, 65.1. IR (neat): 3408, 3046, 3028, 2874, 2831, 1601, 1504, 1455, 1429, 1318, 1265, 1041, 753, 701, 694  $\text{cm}^{-1}$ .  $[\alpha]_D^{24}$  –51.4 ( $c$  = 0.53,  $\text{CH}_2\text{Cl}_2$ , 95% ee). HPLC (Daicel Chiralcel<sup>®</sup> OD-H, hexane/*i*-PrOH = 90/10, flow rate = 1.0 mL/min)  $t_R$  = 13.4 min (minor),  $t_R$  = 17.5 min (major).

#### (1*S*,2*S*)-1,2-Diphenyl-2-(*o*-tolylamino)ethanol (Table 2, entry 2)<sup>5</sup>

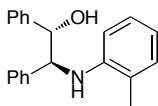

According to the general procedure with 98.1 mg *cis*-stilbene oxide and 53.4  $\mu\text{L}$  *o*-toluidine, the product was isolated as a white pasty solid (foam). Reaction time = 72 h.  $R_f$  = 0.49 (20% EtOAc in hexanes).  $^1\text{H}$  NMR ( $\text{CDCl}_3$ , 400 MHz)  $\delta$ : 7.35–7.21 (m, 10H), 7.02 (d,  $J$  = 7.4 Hz, 1H), 6.93–6.87 (m, 1H), 6.62–6.56 (m, 1H), 6.29 (d,  $J$  = 8.0 Hz, 1H), 4.97 (dd,  $J$  = 5.2, 2.2 Hz, 1H), 4.60 (brs, 1H), 4.58 (d,  $J$  = 5.2 Hz, 1H), 2.40 (d,  $J$  = 2.2

Hz, 1H), 2.21 (s, 3H).  $^{13}\text{C}$  NMR ( $\text{CDCl}_3$ , 100 MHz)  $\delta$ : 145.5, 141.0, 140.6, 130.3, 128.9, 128.6, 128.2, 127.8, 127.5, 127.2, 126.8, 123.1, 117.6, 111.8, 78.4, 64.8, 17.9. IR (neat): 3420, 3061, 3029, 2888, 2855, 1607, 1587, 1508, 1453, 1316, 1266, 1048, 749, 700  $\text{cm}^{-1}$ . HPLC (Daicel Chiralpak<sup>®</sup> AD-H, hexane/*i*-PrOH = 80/20, flow rate = 0.5 mL/min)  $t_{\text{R}}$  = 10.8 min (minor),  $t_{\text{R}}$  = 14.2 min (major).

**(1*S*,2*S*)-2-(2-Methoxyphenylamino)-1,2-diphenylethanol (Table 2, entry 3)<sup>5</sup>**

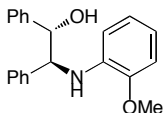

According to the general procedure with 98.1 mg *cis*-stilbene oxide and 56.4  $\mu\text{L}$  *o*-anisidine, the product was isolated as a white pasty solid (foam). Reaction time = 72 h. Rf = 0.44 (20% EtOAc in hexanes).  $^1\text{H}$  NMR ( $\text{CDCl}_3$ , 400 MHz)  $\delta$ : 7.30–7.15 (m, 10H), 6.75 (dd,  $J$  = 7.6, 1.4 Hz, 1H), 6.70–6.59 (m, 2H), 6.40 (dd,  $J$  = 7.6, 1.4 Hz, 1H), 5.27 (brs, 1H), 4.89 (dd,  $J$  = 6.3, 2.0 Hz, 1H), 4.52 (d,  $J$  = 6.3 Hz, 1H), 3.88 (s, 3H), 2.72 (d,  $J$  = 2.0 Hz, 1H).  $^{13}\text{C}$  NMR ( $\text{CDCl}_3$ , 100 MHz)  $\delta$ : 147.7, 141.0, 140.5, 137.5, 128.7, 128.4, 128.1, 127.7, 127.6, 127.1, 121.4, 117.5, 112.1, 109.9, 78.6, 65.2, 55.9. IR (neat): 3401, 3062, 3029, 2937, 2833, 1602, 1511, 1454, 1429, 1343, 1248, 1225, 1176, 1125, 1049, 1028, 910, 769, 737, 700  $\text{cm}^{-1}$ . HPLC (Daicel Chiralpak<sup>®</sup> AD-H, hexane/*i*-PrOH = 95/5, flow rate = 1.0 mL/min)  $t_{\text{R}}$  = 23.2 min (minor),  $t_{\text{R}}$  = 28.3 min (major).

**(1*S*,2*S*)-2-(4-Chlorophenylamino)-1,2-diphenylethanol (Table 2, entry 4)<sup>5</sup>**

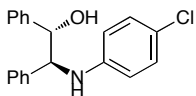

According to the general procedure with 98.1 mg *cis*-stilbene oxide and 63.8 mg 4-chloroaniline, the product was isolated as a pale yellow pasty solid (foam). Reaction time = 16 h. Rf = 0.42 (20% EtOAc in hexanes).  $^1\text{H}$  NMR ( $\text{CDCl}_3$ , 400 MHz)  $\delta$ : 7.33–7.18 (m, 10H), 7.02–6.96 (m, 2H), 6.45–6.40 (m, 2H), 4.89 (dd,  $J$  = 5.6, 2.6 Hz, 1H), 4.75 (brs, 1H), 4.49 (d,  $J$  = 5.6 Hz, 1H), 2.38 (d,  $J$  = 2.6 Hz, 1H).  $^{13}\text{C}$  NMR ( $\text{CDCl}_3$ , 100 MHz)  $\delta$ : 146.2, 140.7, 140.1, 129.2, 128.9, 128.6, 128.3, 127.9, 127.5, 126.8, 122.7, 115.5, 78.3, 65.0. IR (neat): 3403, 3061, 3029, 2882, 1598, 1497, 1453, 1400, 1316, 1295, 1260, 1177, 1090, 1050, 816, 768, 700  $\text{cm}^{-1}$ . HPLC (Daicel Chiralpak<sup>®</sup> AD-H, hexane/*i*-PrOH = 90/10, flow rate = 1.0 mL/min)  $t_{\text{R}}$  = 15.0 min (major),  $t_{\text{R}}$  = 18.0 min (minor).

**(1*S*,2*S*)-2-(2-Chlorophenylamino)-1,2-diphenylethanol (Table 2, entry 5)<sup>6</sup>**

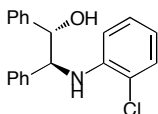

According to the general procedure with 98.1 mg *cis*-stilbene oxide and 52.6  $\mu\text{L}$  2-chloroaniline, the product was isolated as a white pasty solid (foam). Reaction time = 48 h. Rf = 0.54 (20% EtOAc in hexanes).  $^1\text{H}$  NMR ( $\text{CDCl}_3$ , 400 MHz)  $\delta$ : 7.35–7.22 (m, 10H), 7.22 (dd,  $J$  = 8.0, 1.6 Hz, 1H), 6.93–6.87 (m, 1H), 6.58–6.53 (m, 1H), 6.35 (dd,  $J$  =

8.2, 1.6 Hz, 1H), 5.45 (d,  $J = 5.5$  Hz, 1H), 4.97 (dd,  $J = 5.5, 2.7$  Hz, 1H), 4.58 (dd,  $J = 5.5, 5.5$  Hz, 1H), 2.36 (d,  $J = 2.7$  Hz, 1H).  $^{13}\text{C}$  NMR ( $\text{CDCl}_3$ , 100 MHz)  $\delta$ : 143.4, 140.8, 140.0, 129.3, 128.9, 128.6, 128.3, 128.0, 127.8, 127.5, 126.8, 120.2, 117.9, 113.1, 78.3, 64.6. IR (neat): 3403, 3062, 3030, 2884, 1597, 1503, 1453, 1432, 1323, 1052, 1033, 769, 742, 700  $\text{cm}^{-1}$ . HPLC (Daicel Chiralpak<sup>®</sup> AD-H, hexane/*i*-PrOH = 95/5, flow rate = 0.8 mL/min)  $t_{\text{R}} = 19.2$  min (minor),  $t_{\text{R}} = 22.4$  min (major).

#### (1*S*,2*S*)-2-(4-Bromophenylamino)-1,2-diphenylethanol (Table 2, entry 6)<sup>5</sup>

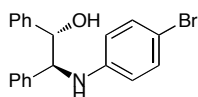

According to the general procedure with 98.1 mg *cis*-stilbene oxide and 86.0 mg 4-bromoaniline, the product was isolated as a pale yellow pasty solid (foam). Reaction time = 16 h. Rf = 0.37 (20% EtOAc in hexanes).  $^1\text{H}$  NMR ( $\text{CDCl}_3$ , 400 MHz)  $\delta$ : 7.33–7.19 (m, 10H), 7.15–7.10 (m, 2H), 6.41–6.36 (m, 2H), 4.89 (dd,  $J = 5.5, 2.8$  Hz, 1H), 4.76 (brs, 1H), 4.49 (d,  $J = 5.5$  Hz, 1H), 2.34 (d,  $J = 2.8$  Hz, 1H).  $^{13}\text{C}$  NMR ( $\text{CDCl}_3$ , 100 MHz)  $\delta$ : 146.6, 140.7, 140.0, 132.0, 128.9, 128.6, 128.3, 128.0, 127.5, 126.8, 115.9, 109.8, 78.2, 64.8. IR (neat): 3406, 3062, 3028, 2882, 1593, 1494, 1453, 1396, 1316, 1295, 1260, 1179, 1073, 1051, 814, 768, 700  $\text{cm}^{-1}$ . HPLC (Daicel Chiralpak<sup>®</sup> AD-H, hexane/*i*-PrOH = 80/20, flow rate = 0.5 mL/min)  $t_{\text{R}} = 18.5$  min (major),  $t_{\text{R}} = 22.9$  min (minor).

#### (1*S*,2*S*)-1,2-Diphenyl-2-(4-(trifluoromethyl)phenylamino)ethanol (Table 2, entry 7)

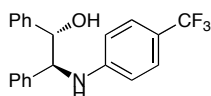

According to the general procedure with 98.1 mg *cis*-stilbene oxide and 62.8  $\mu\text{L}$  4-(trifluoromethyl)aniline, the product was isolated as a pale yellow pasty solid (foam). Reaction time = 24 h. Rf = 0.34 (20% EtOAc in hexanes).  $^1\text{H}$  NMR ( $\text{CDCl}_3$ , 400 MHz)  $\delta$ : 7.36–7.22 (m, 12H), 6.50 (d,  $J = 8.6$  Hz, 2H), 5.11 (d,  $J = 5.1$  Hz, 1H), 4.94 (d,  $J = 5.1$  Hz, 1H), 4.59 (dd,  $J = 5.1, 5.1$  Hz, 1H), 2.25 (brs, 1H).  $^{13}\text{C}$  NMR ( $\text{CDCl}_3$ , 100 MHz)  $\delta$ : 150.1, 140.6, 139.8, 129.0, 128.7, 128.4, 128.1, 127.5, 126.7 (q,  $J = 3.8$  Hz), 125.3 (q,  $J = 270.8$  Hz), 119.4 (q,  $J = 32.6$  Hz), 113.4, 78.1, 64.2. IR (neat): 3414, 3064, 3032, 2888, 1618, 1532, 1491, 1454, 1327, 1274, 1188, 1163, 1110, 1064, 826, 769, 701  $\text{cm}^{-1}$ . HRMS (ESI-TOF) calcd for  $\text{C}_{21}\text{H}_{19}\text{F}_3\text{NO}^+$  ( $[\text{M}+\text{H}]^+$ ): 358.1413, found: 358.1411. HPLC (Daicel Chiralpak<sup>®</sup> AD-H, hexane/*i*-PrOH = 80/20, flow rate = 0.5 mL/min)  $t_{\text{R}} = 15.6$  min (major),  $t_{\text{R}} = 24.9$  min (minor).

#### (1*S*,2*S*)-2-(4-Cyanophenylamino)-1,2-diphenylethanol (Table 2, entry 8)

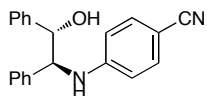

According to the general procedure with 98.1 mg *cis*-stilbene oxide and 59.1 mg 4-cyanoaniline, the product was isolated as a white pasty solid (foam). Reaction time = 24 h. Rf = 0.12 (20% EtOAc in hexanes).  $^1\text{H}$  NMR ( $\text{CDCl}_3$ , 400 MHz)  $\delta$ : 7.36–7.22 (m,

12H), 6.44 (d,  $J = 8.4$  Hz, 2H), 5.33 (d,  $J = 5.4$  Hz, 1H), 4.95 (dd,  $J = 5.4, 2.9$  Hz, 1H), 4.58 (dd,  $J = 5.4, 5.4$  Hz, 1H), 2.26 (d,  $J = 2.9$  Hz, 1H).  $^{13}\text{C}$  NMR ( $\text{CDCl}_3$ , 100 MHz)  $\delta$ : 151.0, 140.7, 139.5, 133.7, 129.0, 128.7, 128.4, 128.1, 127.4, 126.6, 120.8, 113.6, 98.9, 77.9, 63.9. IR (neat): 3426, 3061, 3030, 2883, 2214, 1607, 1521, 1453, 1339, 1274, 1175, 1054, 826, 700  $\text{cm}^{-1}$ . HRMS (ESI-TOF) calcd for  $\text{C}_{21}\text{H}_{19}\text{N}_2\text{O}^+$  ( $[\text{M}+\text{H}]^+$ ): 315.1492, found: 315.1486. HPLC (Daicel Chiralpak<sup>®</sup> AD-H, hexane/*i*-PrOH = 70/30, flow rate = 0.5 mL/min)  $t_{\text{R}} = 17.2$  min (major),  $t_{\text{R}} = 21.9$  min (minor).

### (1*S*,2*S*)-2-(2,6-Dimethylphenylamino)-1,2-diphenylethanol (Table 2, entry 9)

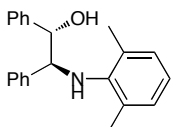

According to the general procedure with 98.1 mg *cis*-stilbene oxide and 61.8  $\mu\text{L}$  2,6-dimethylaniline, the product was isolated as a colorless oil. Reaction time = 72 h. Rf = 0.54 (20% EtOAc in hexanes).  $^1\text{H}$  NMR ( $\text{CDCl}_3$ , 400 MHz)  $\delta$ : 7.29–7.24 (m, 2H), 7.24–7.14 (m, 6H), 7.06–7.01 (m, 2H), 6.90 (d,  $J = 7.3$  Hz, 2H), 6.77 (t,  $J = 7.3$  Hz, 1H), 5.07 (d,  $J = 8.6$  Hz, 1H), 4.24 (d,  $J = 8.6$  Hz, 1H), 2.14 (s, 6H).  $^{13}\text{C}$  NMR ( $\text{CDCl}_3$ , 100 MHz)  $\delta$ : 143.8, 141.1, 140.8, 129.6, 129.5, 128.6, 128.3, 128.0, 127.9, 127.2, 122.5, 76.9, 69.2, 19.5. IR (neat): 3403, 3062, 3031, 2950, 2925, 2859, 1594, 1492, 1475, 1454, 1396, 1256, 1211, 1190, 1099, 1056, 1027, 910, 869, 768, 733, 699  $\text{cm}^{-1}$ . HRMS (ESI-TOF) calcd for  $\text{C}_{22}\text{H}_{24}\text{NO}^+$  ( $[\text{M}+\text{H}]^+$ ): 318.1852, found: 318.1857. HPLC (Daicel Chiralpak<sup>®</sup> AD-H, hexane/*i*-PrOH = 90/10, flow rate = 1.0 mL/min)  $t_{\text{R}} = 7.9$  min (major),  $t_{\text{R}} = 25.5$  min (minor).

### (1*S*,2*S*)-2-(*N*-Methyl-*N*-phenylamino)-1,2-diphenylethanol (Table 2, entry 10)<sup>7</sup>

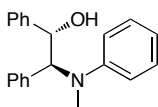

According to the general procedure with 98.1 mg *cis*-stilbene oxide and 54.2  $\mu\text{L}$  *N*-methylaniline, the product was isolated as a colorless oil. Reaction time = 24 h. Rf = 0.52 (20% EtOAc in hexanes).  $^1\text{H}$  NMR ( $\text{CDCl}_3$ , 400 MHz)  $\delta$ : 7.43–7.38 (m, 2H), 7.33–7.12 (m, 8H), 7.05–6.97 (m, 4H), 6.96–6.91 (m, 1H), 5.30 (d,  $J = 10.0$  Hz, 1H), 4.88 (d,  $J = 10.0$  Hz, 1H), 3.98 (s, 1H), 2.72 (s, 3H).  $^{13}\text{C}$  NMR ( $\text{CDCl}_3$ , 100 MHz)  $\delta$ : 151.7, 141.1, 135.2, 129.5, 129.1, 128.6, 128.4, 128.2, 128.1, 128.0, 120.6, 117.9, 73.9, 71.9, 33.1. IR (neat): 3418, 3061, 3030, 2953, 2885, 2811, 1598, 1500, 1452, 1385, 1320, 1191, 1081, 1056, 1031, 911, 756, 736, 697  $\text{cm}^{-1}$ . HPLC (Daicel Chiralpak<sup>®</sup> AS-H, hexane/*i*-PrOH = 95/5, flow rate = 0.8 mL/min)  $t_{\text{R}} = 14.7$  min (minor),  $t_{\text{R}} = 20.7$  min (major).

**(1*S*,2*S*)-2-(Naphthalen-2-ylamino)-1,2-diphenylethanol (Table 2, entry 11)**

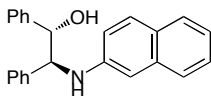

According to the general procedure with 98.1 mg *cis*-stilbene oxide and 71.6 mg 2-naphthylamine, the product was isolated as a pale orange pasty solid (foam). Reaction time = 16 h. Rf = 0.38 (20% EtOAc in hexanes). <sup>1</sup>H NMR (CDCl<sub>3</sub>, 400 MHz) δ: 7.62 (d, *J* = 8.0 Hz, 1H), 7.58 (d, *J* = 8.8 Hz, 1H), 7.44 (d, *J* = 8.0 Hz, 1H), 7.36–7.20 (m, 11H), 7.18–7.12 (m, 1H), 6.93 (dd, *J* = 9.0, 2.4 Hz, 1H), 6.62 (d, *J* = 2.4 Hz, 1H), 4.96 (d, *J* = 5.6, 1H), 4.88 (brs, 1H), 4.69 (d, *J* = 5.6 Hz, 1H), 2.47 (brs, 1H). <sup>13</sup>C NMR (CDCl<sub>3</sub>, 100 MHz) δ: 145.2, 140.9, 140.3, 135.2, 129.1, 128.9, 128.6, 128.3, 128.0, 127.9, 127.6, 127.0, 126.5, 126.4, 122.5, 118.8, 106.9, 78.3, 64.9. IR (neat): 3403, 3059, 3028, 2885, 1630, 1602, 1521, 1483, 1453, 1396, 1359, 1274, 1228, 1190, 1051, 1019, 832, 747, 700 cm<sup>-1</sup>. HRMS (ESI-TOF) calcd for C<sub>24</sub>H<sub>22</sub>NO<sup>+</sup> ([M+H]<sup>+</sup>): 340.1696, found: 340.1701. HPLC (Daicel Chiralcel<sup>®</sup> OD-H, hexane/*i*-PrOH = 90/10, flow rate = 1.0 mL/min) *t*<sub>R</sub> = 30.6 min (minor), *t*<sub>R</sub> = 33.8 min (major).

**(1*S*,2*S*)-2-(Naphthalen-1-ylamino)-1,2-diphenylethanol (Table 2, entry 12)<sup>5</sup>**

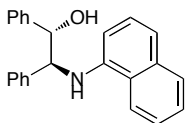

According to the general procedure with 98.1 mg *cis*-stilbene oxide and 71.6 mg 1-naphthylamine, the product was isolated as a pale pink pasty solid (foam). Reaction time = 16 h. Rf = 0.47 (20% EtOAc in hexanes). <sup>1</sup>H NMR (CDCl<sub>3</sub>, 400 MHz) δ: 8.02–7.97 (m, 1H), 7.79–7.74 (m, 1H), 7.53–7.43 (m, 2H), 7.40–7.21 (m, 10H), 7.20–7.08 (m, 2H), 6.30 (d, *J* = 7.2 Hz, 1H), 5.55 (brs, 1H), 5.05 (dd, *J* = 5.4, 2.8 Hz, 1H), 4.73 (d, *J* = 5.4 Hz, 1H), 2.46 (d, *J* = 2.8 Hz, 1H). <sup>13</sup>C NMR (CDCl<sub>3</sub>, 100 MHz) δ: 142.5, 141.0, 140.3, 134.6, 129.0, 128.9, 128.7, 128.3, 127.9, 127.6, 126.9, 126.8, 126.1, 125.2, 124.3, 120.4, 118.1, 107.0, 78.6, 64.8. IR (neat): 3423, 3060, 3030, 2886, 1582, 1526, 1479, 1454, 1409, 1345, 1281, 1051, 768, 700 cm<sup>-1</sup>. HPLC (Daicel Chiralcel<sup>®</sup> OD-H, hexane/*i*-PrOH = 80/20, flow rate = 1.0 mL/min) *t*<sub>R</sub> = 10.2 min (minor), *t*<sub>R</sub> = 18.7 min (major).

**(1*S*,2*S*)-2-(4-Bromonaphthalen-1-ylamino)-1,2-diphenylethanol (Table 2, entry 13)<sup>7</sup>**

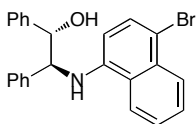

According to the general procedure with 98.1 mg *cis*-stilbene oxide and 111.0 mg 1-amino-4-bromonaphthalene, the product was isolated as a pale grey pasty solid (foam). Reaction time = 16 h. Rf = 0.40 (20% EtOAc in hexanes). <sup>1</sup>H NMR (CDCl<sub>3</sub>, 400 MHz) δ: 8.19–8.15 (m, 1H), 8.02–7.97 (m, 1H), 7.61–7.52 (m, 2H), 7.40–7.20 (m, 11H), 6.13 (d, *J* = 8.2 Hz, 1H), 5.64 (brs, 1H), 5.05 (dd, *J* = 5.2, 3.0 Hz, 1H), 4.68 (d, *J* = 5.2 Hz, 1H), 2.35 (d, *J* = 3.0 Hz, 1H). <sup>13</sup>C NMR (CDCl<sub>3</sub>, 100 MHz) δ: 142.5, 140.8, 139.7, 132.5,

130.5, 129.0, 128.7, 128.5, 128.2, 128.1, 127.5, 127.4, 126.9, 125.9, 125.6, 120.9, 110.7, 107.6, 78.5, 64.7. IR (neat): 3424, 3063, 3029, 2886, 1590, 1570, 1523, 1476, 1453, 1381, 1339, 1268, 1053, 916, 769, 752, 700  $\text{cm}^{-1}$ . HPLC (Daicel Chiralcel<sup>®</sup> OD-H, hexane/*i*-PrOH = 90/10, flow rate = 1.0 mL/min)  $t_R$  = 15.3 min (minor),  $t_R$  = 20.4 min (major).

**(1*S*,2*S*)-1,2-bis(4-chlorophenyl)-2-(phenylamino)ethanol (Table 3, entry 1)<sup>8</sup>**

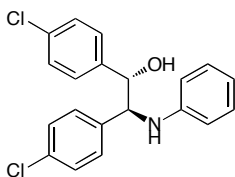

According to the general procedure with 132.6 mg *cis*-1,2-bis-(*p*-chlorophenyl)ethane oxide and 45.6  $\mu\text{L}$  aniline, the product was isolated as a pale yellow pasty solid (foam). Reaction time = 72 h.  $R_f$  = 0.39 (20% EtOAc in hexanes). <sup>1</sup>H NMR ( $\text{CDCl}_3$ , 400 MHz)  $\delta$ : 7.29–7.21 (m, 4H), 7.19–7.05 (m, 6H), 6.72–6.66 (m, 1H), 6.54–6.49 (m, 2H), 4.80 (dd,  $J$  = 6.2, 2.4 Hz, 1H), 4.63 (brs, 1H), 4.45 (d,  $J$  = 6.2 Hz, 1H), 2.53 (d,  $J$  = 2.4 Hz, 1H). <sup>13</sup>C NMR ( $\text{CDCl}_3$ , 100 MHz)  $\delta$ : 147.0, 139.0, 138.6, 134.1, 133.6, 129.4, 129.0, 128.9, 128.7, 128.3, 118.7, 114.5, 77.6, 64.6. IR (neat): 3403, 3052, 3025, 2885, 1602, 1503, 1491, 1431, 1409, 1315, 1263, 1092, 1053, 1013, 835, 752, 692  $\text{cm}^{-1}$ . HPLC (Daicel Chiralcel<sup>®</sup> OD-H, hexane/*i*-PrOH = 90/10, flow rate = 1.0 mL/min)  $t_R$  = 20.5 min (minor),  $t_R$  = 31.1 min (major).

**(1*S*,2*S*)-1,2-di(naphthalen-2-yl)-2-(phenylamino)ethanol (Table 3, entry 2)<sup>5</sup>**

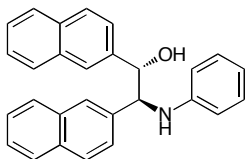

According to the general procedure with 148.2 mg *cis*-1,2-bis-(2'-naphthyl)ethane oxide and 45.6  $\mu\text{L}$  aniline, the product was isolated as a white solid (m.p. = 150–151 °C). Reaction time = 36 h.  $R_f$  = 0.36 (20% EtOAc in hexanes). <sup>1</sup>H NMR ( $\text{CDCl}_3$ , 400 MHz)  $\delta$ : 7.86–7.70 (m, 8H), 7.50–7.42 (m, 4H), 7.42–7.36 (m, 2H), 7.07–7.01 (m, 2H), 6.66–6.61 (m, 1H), 6.59–6.53 (m, 2H), 5.18 (d,  $J$  = 5.6 Hz, 1H), 4.83 (d,  $J$  = 5.6 Hz, 1H), 4.82 (brs, 1H), 2.61 (brs, 1H). <sup>13</sup>C NMR ( $\text{CDCl}_3$ , 100 MHz)  $\delta$ : 147.5, 138.3, 138.1, 133.7, 133.4, 133.3, 133.2, 129.4, 128.7, 128.4, 128.3, 128.0, 126.6, 126.5, 126.4, 126.3, 126.2, 125.9, 125.6, 124.7, 118.3, 114.5, 78.2, 65.0. IR (neat): 3551, 3421, 3050, 3019, 2883, 1602, 1506, 1428, 1359, 1302, 1128, 1058, 857, 826, 752, 690  $\text{cm}^{-1}$ . HPLC (Daicel Chiralcel<sup>®</sup> OD-H, hexane/*i*-PrOH = 80/20, flow rate = 1.0 mL/min)  $t_R$  = 22.3 min (minor),  $t_R$  = 31.0 min (major).



## Crystallization of $[\text{Fe}(\text{ClO}_4)_2 \cdot \mathbf{1}] \cdot (\text{H}_2\text{O}) \cdot 2\text{MeCN}$ complexes

Crystallization of  $[\text{Fe}(\text{ClO}_4)_2 \cdot \mathbf{1}] \cdot (\text{H}_2\text{O}) \cdot 2\text{MeCN}$  was carried out as follows: A mixture of  $\text{Fe}(\text{ClO}_4)_2 \cdot 6\text{H}_2\text{O}$  (5.4 mg, 15.0  $\mu\text{mol}$ ) and Bolm's ligand **1** (4.9 mg, 15.0  $\mu\text{mol}$ ) was dissolved in MeCN (0.2 mL). This solution was stirred at room temperature for 30 min. Vapor diffusion of diethyl ether into this solution afforded the crystals.

CCDC 850236 ( $[\mathbf{1} \cdot \text{Fe} \cdot 2\text{MeCN} \cdot \text{H}_2\text{O}]^{2+} \cdot 2\text{ClO}_4^-$ ) contains the supplementary crystallographic data for this paper. These data can be obtained free of charge from The Cambridge Crystallographic Data Centre via [www.ccdc.cam.ac.uk/data\\_request/cif](http://www.ccdc.cam.ac.uk/data_request/cif).

## References

- 1 (a) J. P. K. Wong, A. A. Fahmi, G. W. Griffin and N. S. Bhacca, *Tetrahedron*, 1981, **37**, 3345; (b) E. Mai and C. Schneider, *Chem. Eur. J.*, 2007, **13**, 2729.
- 2 (a) C. Bolm, M. Ewald, M. Felder and G. Schlingloff, *Chem. Ber.*, 1992, **125**, 1169; (b) S. Ishikawa, T. Hamada, K. Manabe and S. Kobayashi, *Synthesis*, 2005, 2176.
- 3 W. C. Still, M. Kahn and A. Mitra, *J. Org. Chem.*, 1978, **43**, 2923.
- 4 M. W. Zettler, "Iron(II) Perchlorate", *e-EROS: Electronic Encyclopedia of Reagent for Organic Synthesis*, Wiley-VCH, 2001.
- 5 B. Gao, Y. Wen, Z. Yang, X. Huang, X. Liu and X. Feng, *Adv. Synth. Catal.*, 2008, **350**, 385.
- 6 R. I. Kureshy, S. Singh, N.-u. H. Khan, S. H. R. Abdi, E. Suresh and R. V. Jasra, *Eur. J. Org. Chem.*, 2006, 1303.
- 7 S. Azoulay, K. Manabe and S. Kobayashi, *Org. Lett.*, 2005, **7**, 4593.
- 8 E. Mai and C. Schneider, *Chem. Eur. J.*, 2007, **13**, 2729.



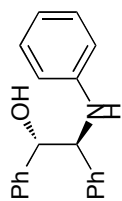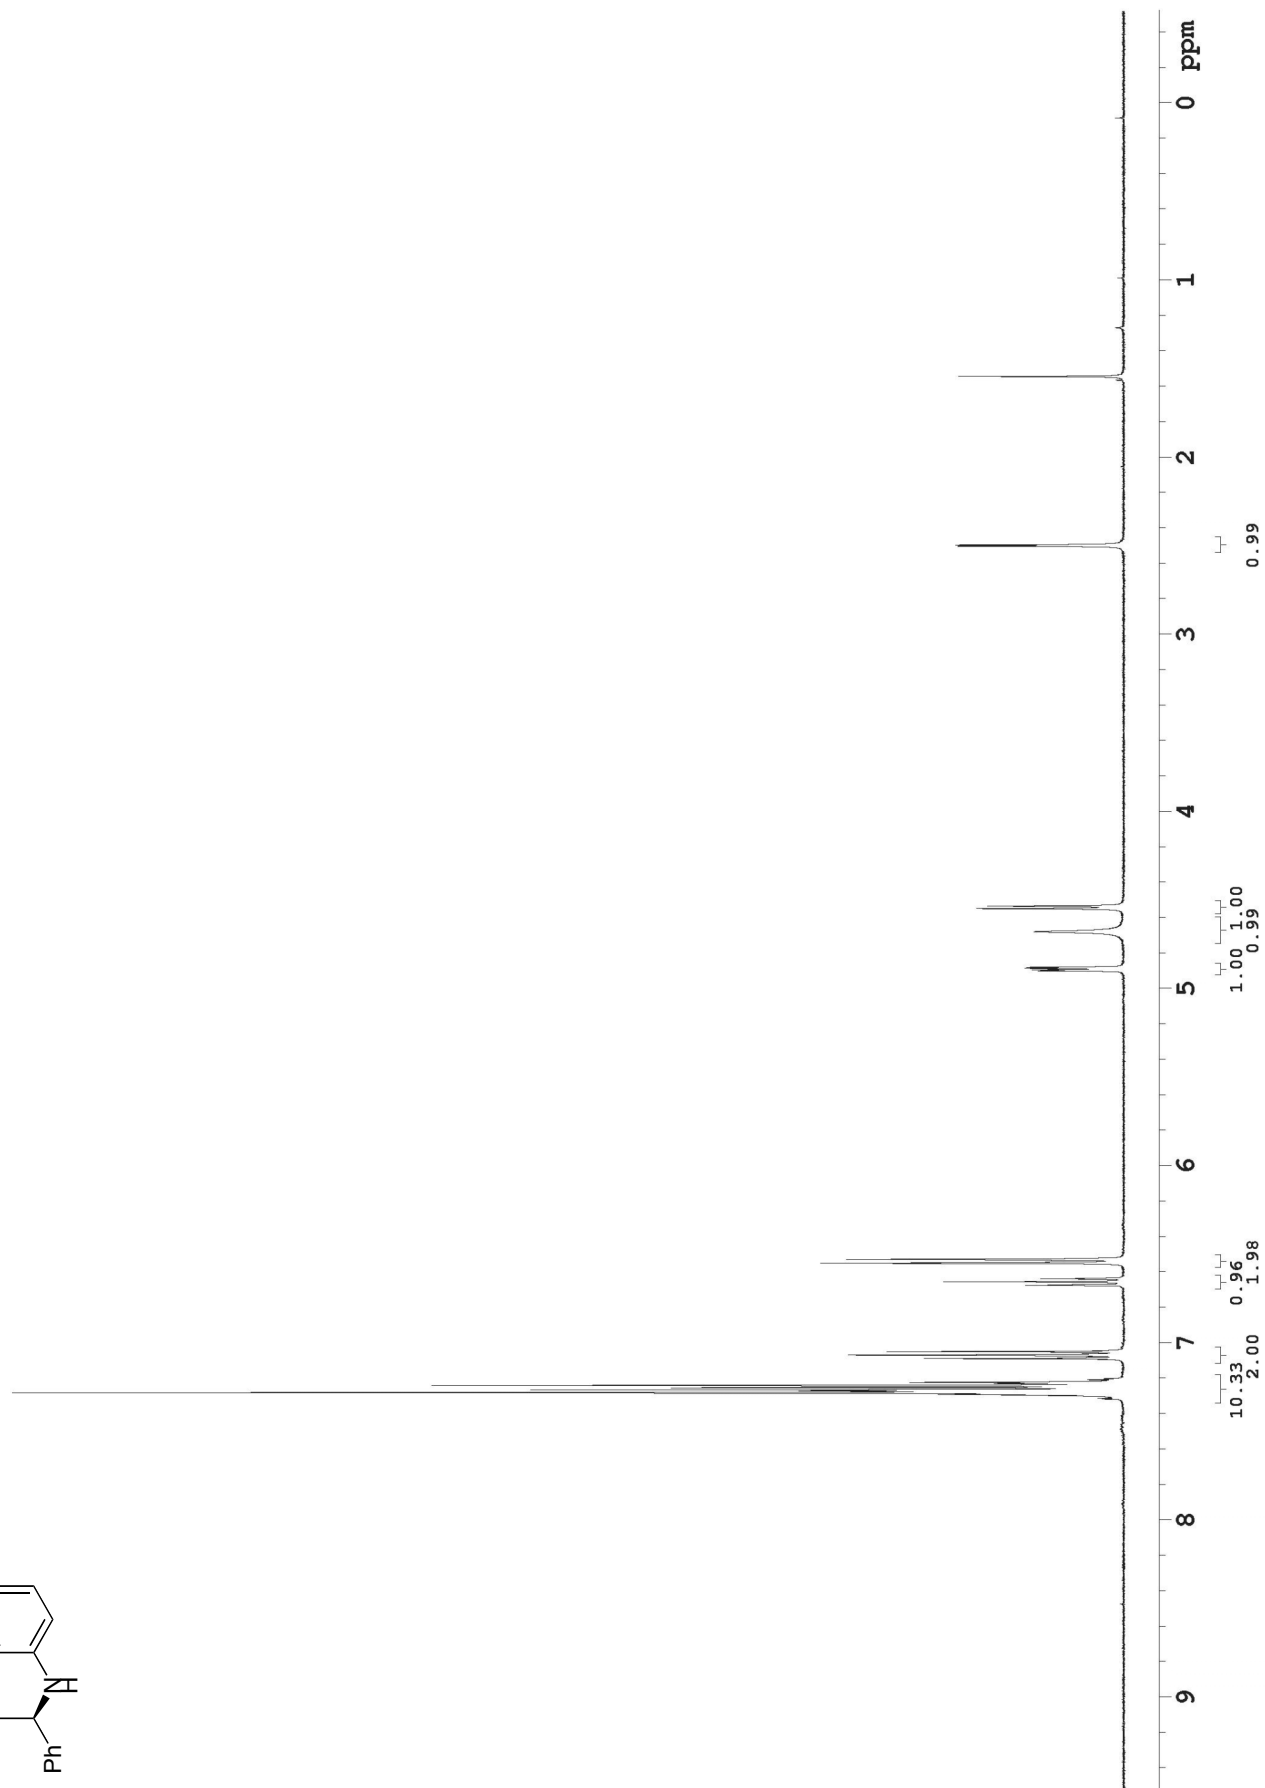

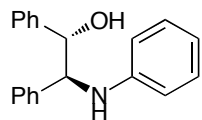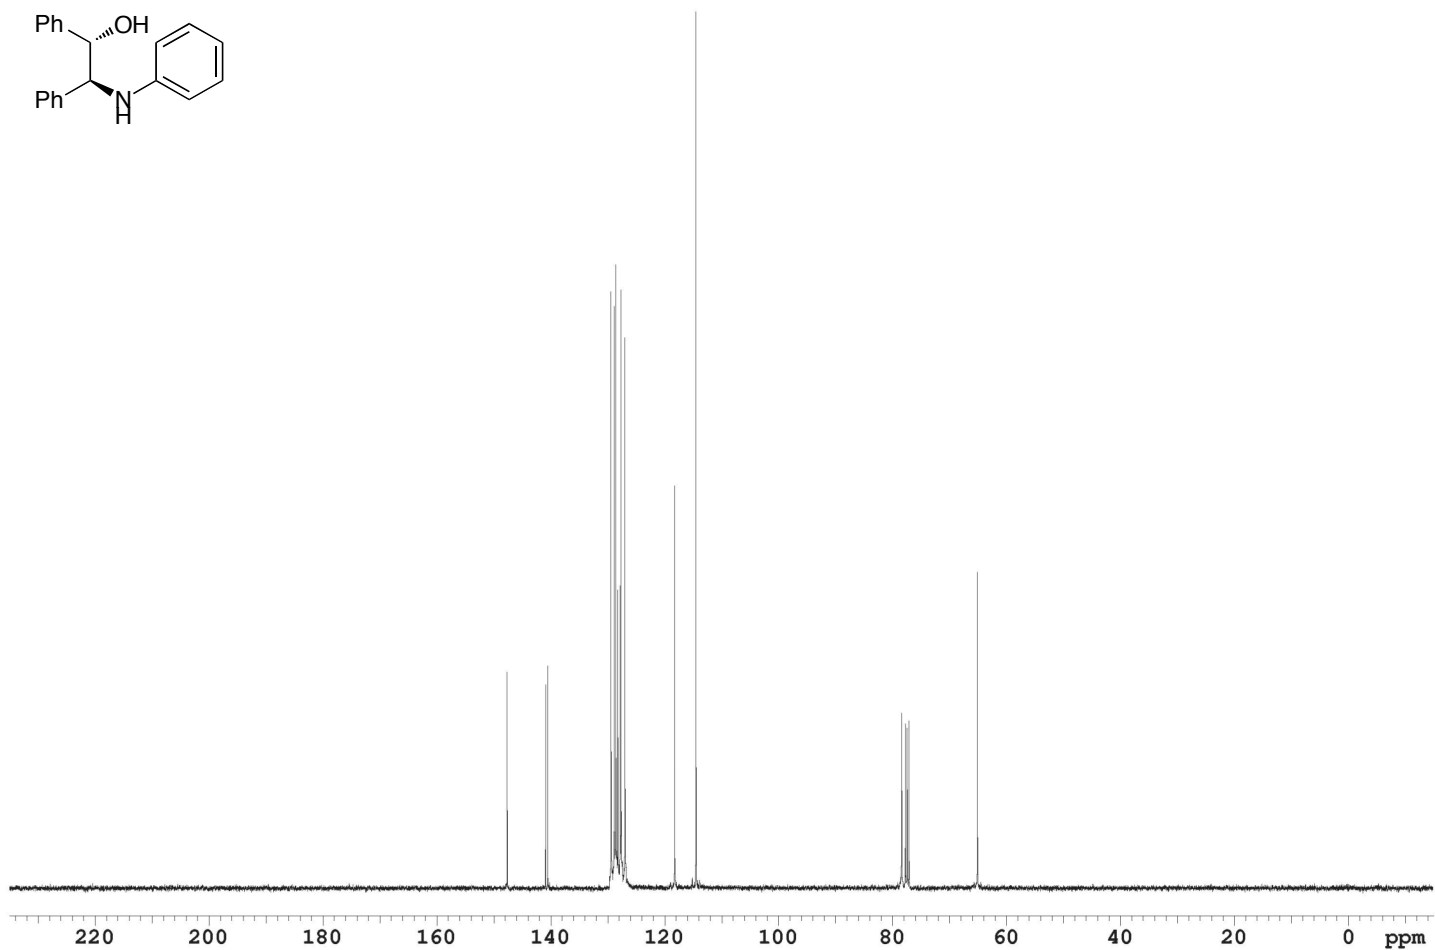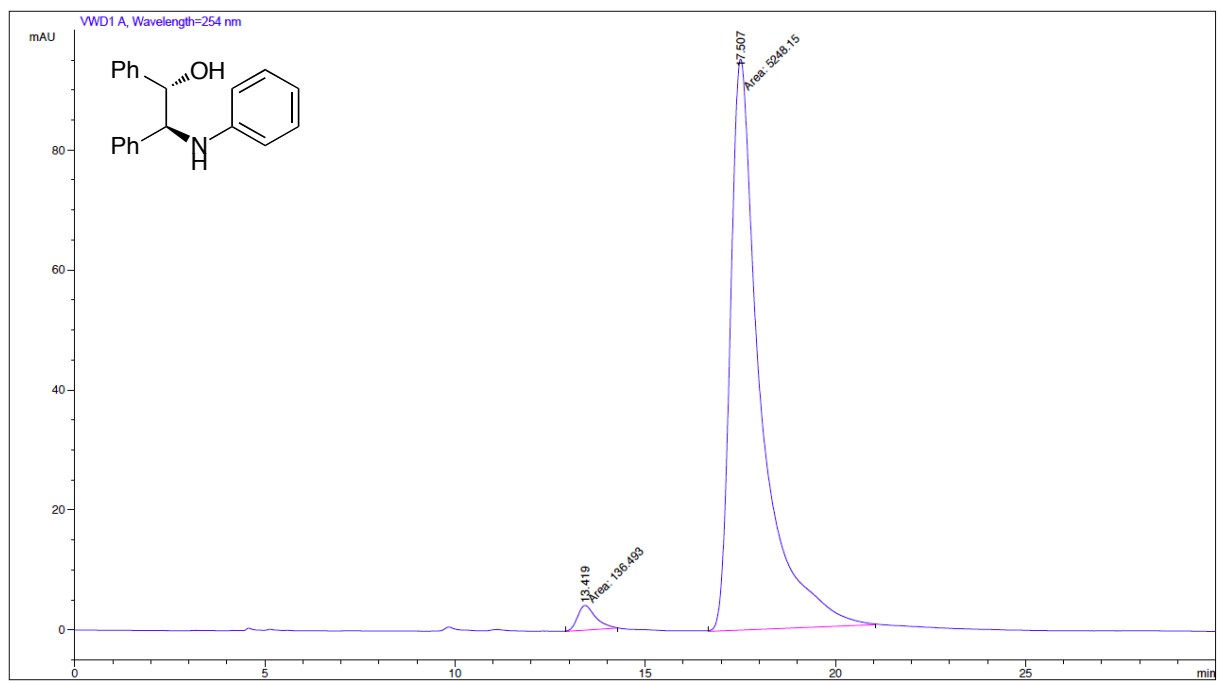

Signal 1: VWD1 A, Wavelength=254 nm

| Peak # | RetTime [min] | Type | Width [min] | Area mAU*s | Height [mAU] | Area %  |
|--------|---------------|------|-------------|------------|--------------|---------|
| 1      | 13.419        | MM   | 0.5525      | 136.49316  | 4.11758      | 2.5349  |
| 2      | 17.507        | MM   | 0.9188      | 5248.14648 | 95.19704     | 97.4651 |

Totals : 5384.63965 99.31461

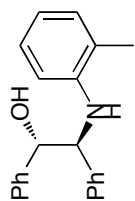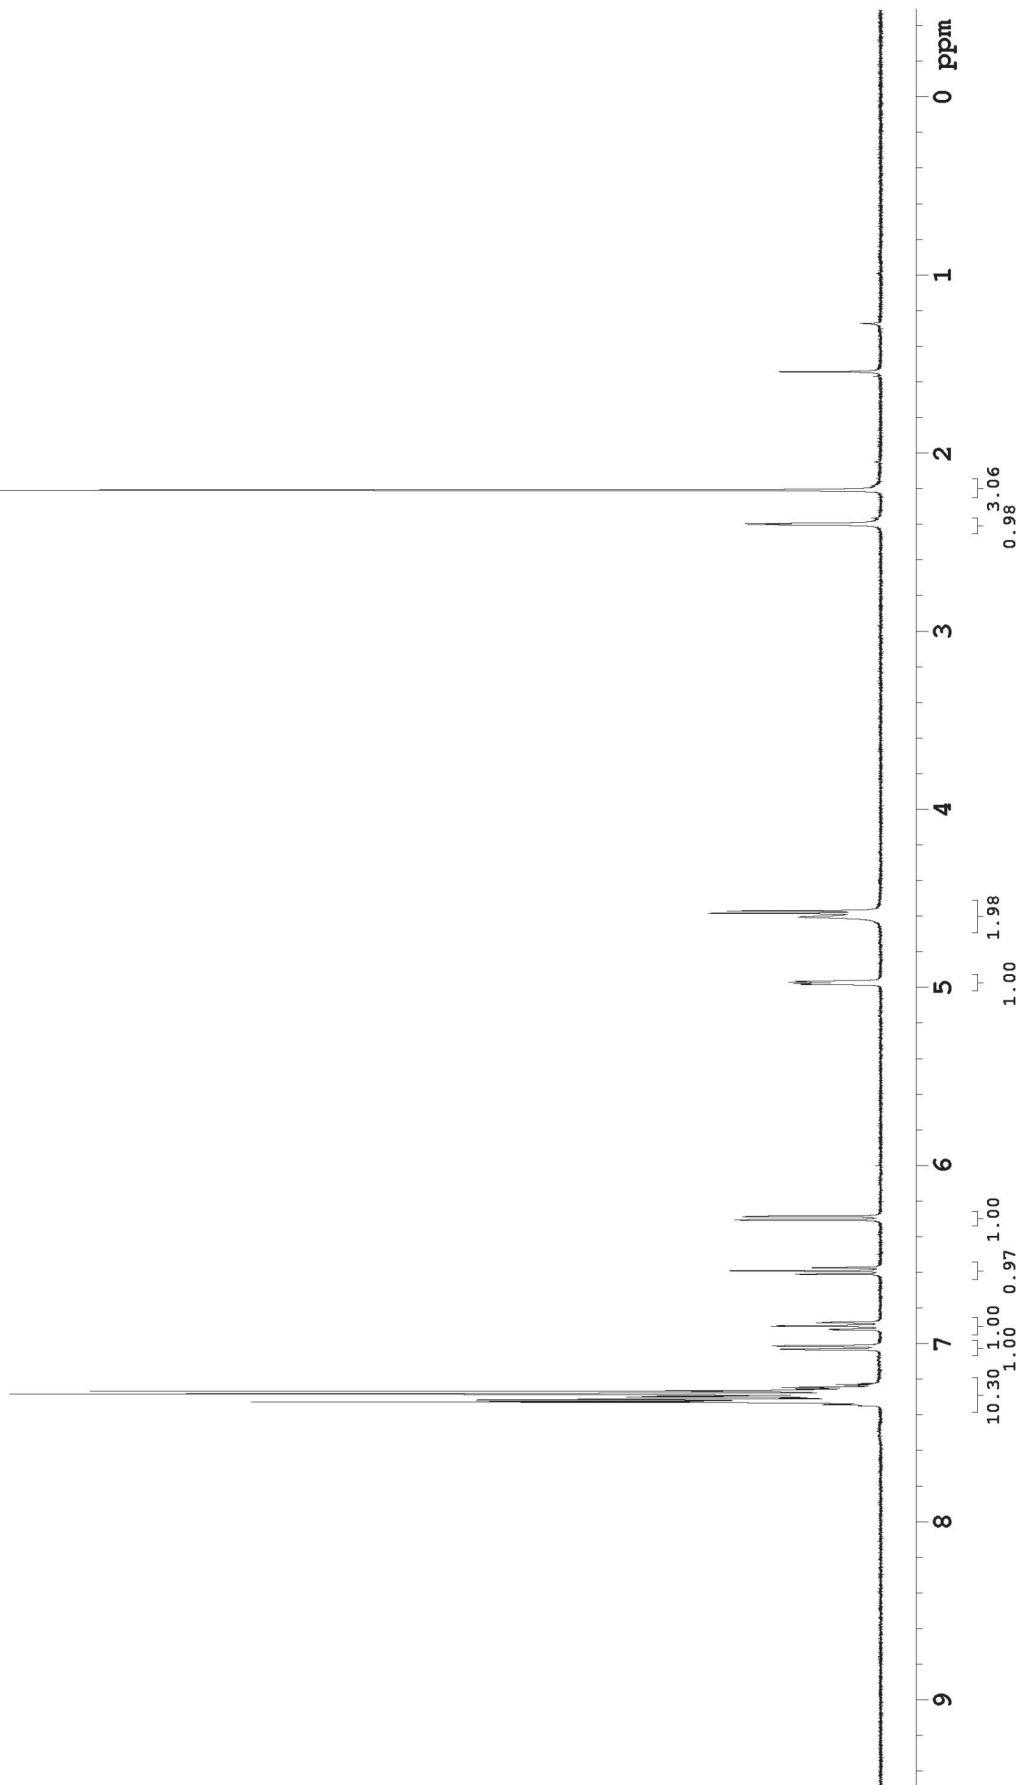

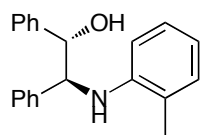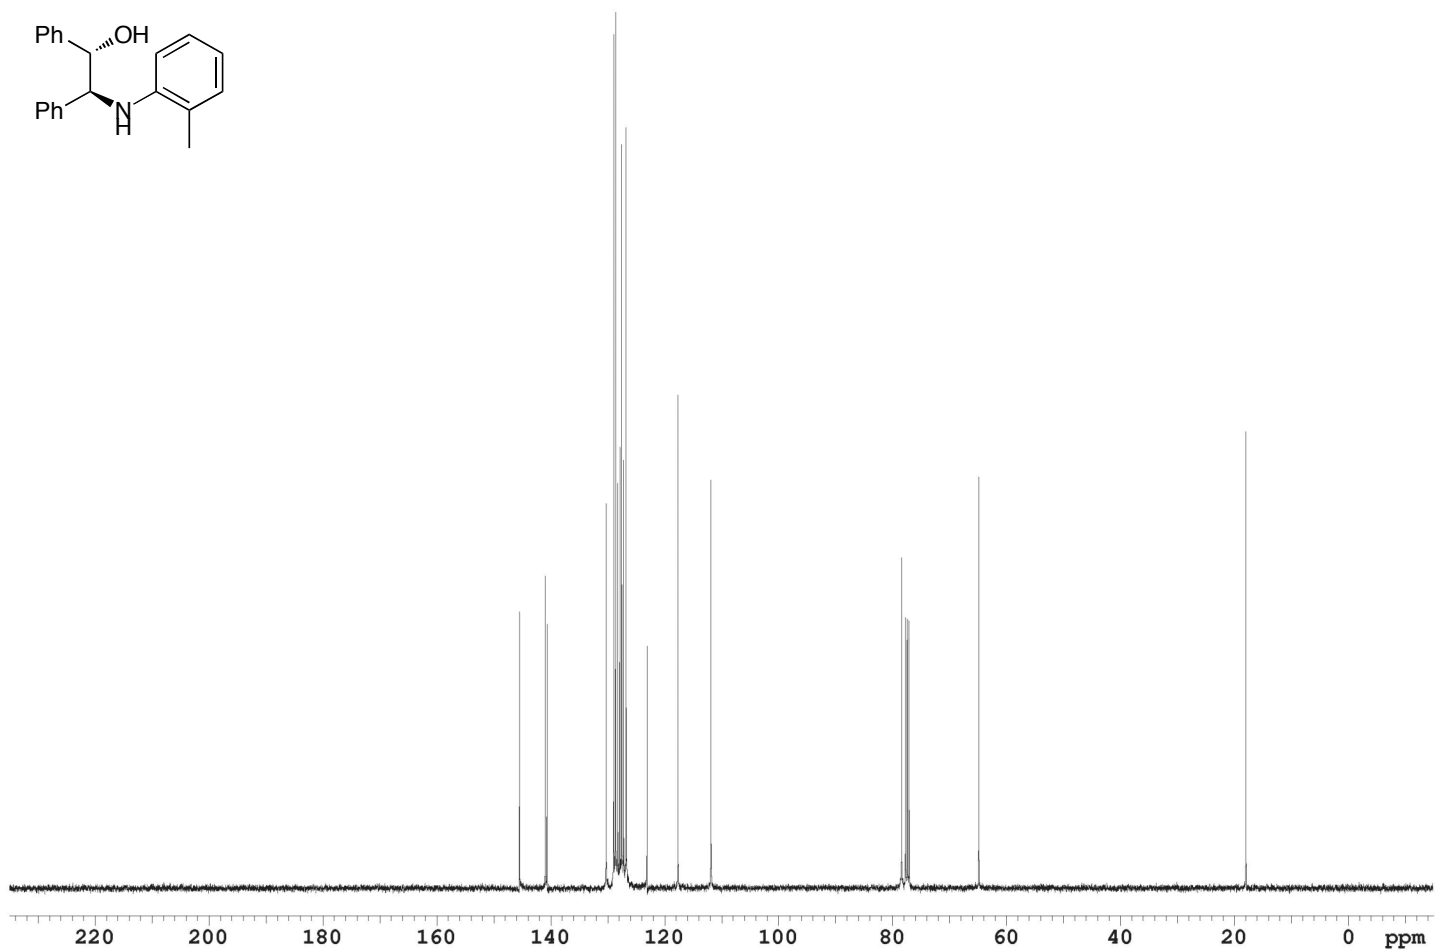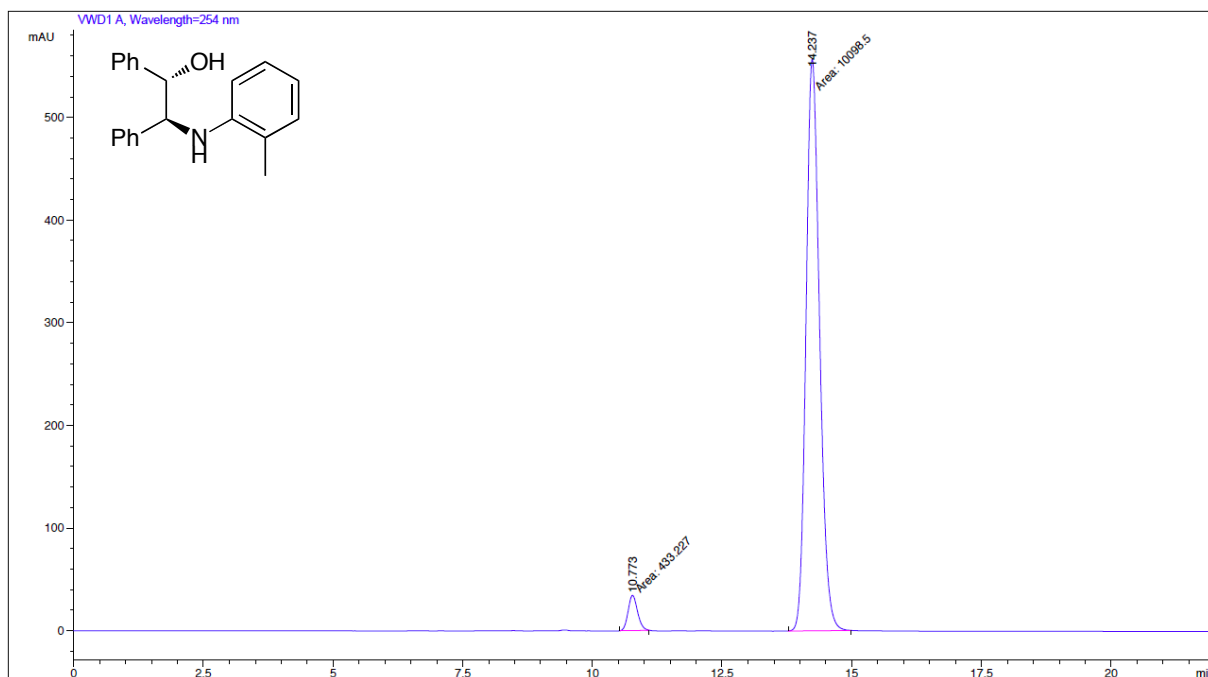

Signal 1: WVD1 A, Wavelength=254 nm

| Peak # | RetTime [min] | Type | Width [min] | Area mAU  | Area *s   | Height [mAU] | Area % |
|--------|---------------|------|-------------|-----------|-----------|--------------|--------|
| 1      | 10.773        | MM   | 0.2103      | 433.22702 | 34.32811  | 4.1135       |        |
| 2      | 14.237        | MM   | 0.3021      | 1.00985e4 | 557.10486 | 95.8865      |        |

Totals : 1.05317e4 591.43296

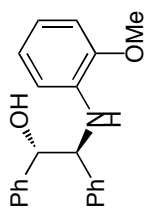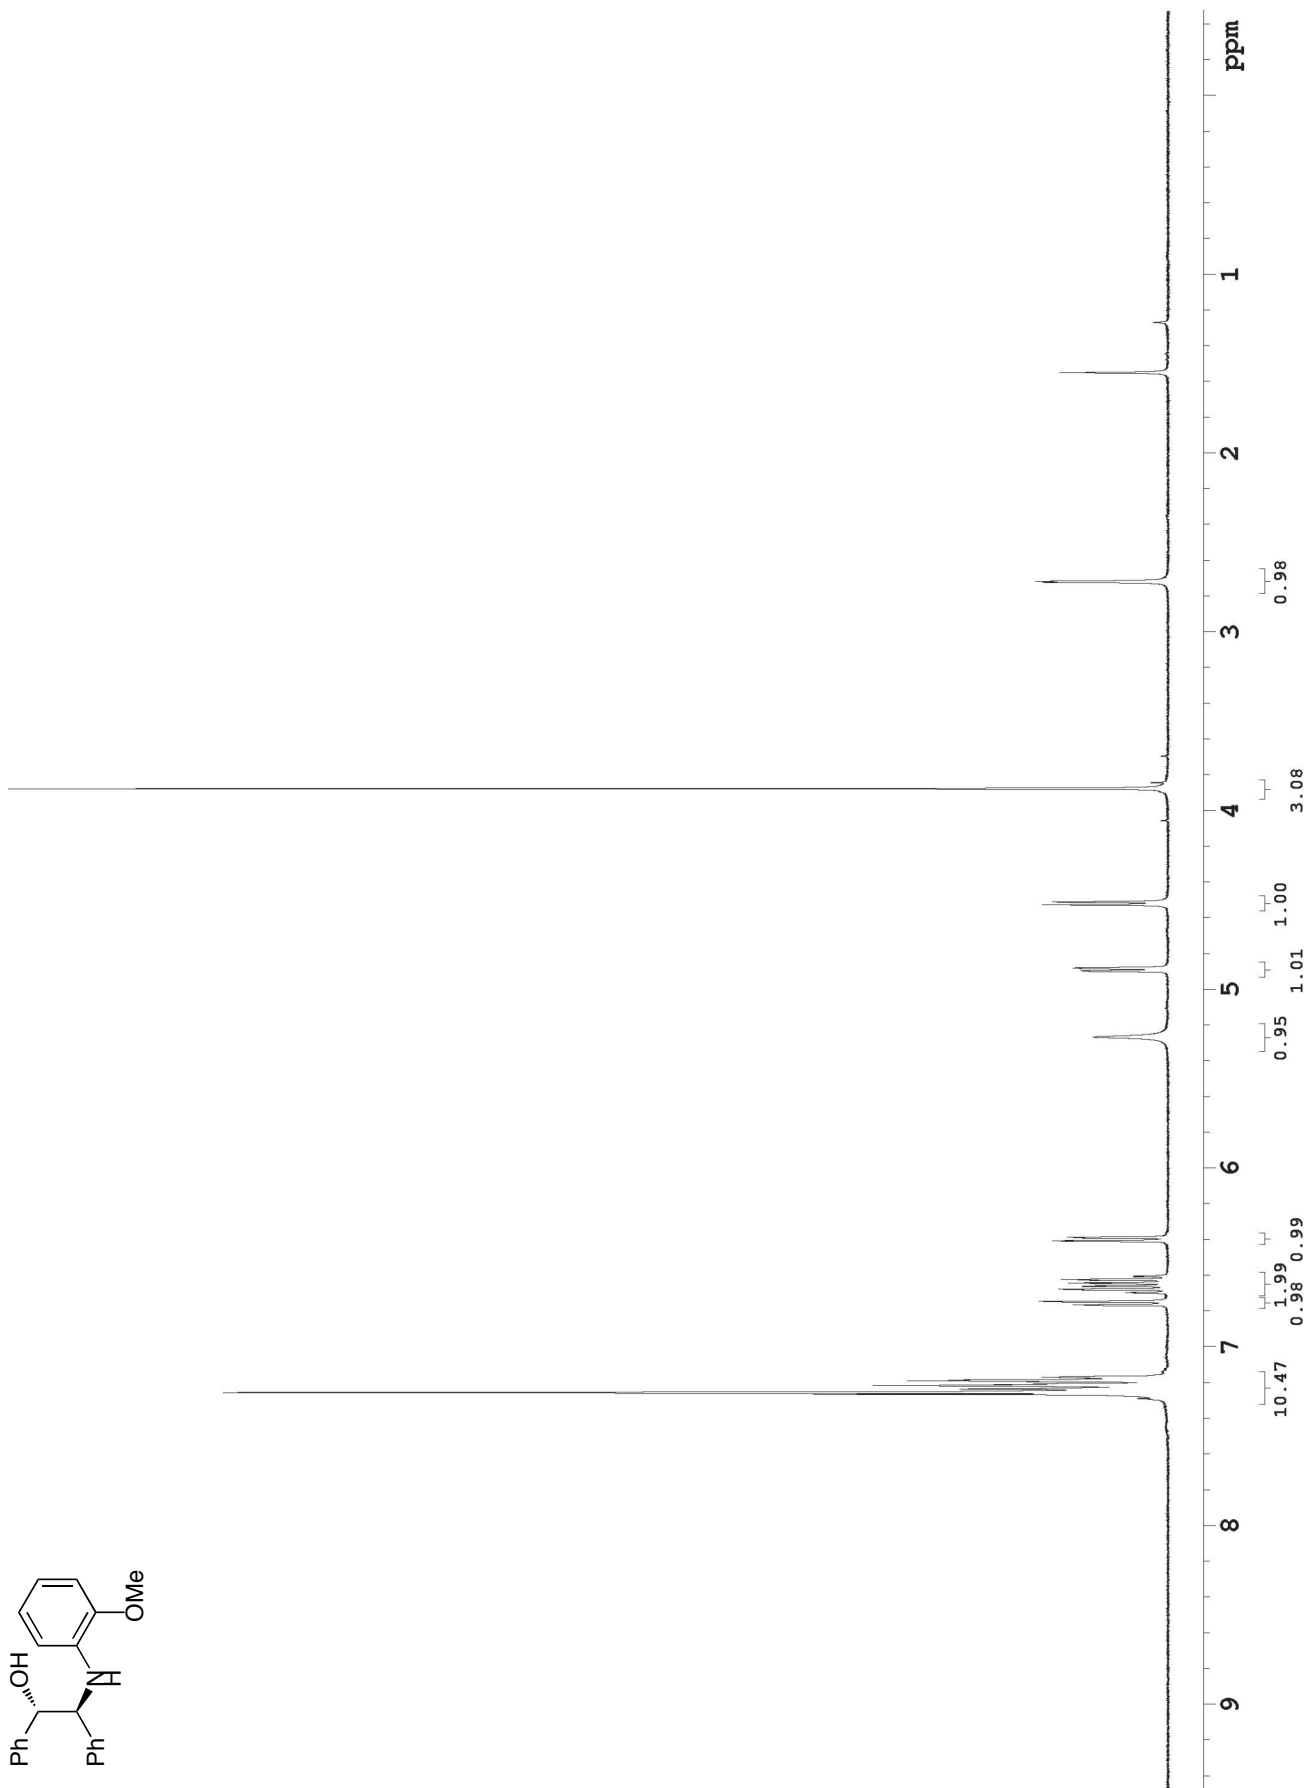

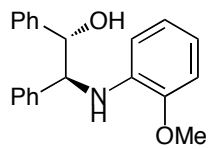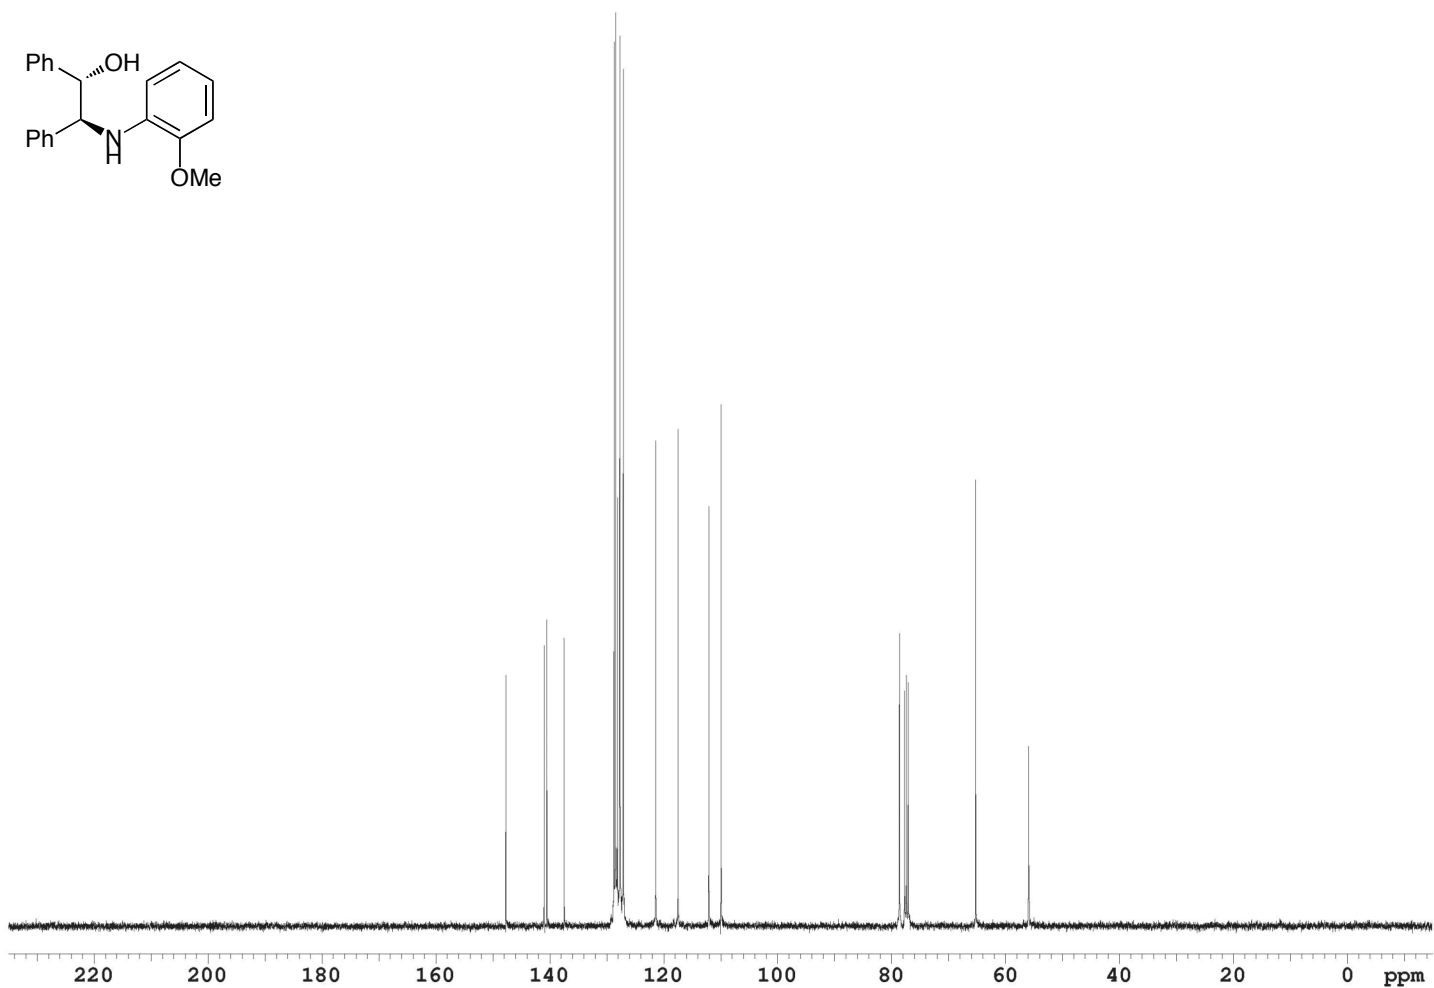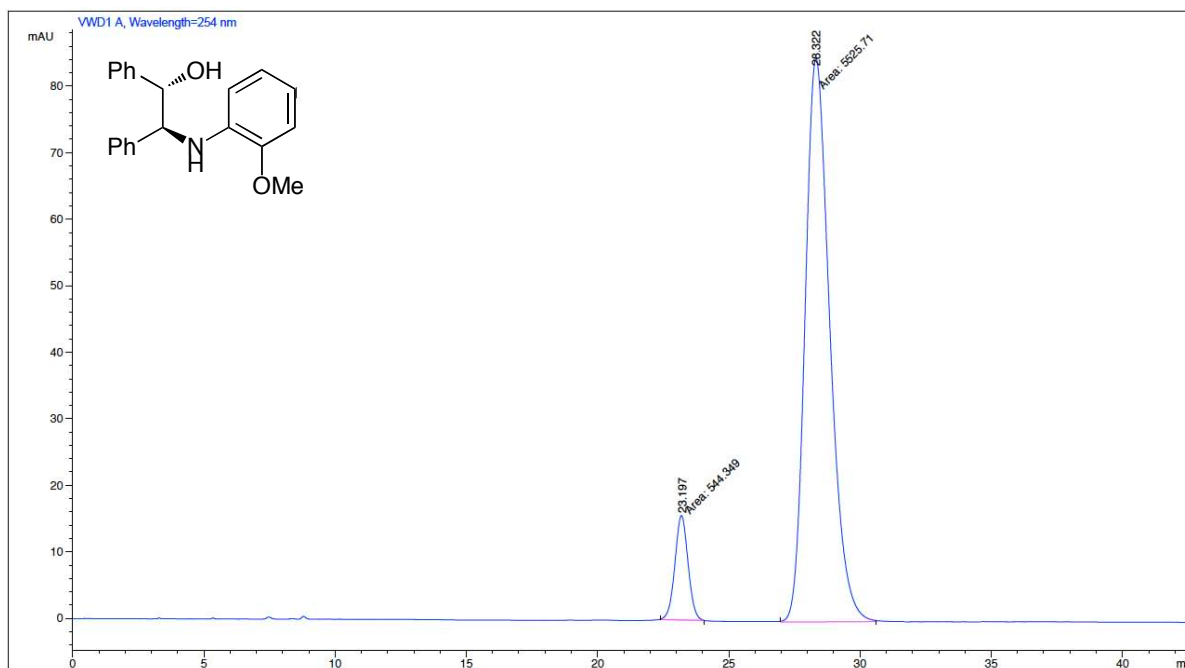

Signal 1: VWD1 A, Wavelength=254 nm

| Peak # | RetTime [min] | Type | Width [min] | Area mAU * s | Height [mAU] | Area %  |
|--------|---------------|------|-------------|--------------|--------------|---------|
| 1      | 23.197        | MM   | 0.5766      | 544.34882    | 15.73445     | 8.9678  |
| 2      | 28.322        | MM   | 1.0872      | 5525.70801   | 84.70680     | 91.0322 |

Totals : 6070.05682 100.44125

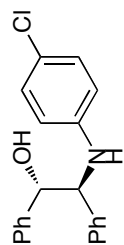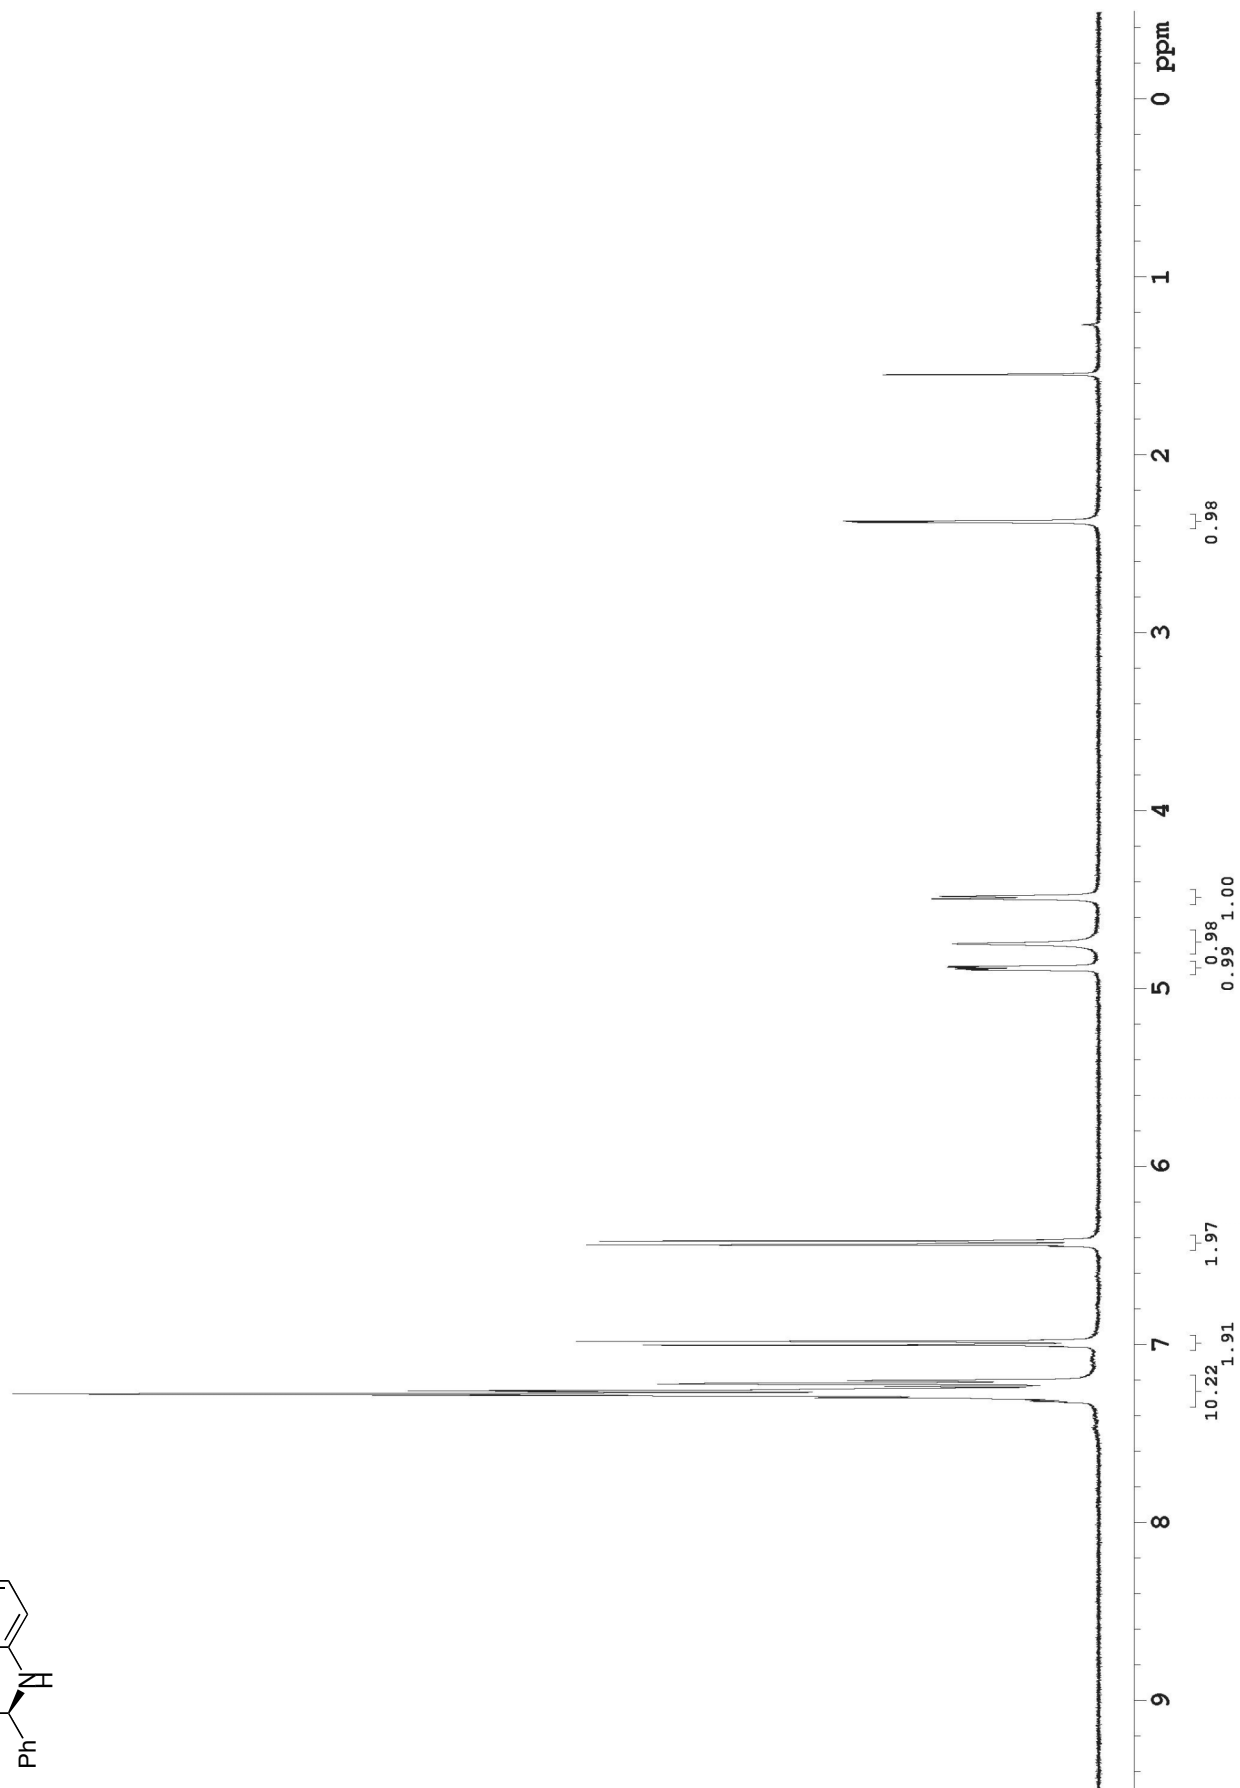



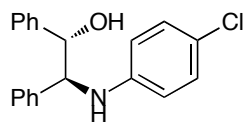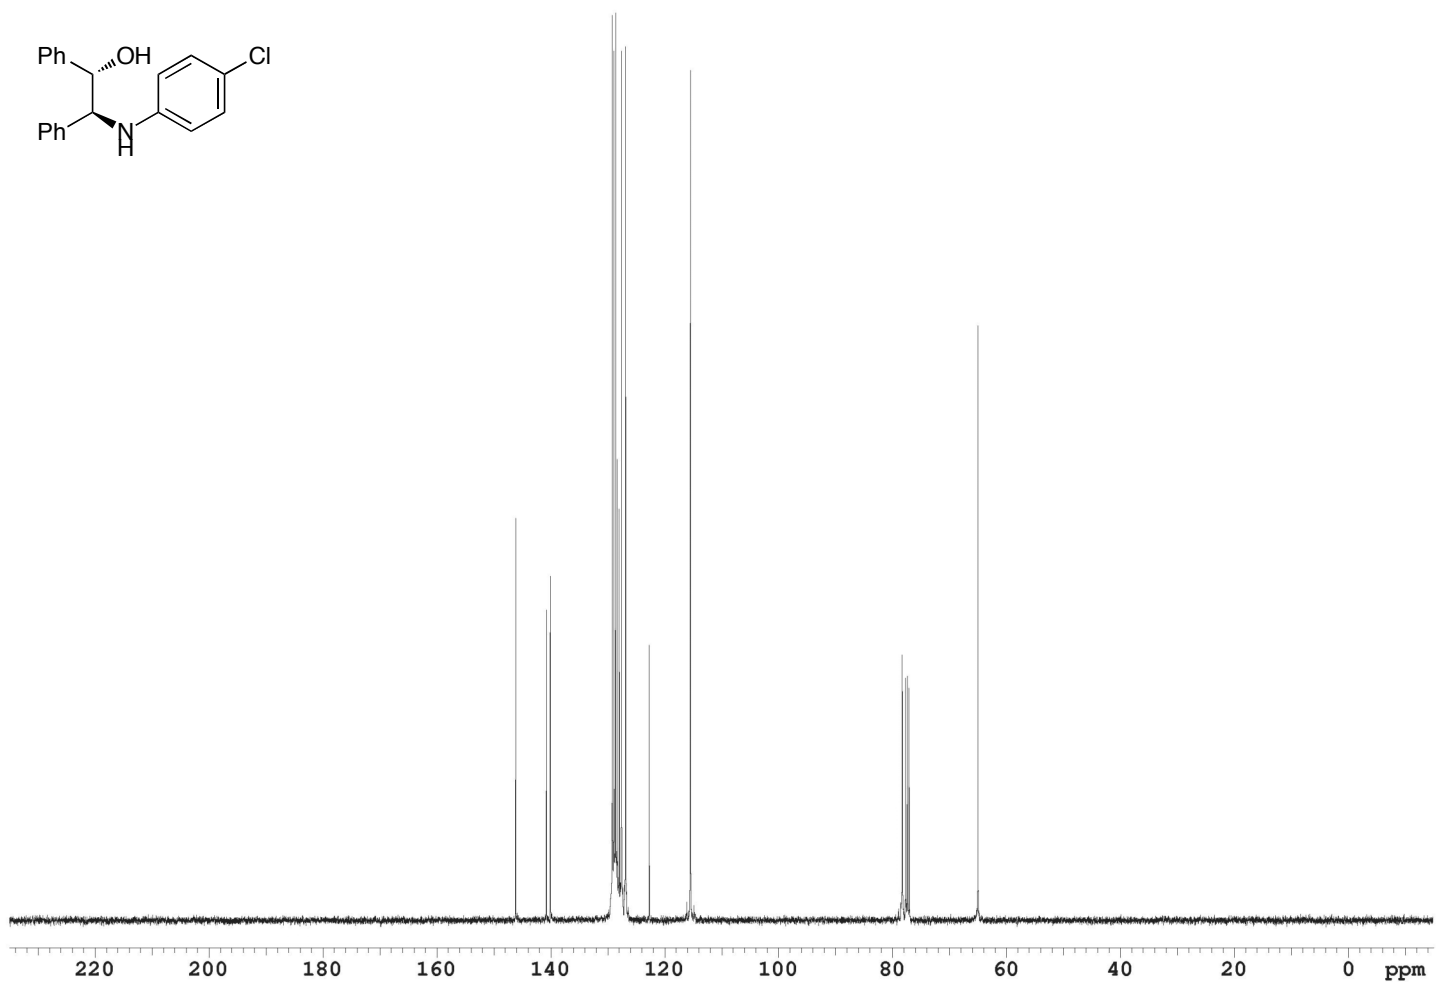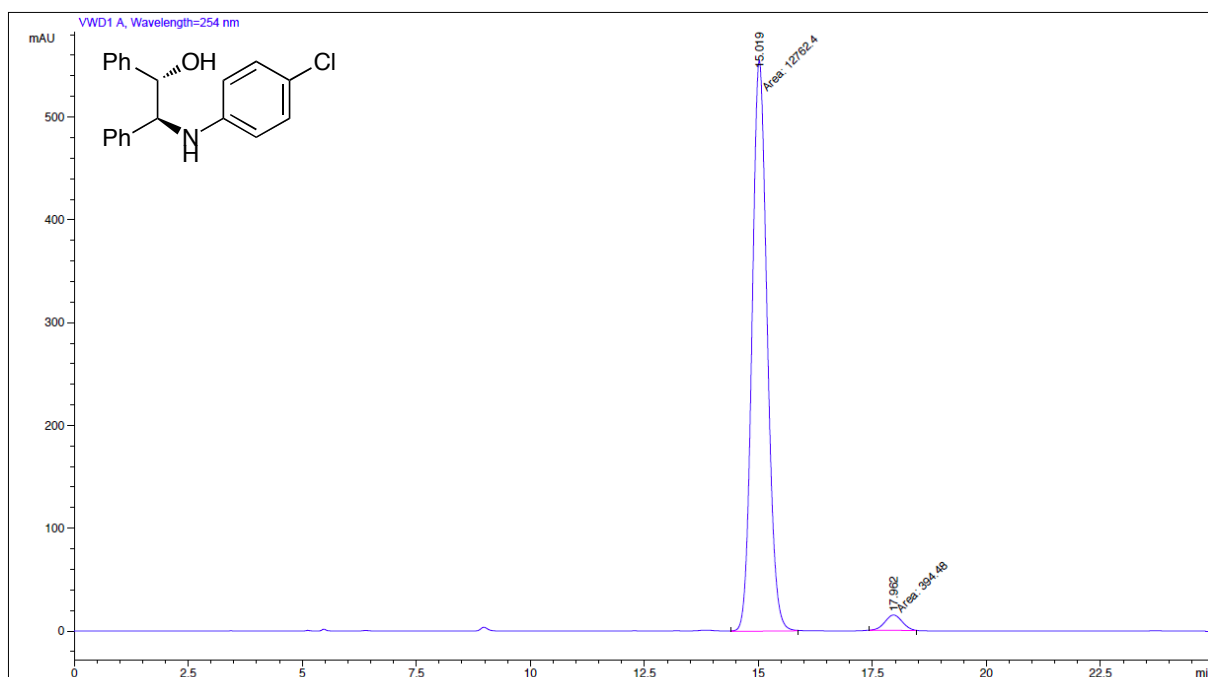

Signal 1: VWD1 A, Wavelength=254 nm

| Peak # | RetTime [min] | Type | Width [min] | Area mAU*s | Height [mAU] | Area %  |
|--------|---------------|------|-------------|------------|--------------|---------|
| 1      | 15.019        | MM   | 0.3832      | 1.27624e4  | 555.10309    | 97.0017 |
| 2      | 17.962        | MM   | 0.4403      | 394.48026  | 14.93109     | 2.9983  |

Totals : 1.31569e4 570.03418

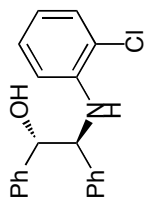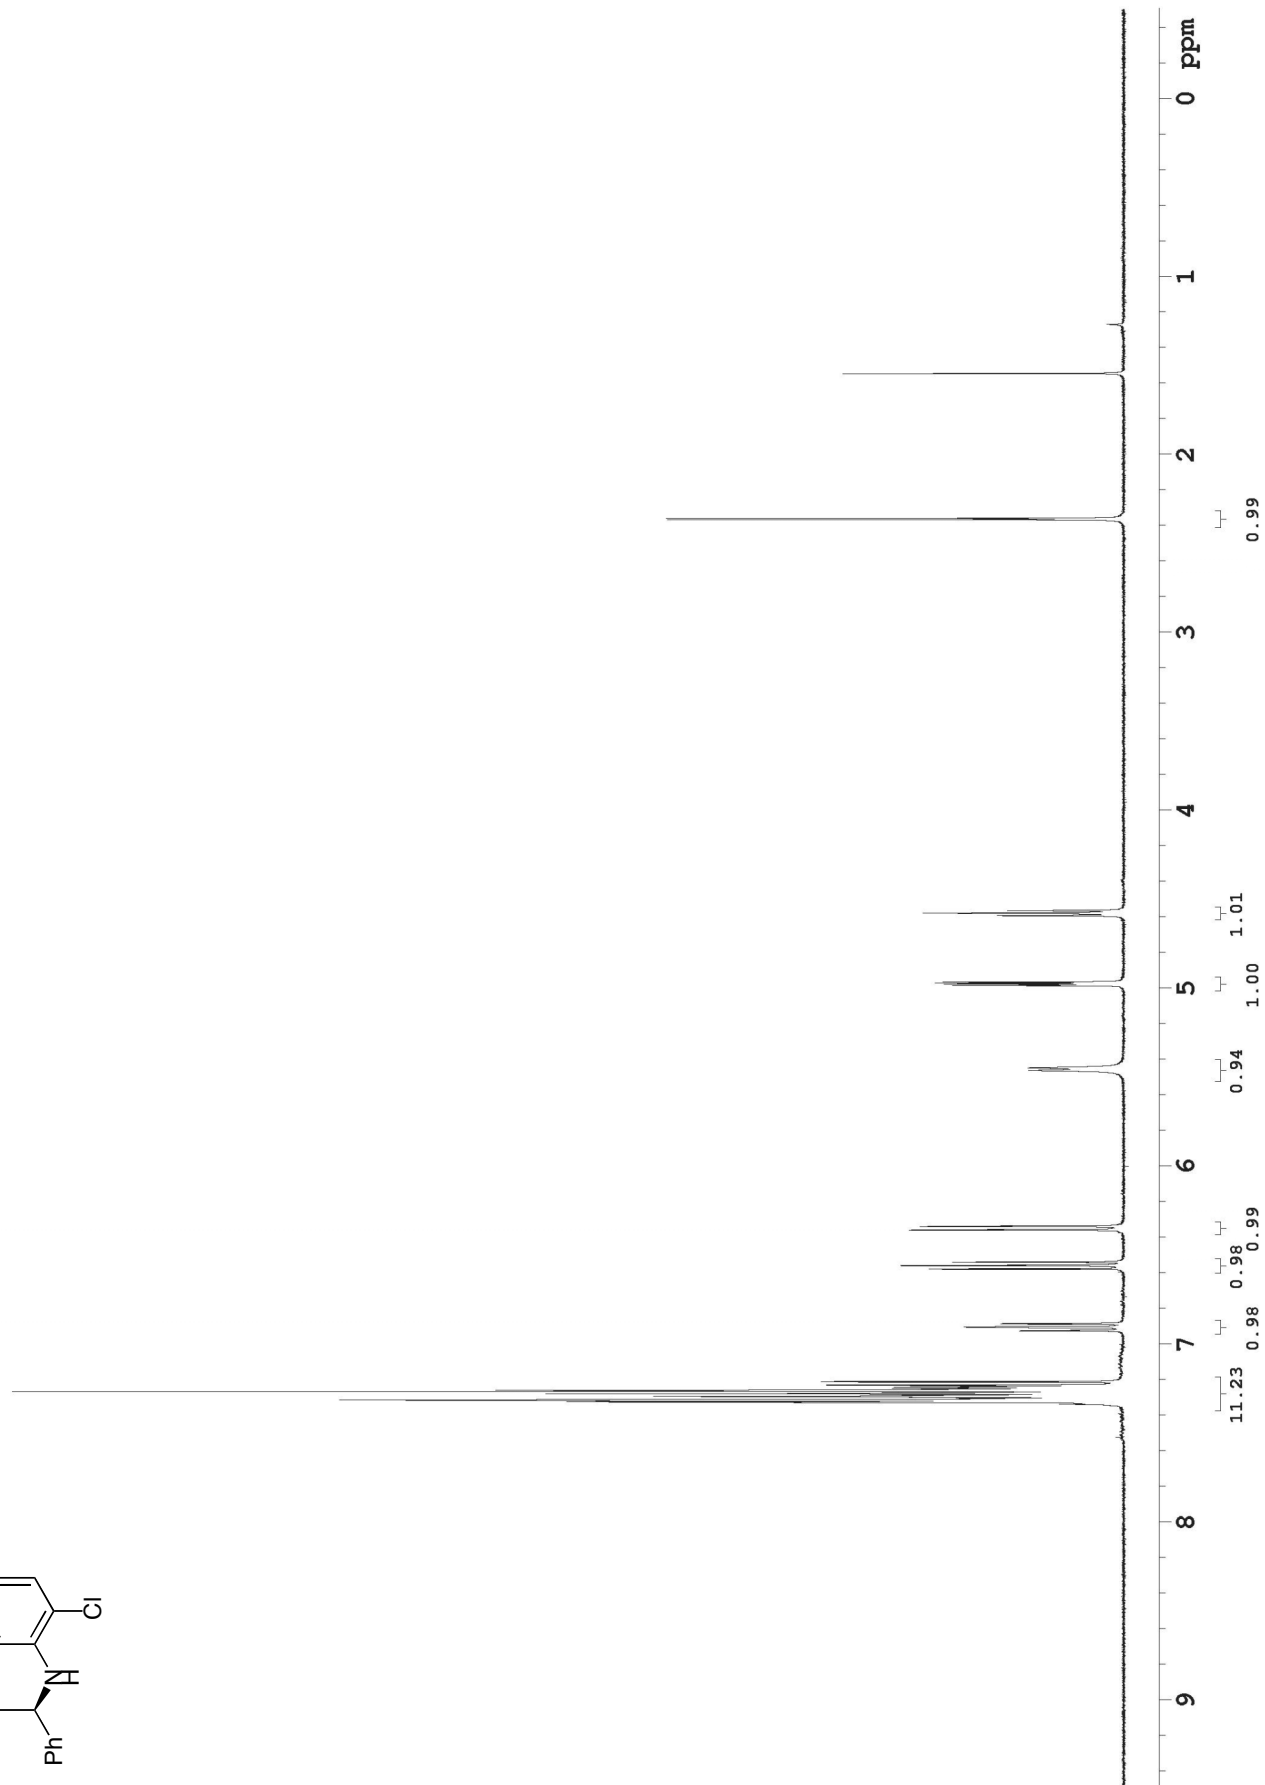

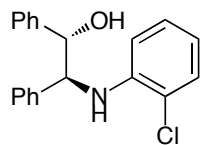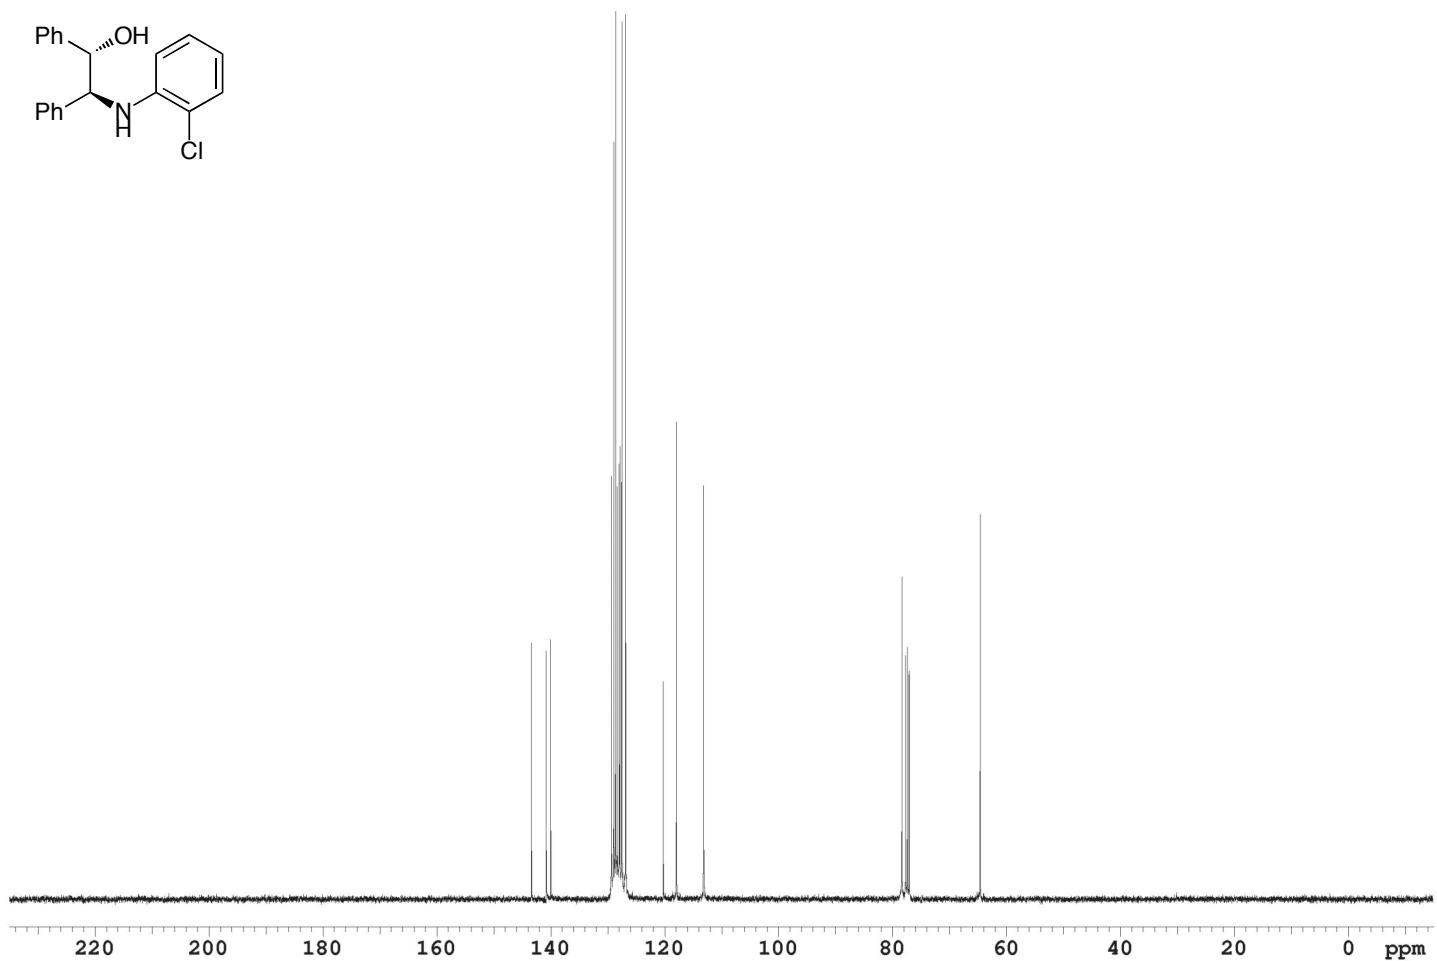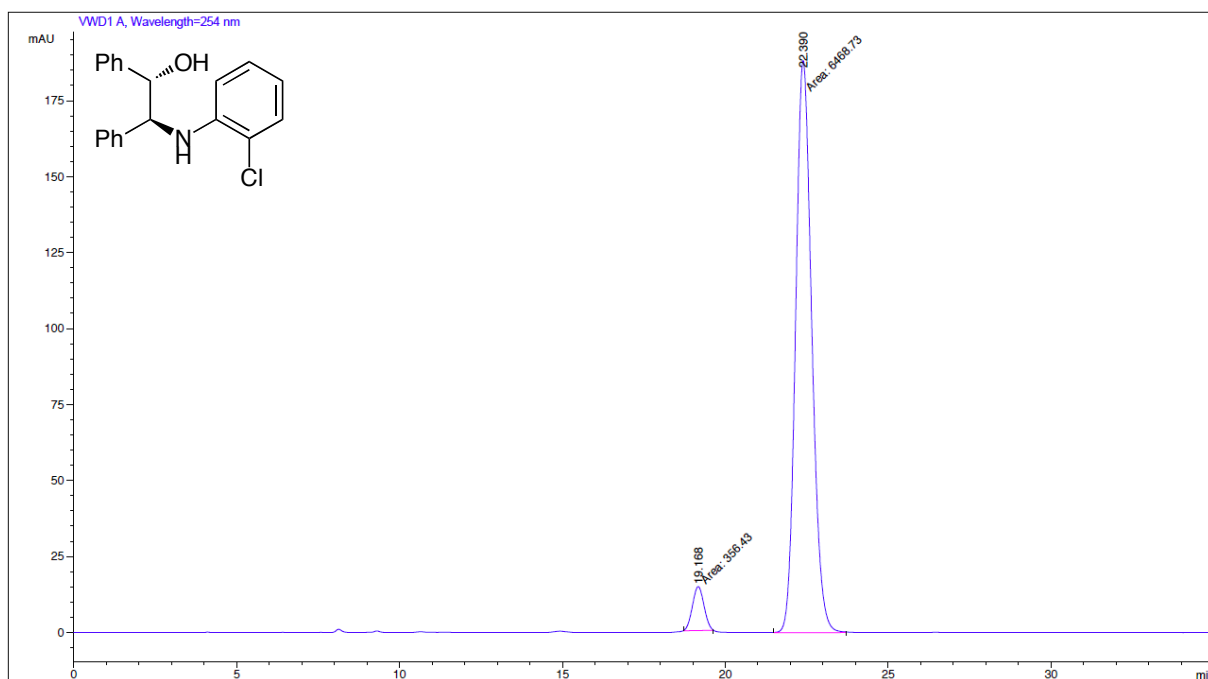

Signal 1: WVD1 A, Wavelength=254 nm

| Peak # | RetTime [min] | Type | Width [min] | Area mAU   | Area *s   | Height [mAU] | Area % |
|--------|---------------|------|-------------|------------|-----------|--------------|--------|
| 1      | 19.168        | MM   | 0.4107      | 356.43011  | 14.46590  | 5.2223       |        |
| 2      | 22.390        | MM   | 0.5726      | 6468.73291 | 188.28630 | 94.7777      |        |

Totals : 6825.16302 202.75220

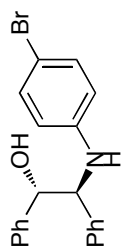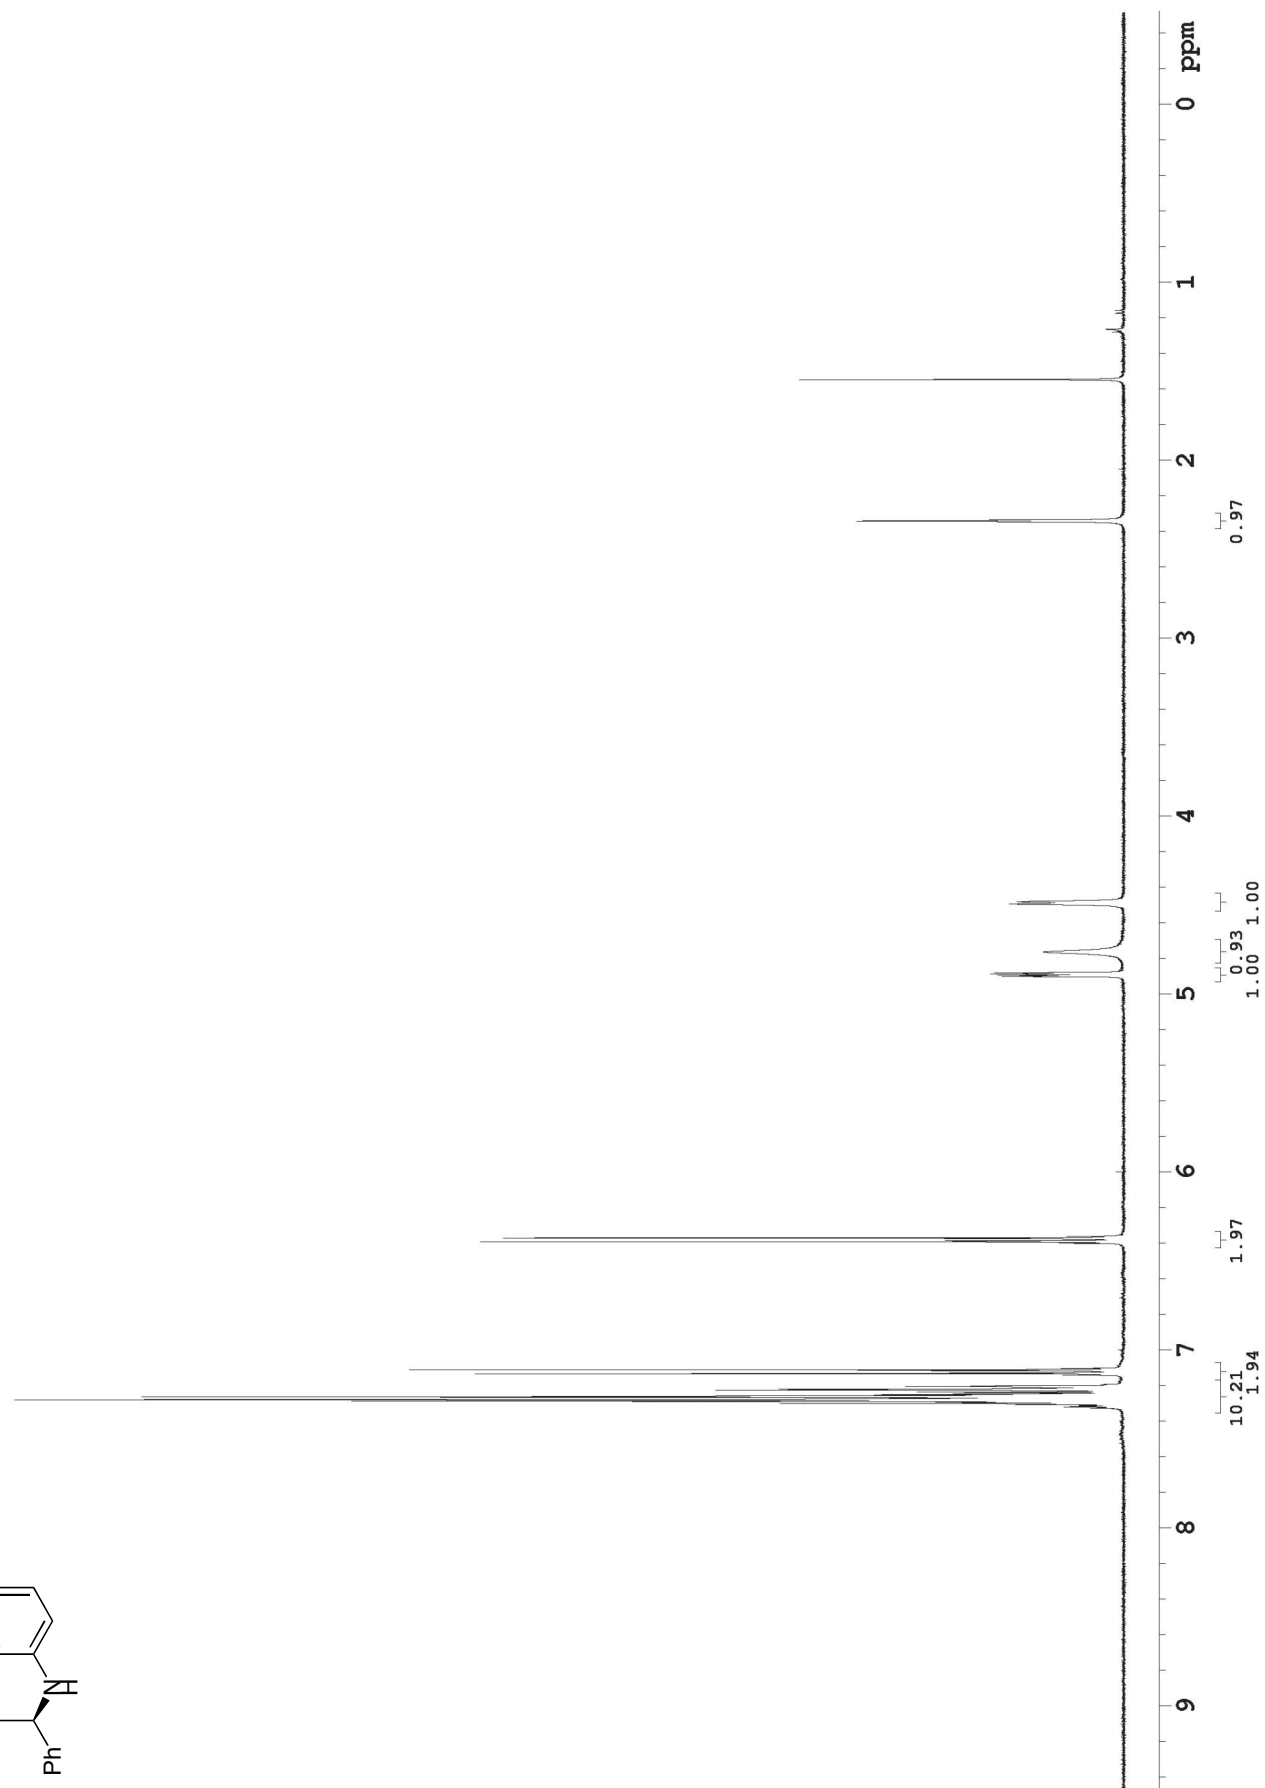

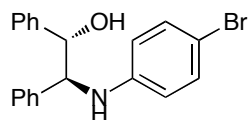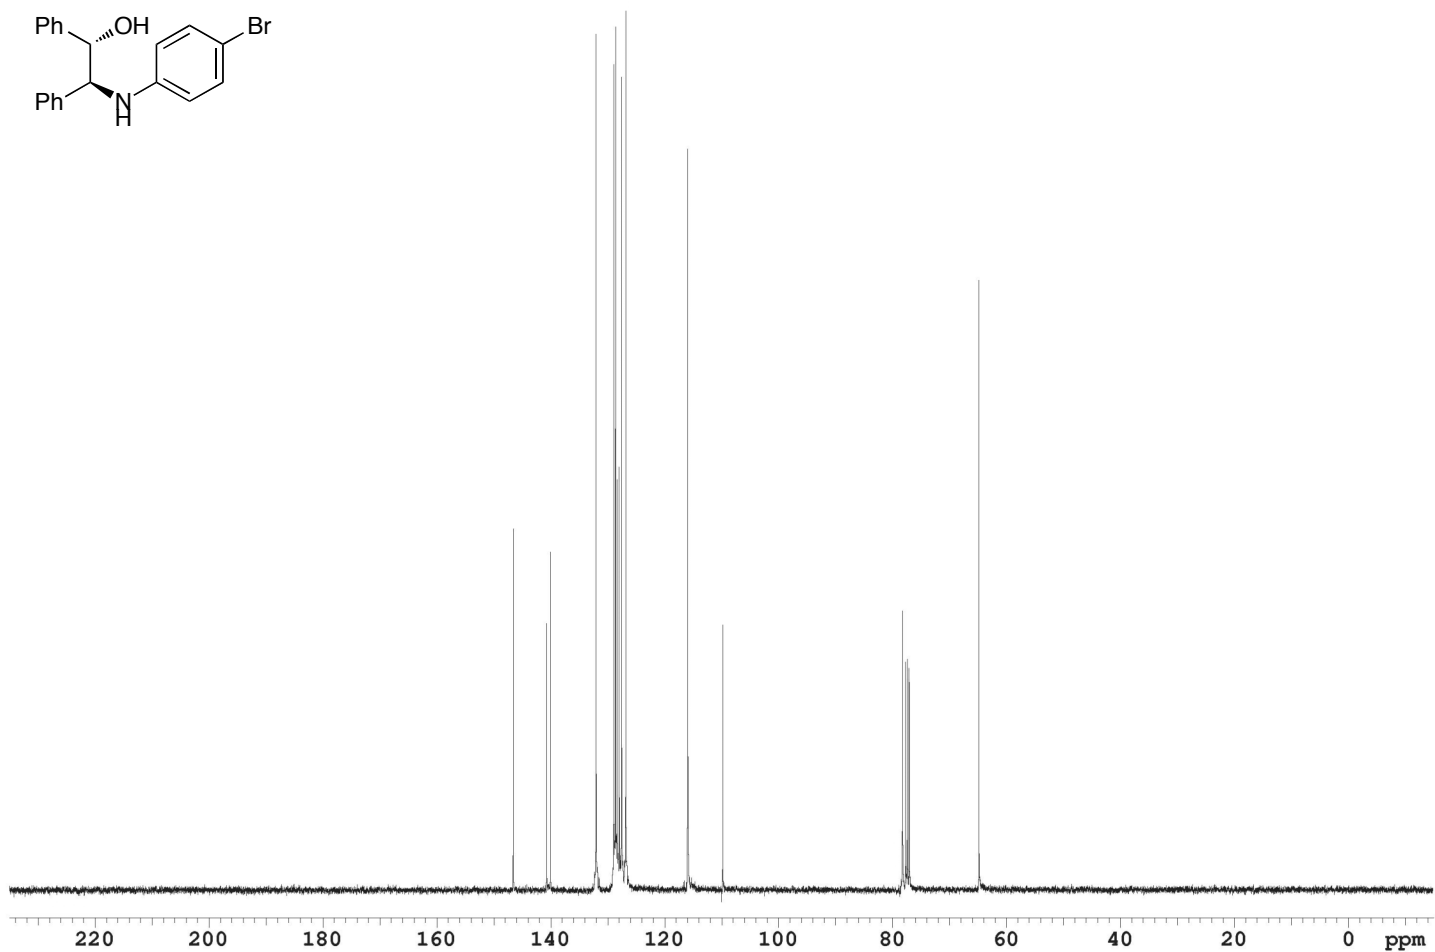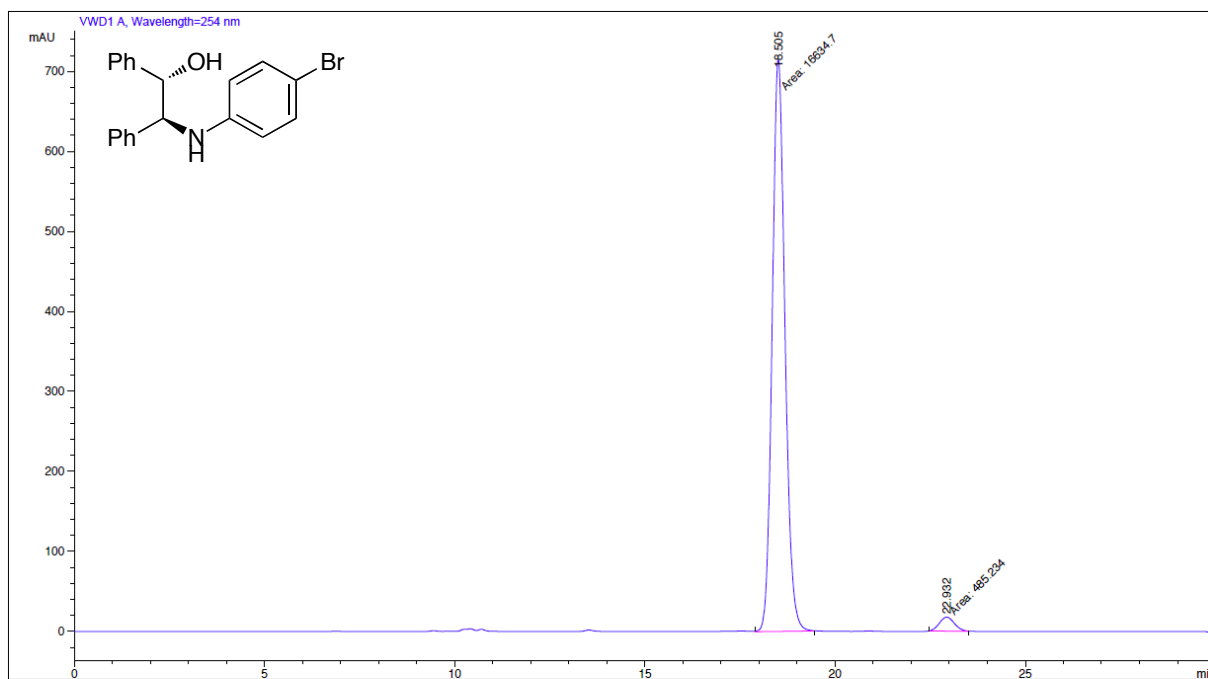

Signal 1: VWD1 A, Wavelength=254 nm

| Peak # | RetTime [min] | Type | Width [min] | Area mAU*s | Height [mAU] | Area %  |
|--------|---------------|------|-------------|------------|--------------|---------|
| 1      | 18.505        | MM   | 0.3878      | 1.66347e4  | 714.83319    | 97.1657 |
| 2      | 22.932        | MM   | 0.4621      | 485.23422  | 17.50172     | 2.8343  |

Totals : 1.71200e4 732.33491



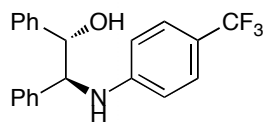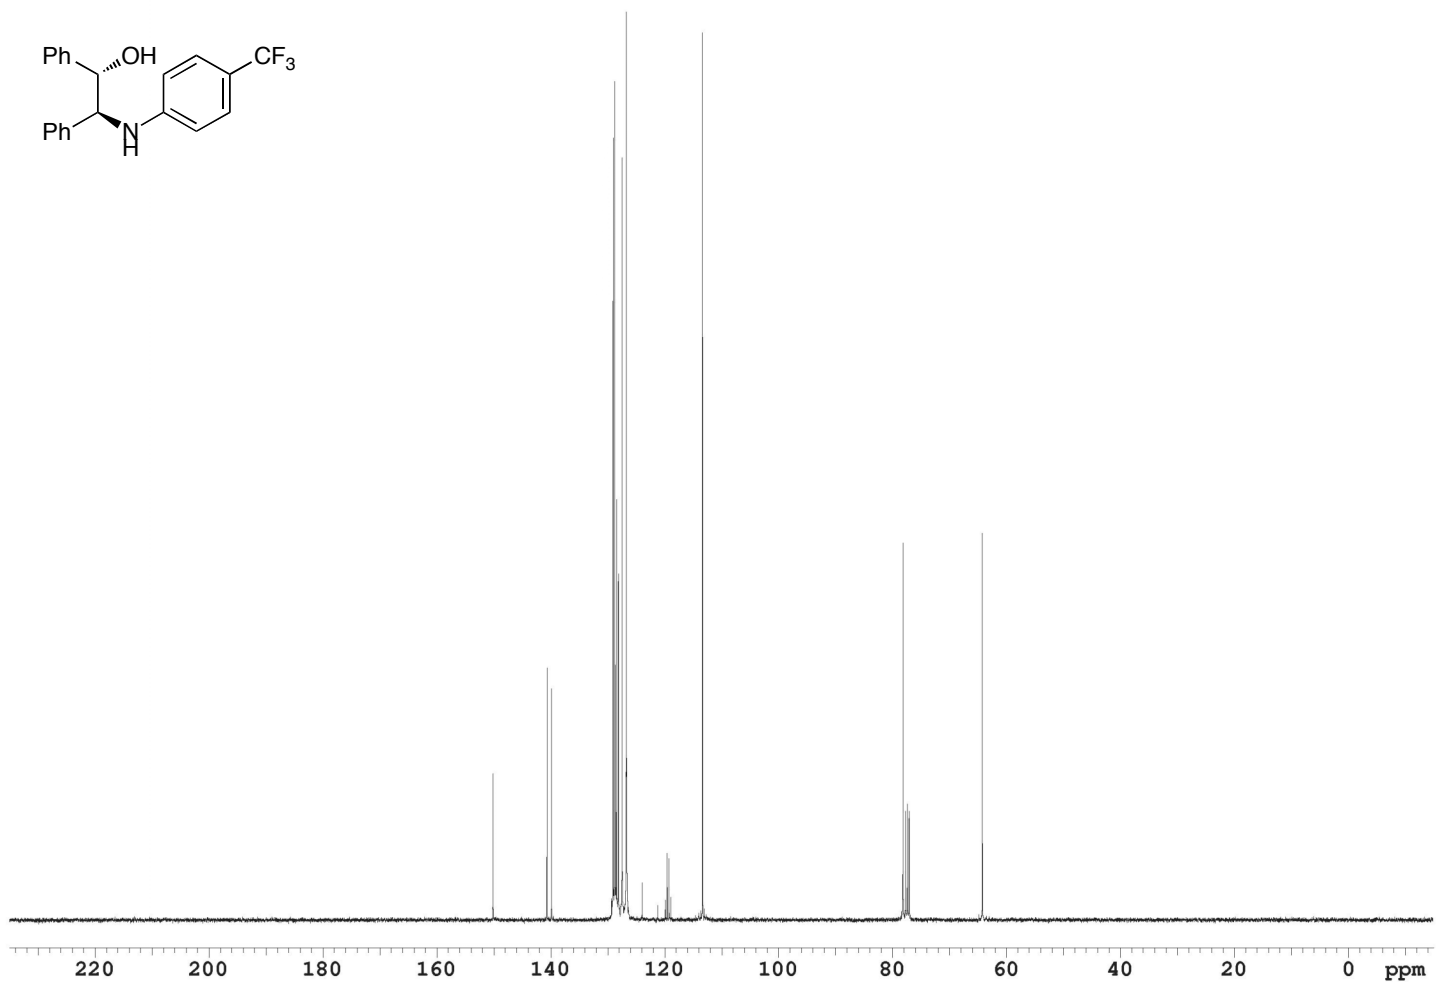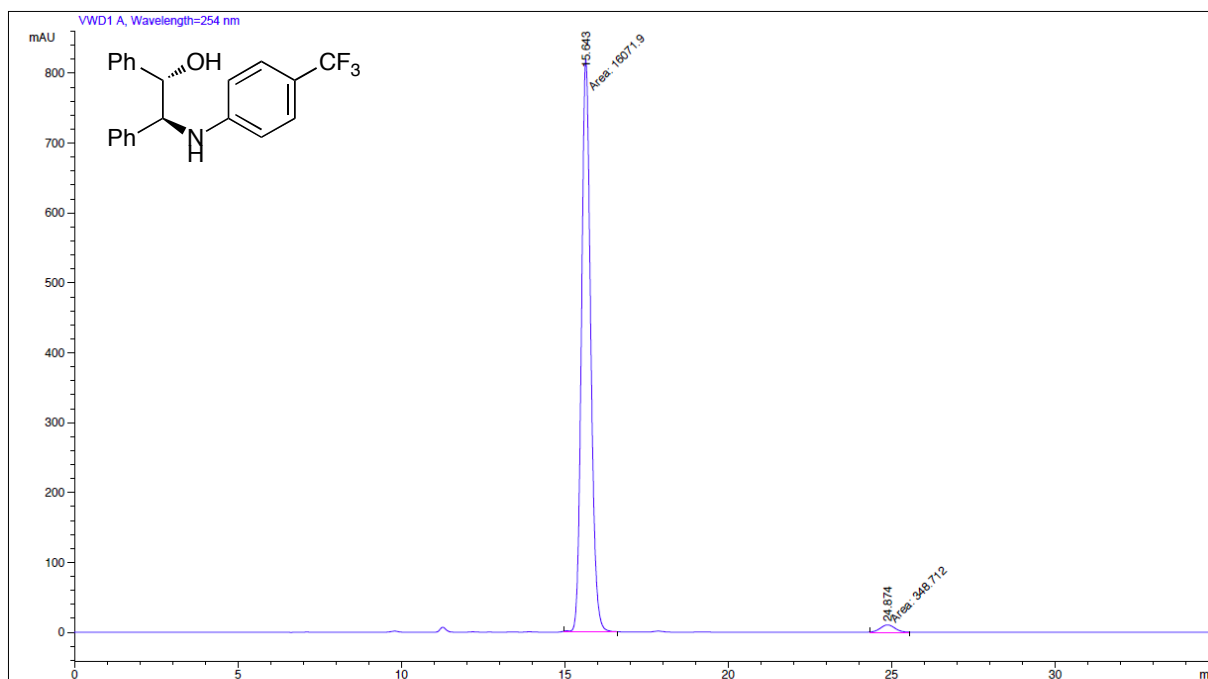

Signal 1: VWD1 A, Wavelength=254 nm

| Peak # | RetTime [min] | Type | Width [min] | Area mAU  | Area *s   | Height [mAU] | Area % |
|--------|---------------|------|-------------|-----------|-----------|--------------|--------|
| 1      | 15.643        | MM   | 0.3273      | 1.60719e4 | 818.32874 | 97.8764      |        |
| 2      | 24.874        | MM   | 0.5373      | 348.71204 | 10.81608  | 2.1236       |        |

Totals : 1.64206e4 829.14482



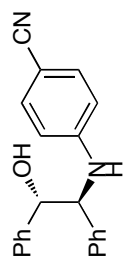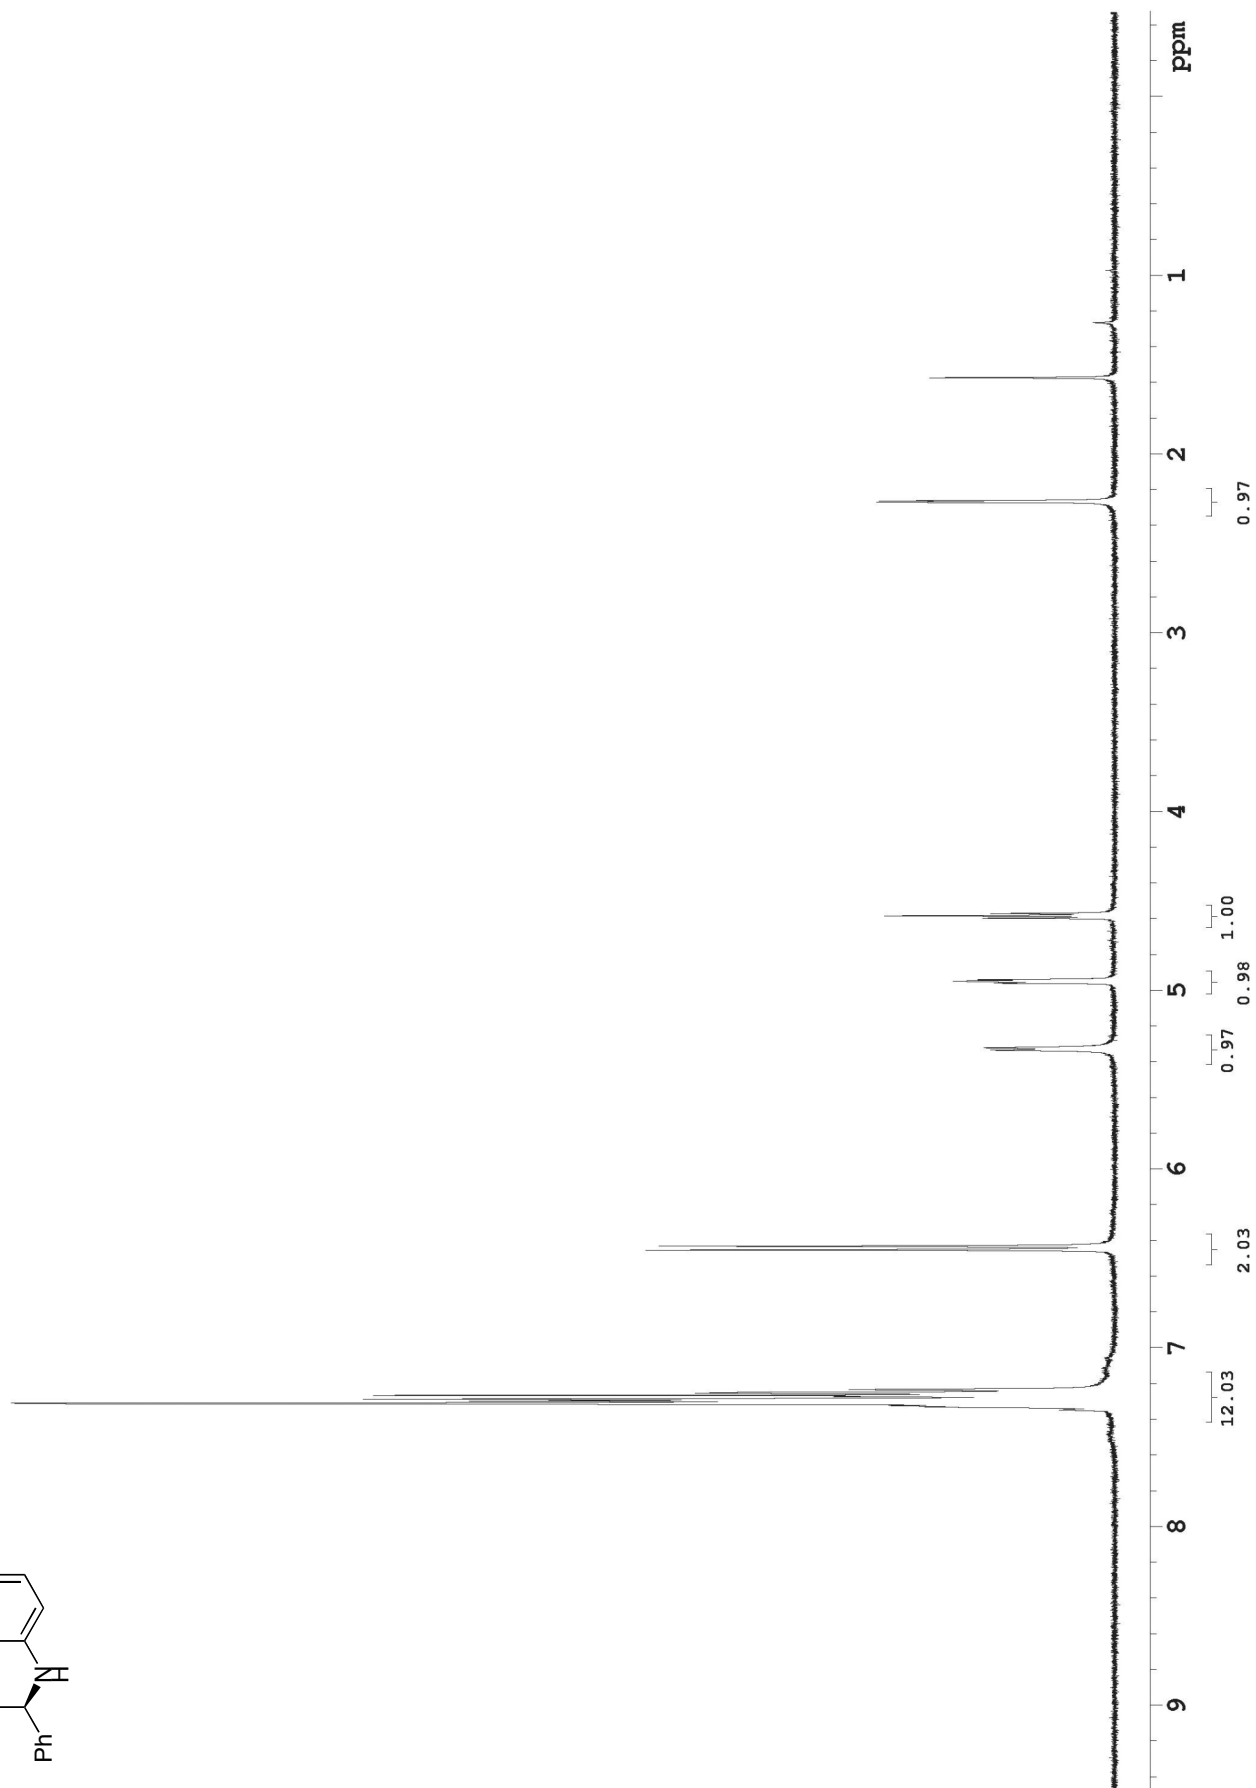

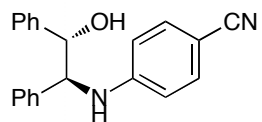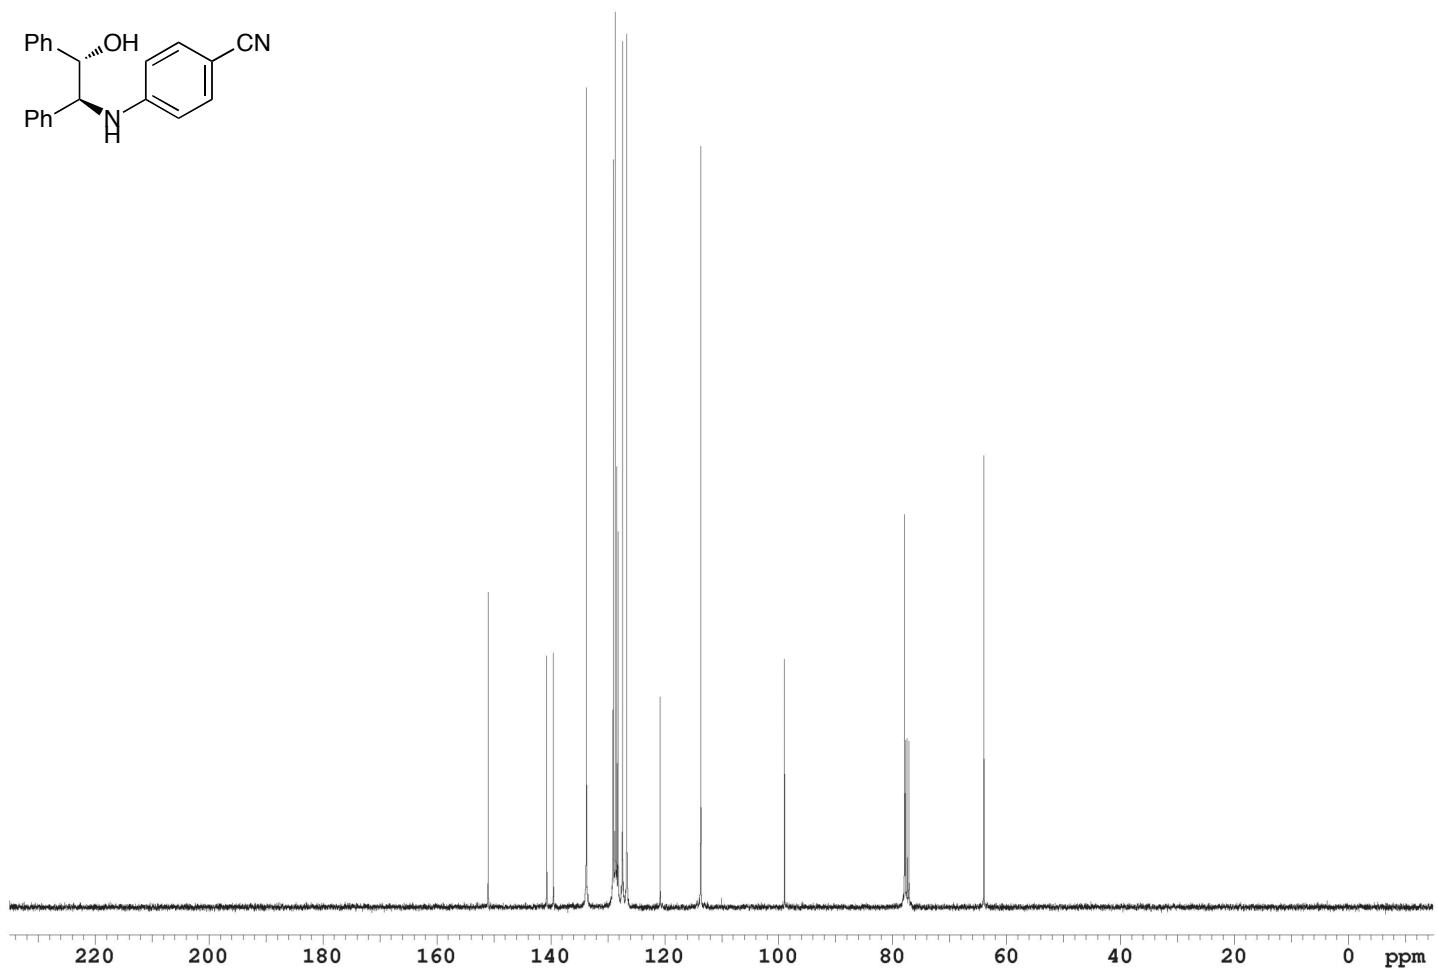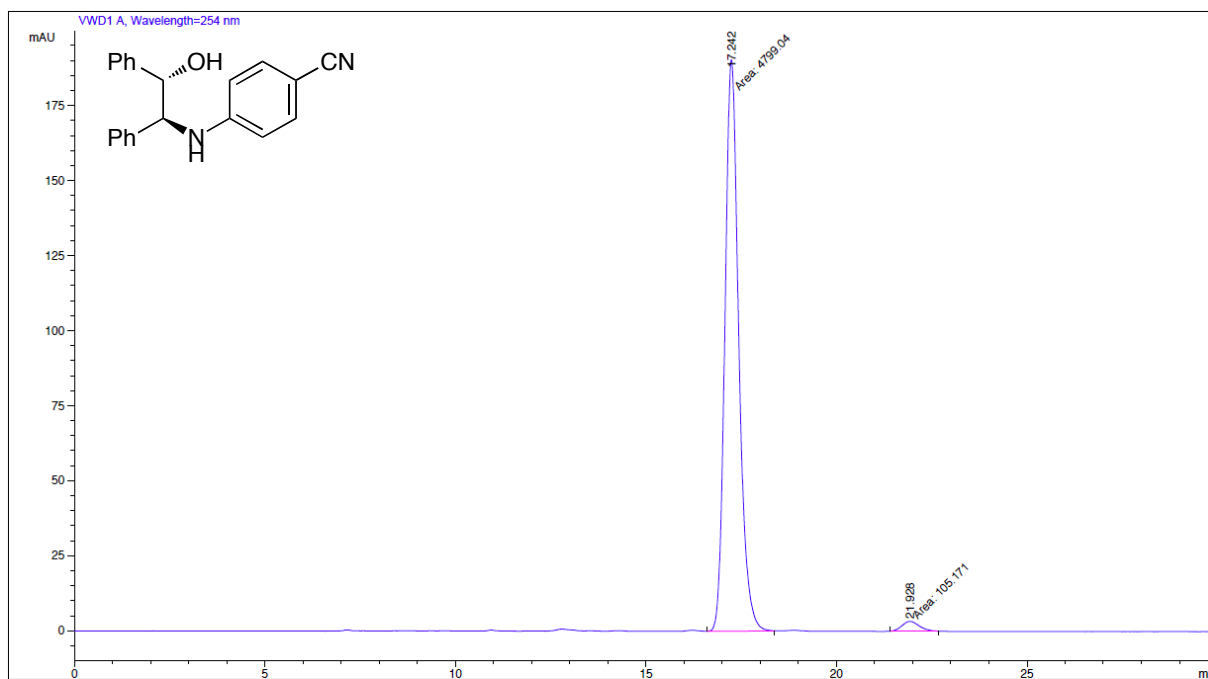

Signal 1: VWD1 A, Wavelength=254 nm

| Peak # | RetTime [min] | Type | Width [min] | Area mAU   | Area *s   | Height [mAU] | Area %  |
|--------|---------------|------|-------------|------------|-----------|--------------|---------|
| 1      | 17.242        | MM   | 0.4201      | 4799.03711 | 190.38780 | 190.38780    | 97.8555 |
| 2      | 21.928        | MM   | 0.5324      | 105.17061  | 3.29237   | 3.29237      | 2.1445  |

Totals : 4904.20772 193.68017

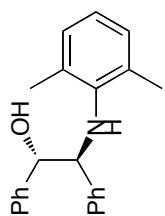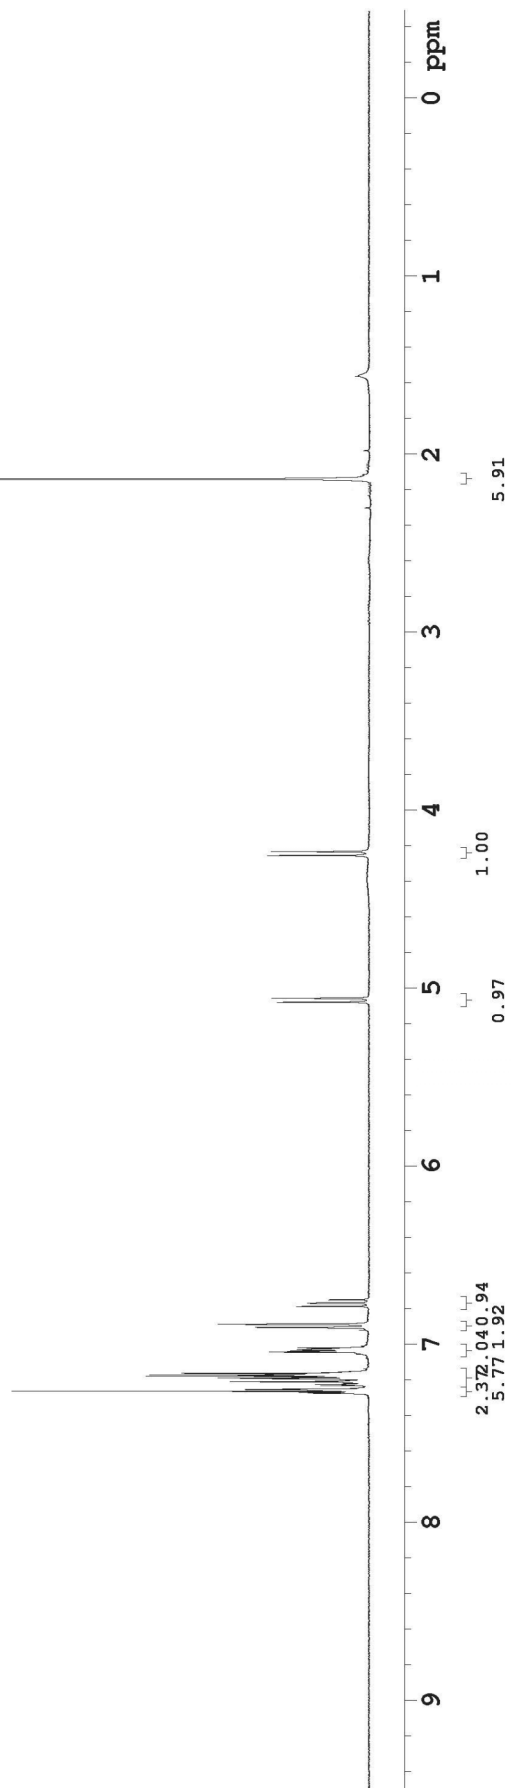

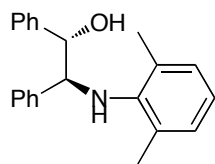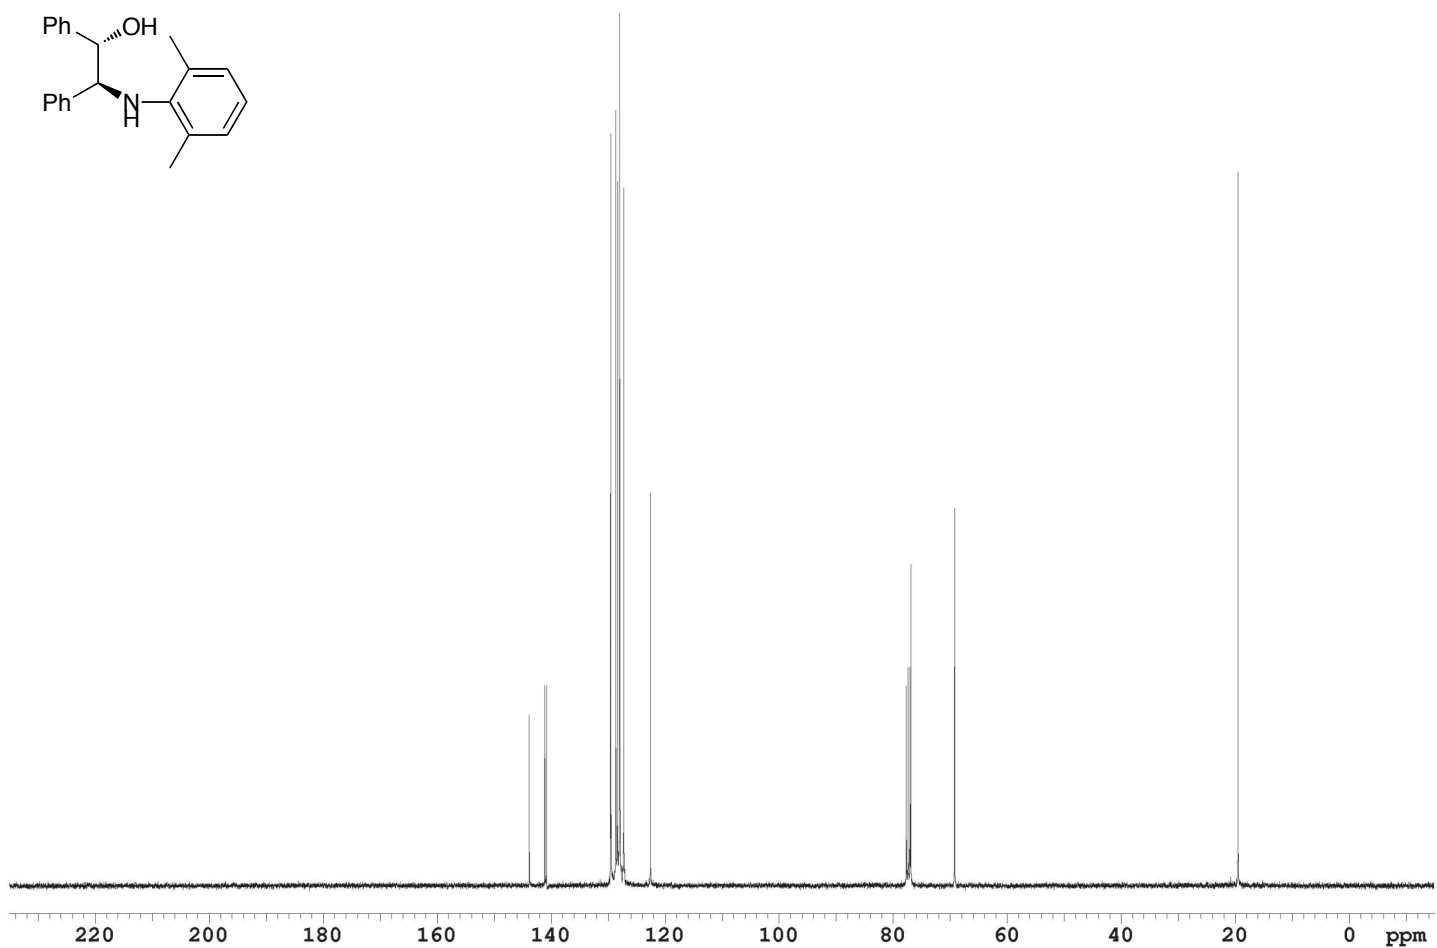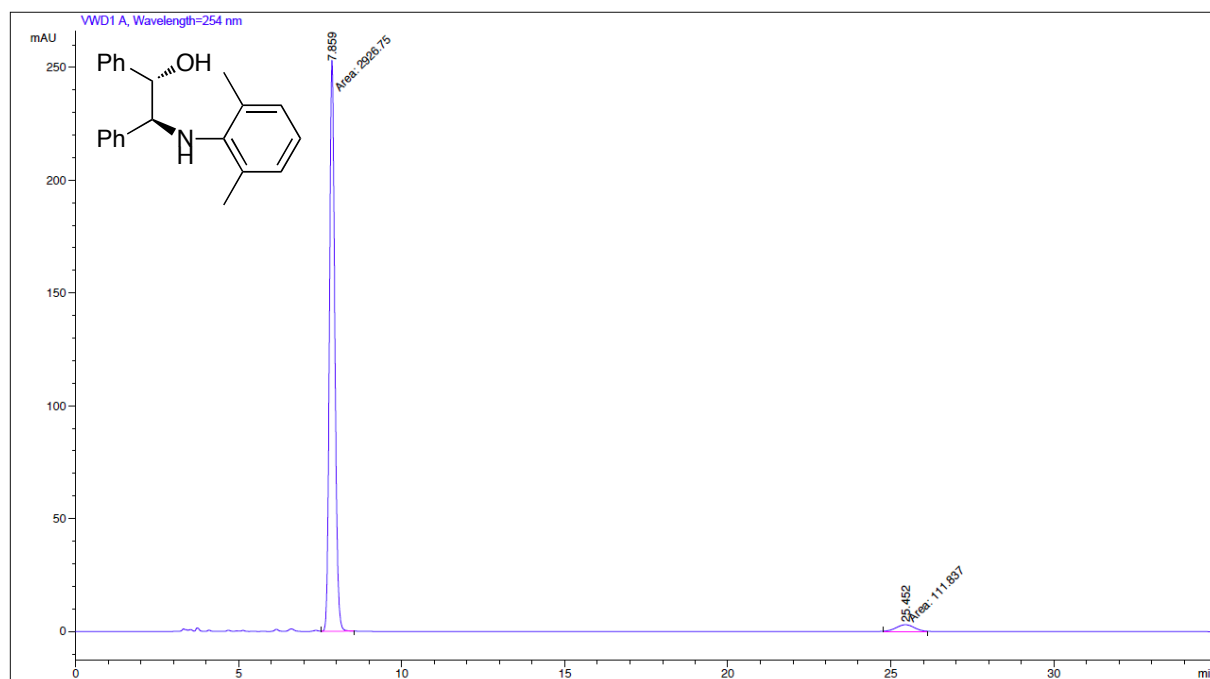

Signal 1: VWD1 A, Wavelength=254 nm

| Peak # | RetTime [min] | Type | Width [min] | Area mAU   | Area *s   | Height [mAU] | Area %  |
|--------|---------------|------|-------------|------------|-----------|--------------|---------|
| 1      | 7.859         | MM   | 0.1926      | 2926.74854 | 253.25517 | 253.25517    | 96.3194 |
| 2      | 25.452        | MM   | 0.6356      | 111.83679  | 2.93254   | 2.93254      | 3.6806  |

Totals : 3038.58533 256.18772

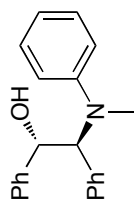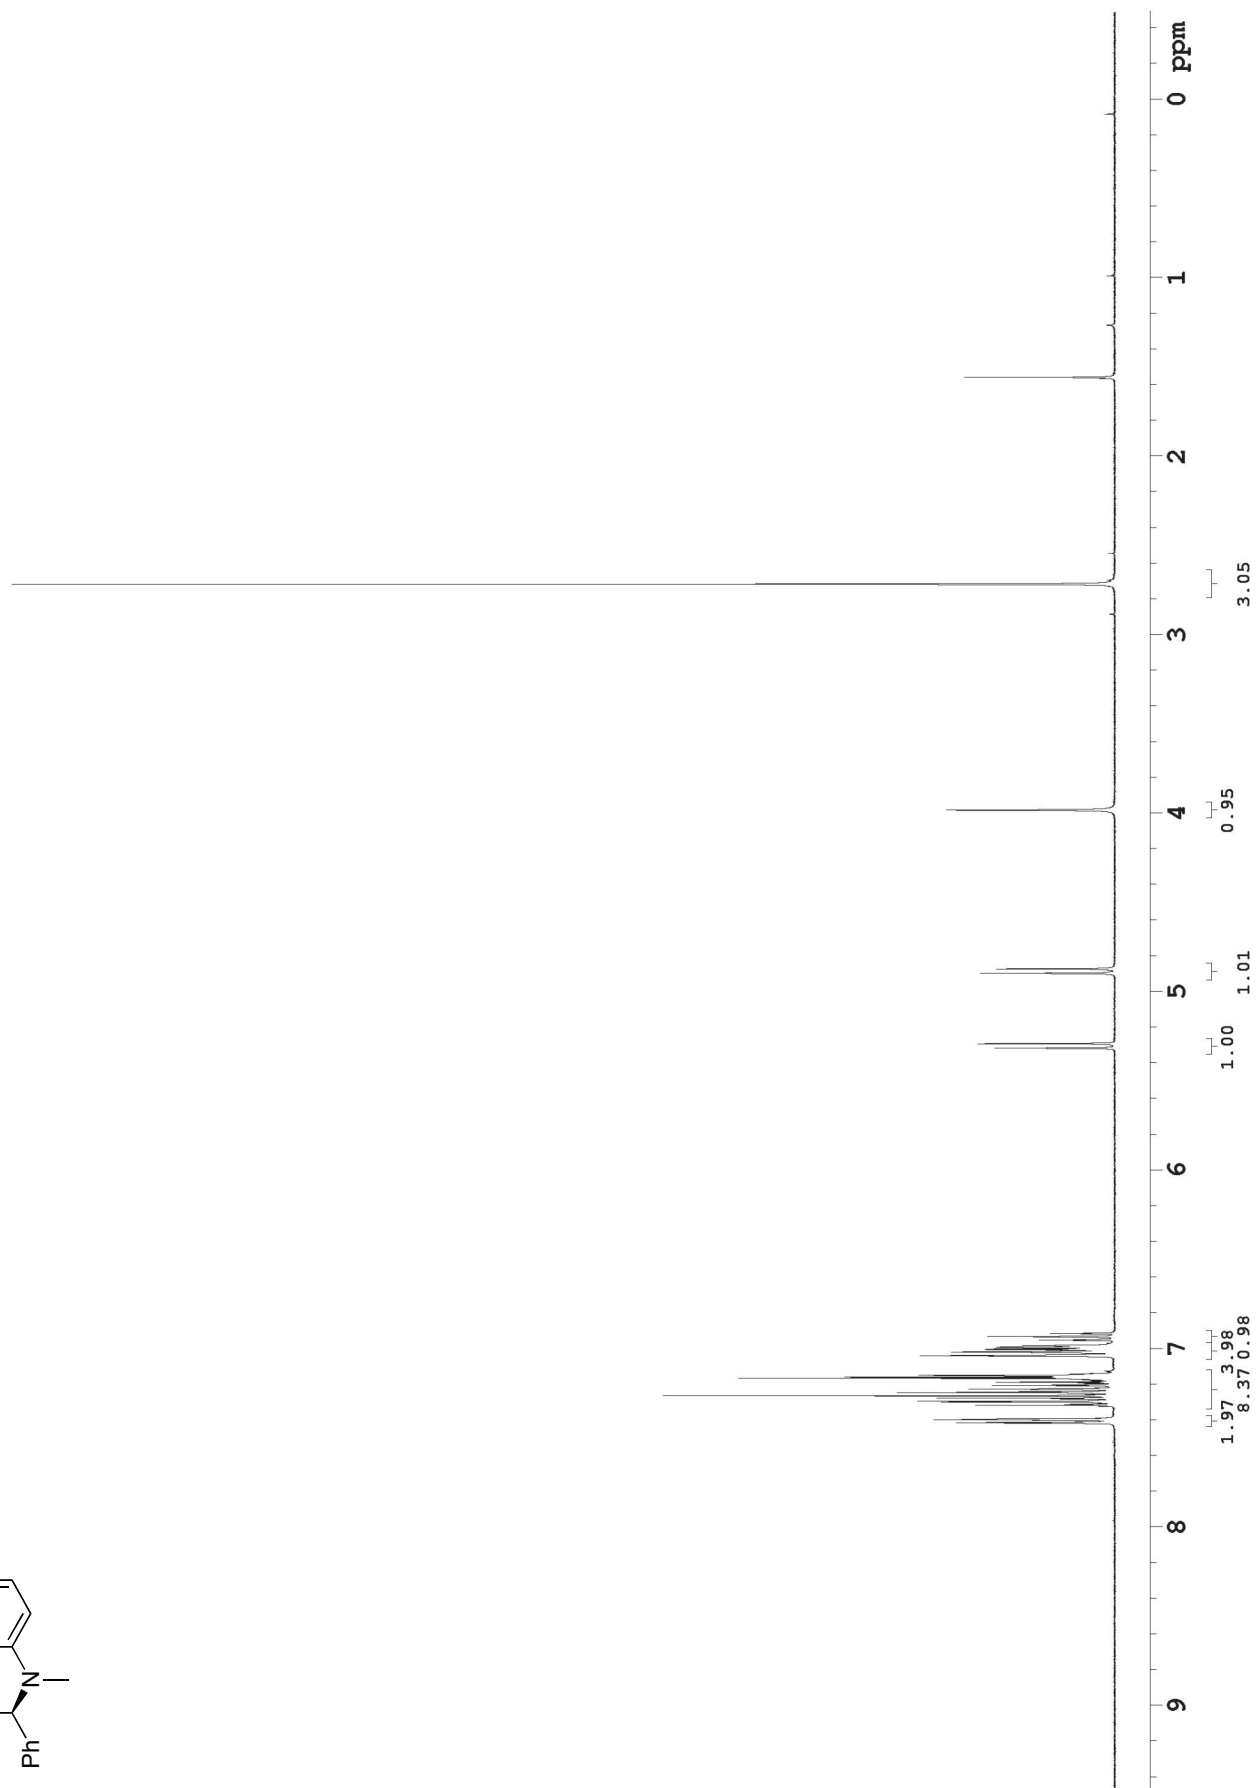

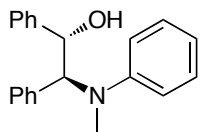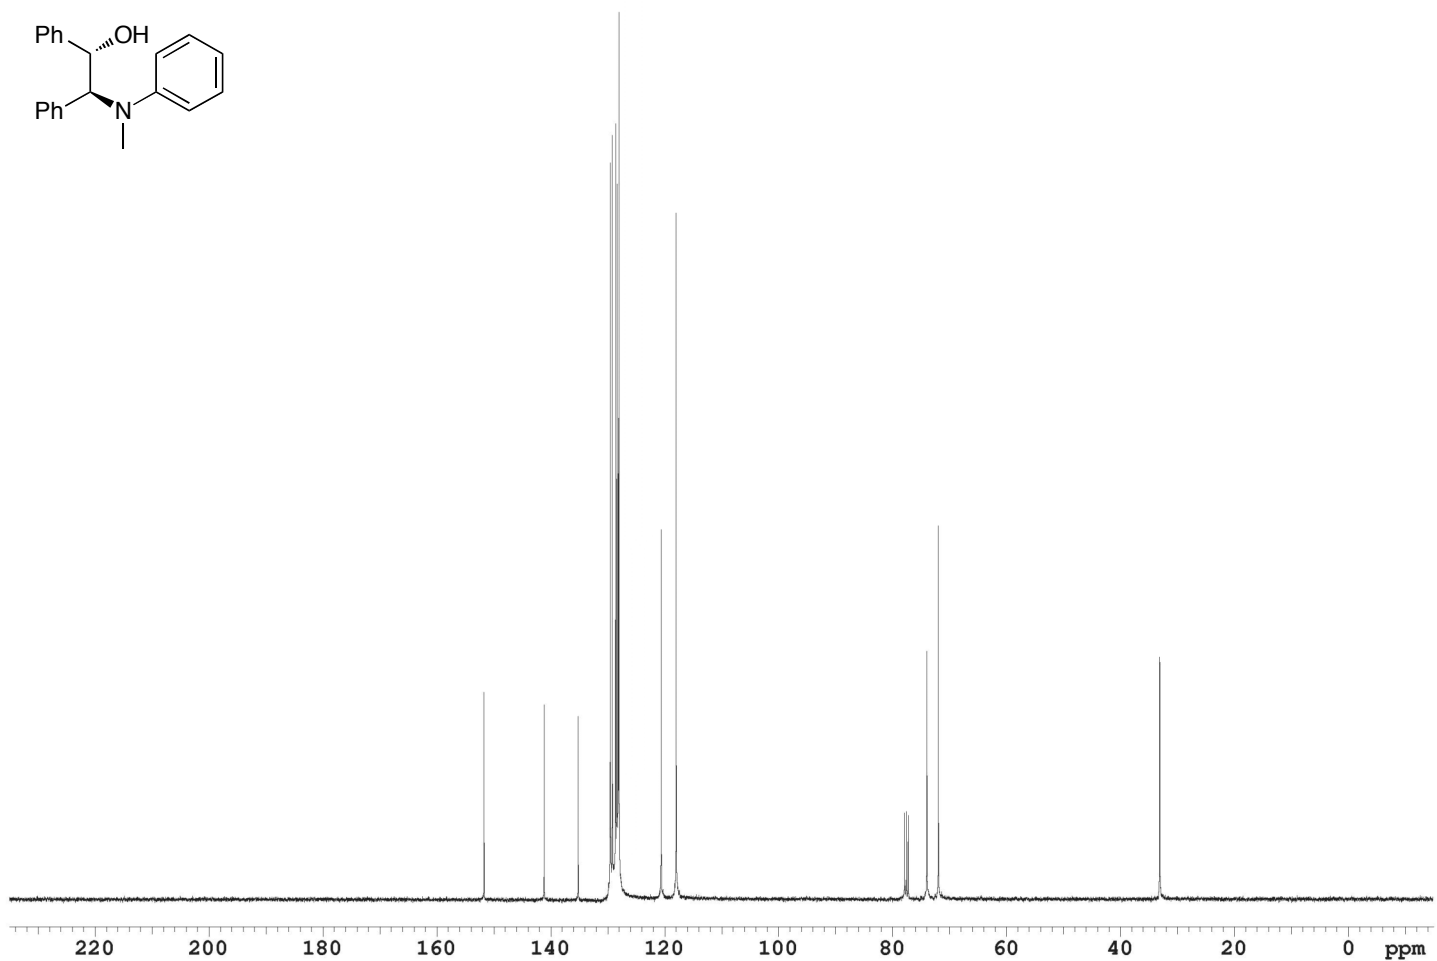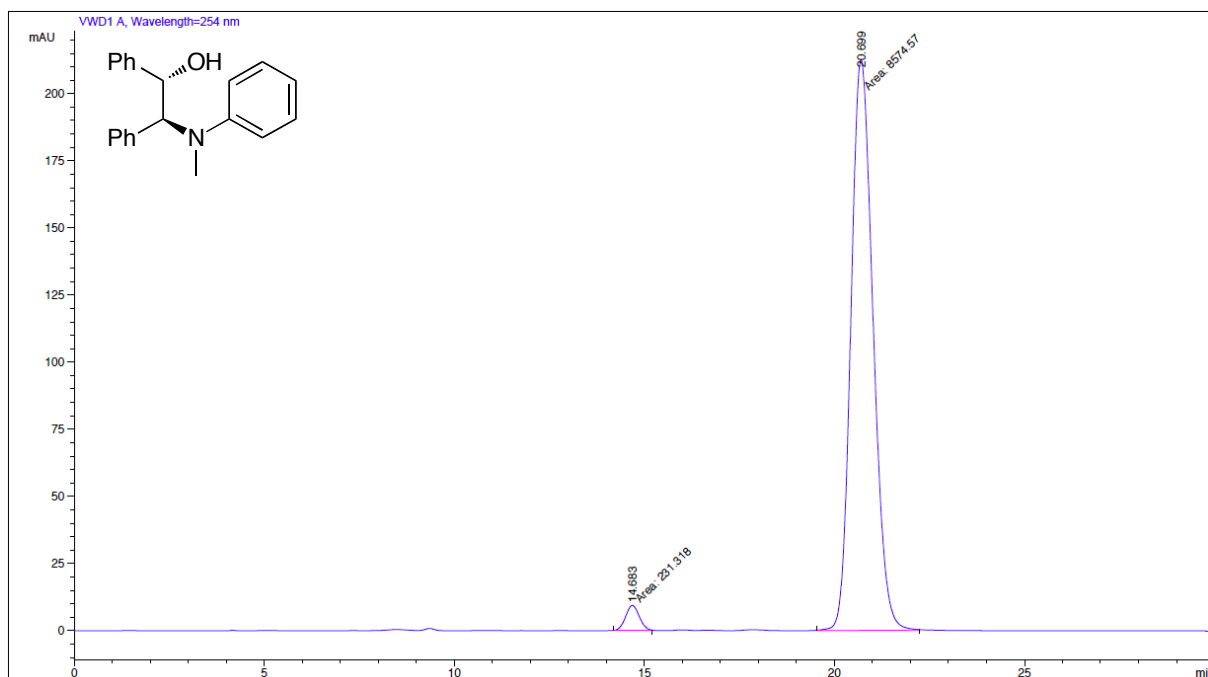

Signal 1: VWD1 A, Wavelength=254 nm

| Peak # | RetTime [min] | Type | Width [min] | Area mAU*s | Height [mAU] | Area %  |
|--------|---------------|------|-------------|------------|--------------|---------|
| 1      | 14.683        | MM   | 0.4159      | 231.31760  | 9.27047      | 2.6269  |
| 2      | 20.699        | MM   | 0.6723      | 8574.57324 | 212.56267    | 97.3731 |

Totals : 8805.89084 221.83314

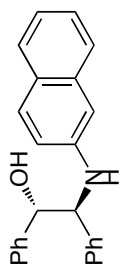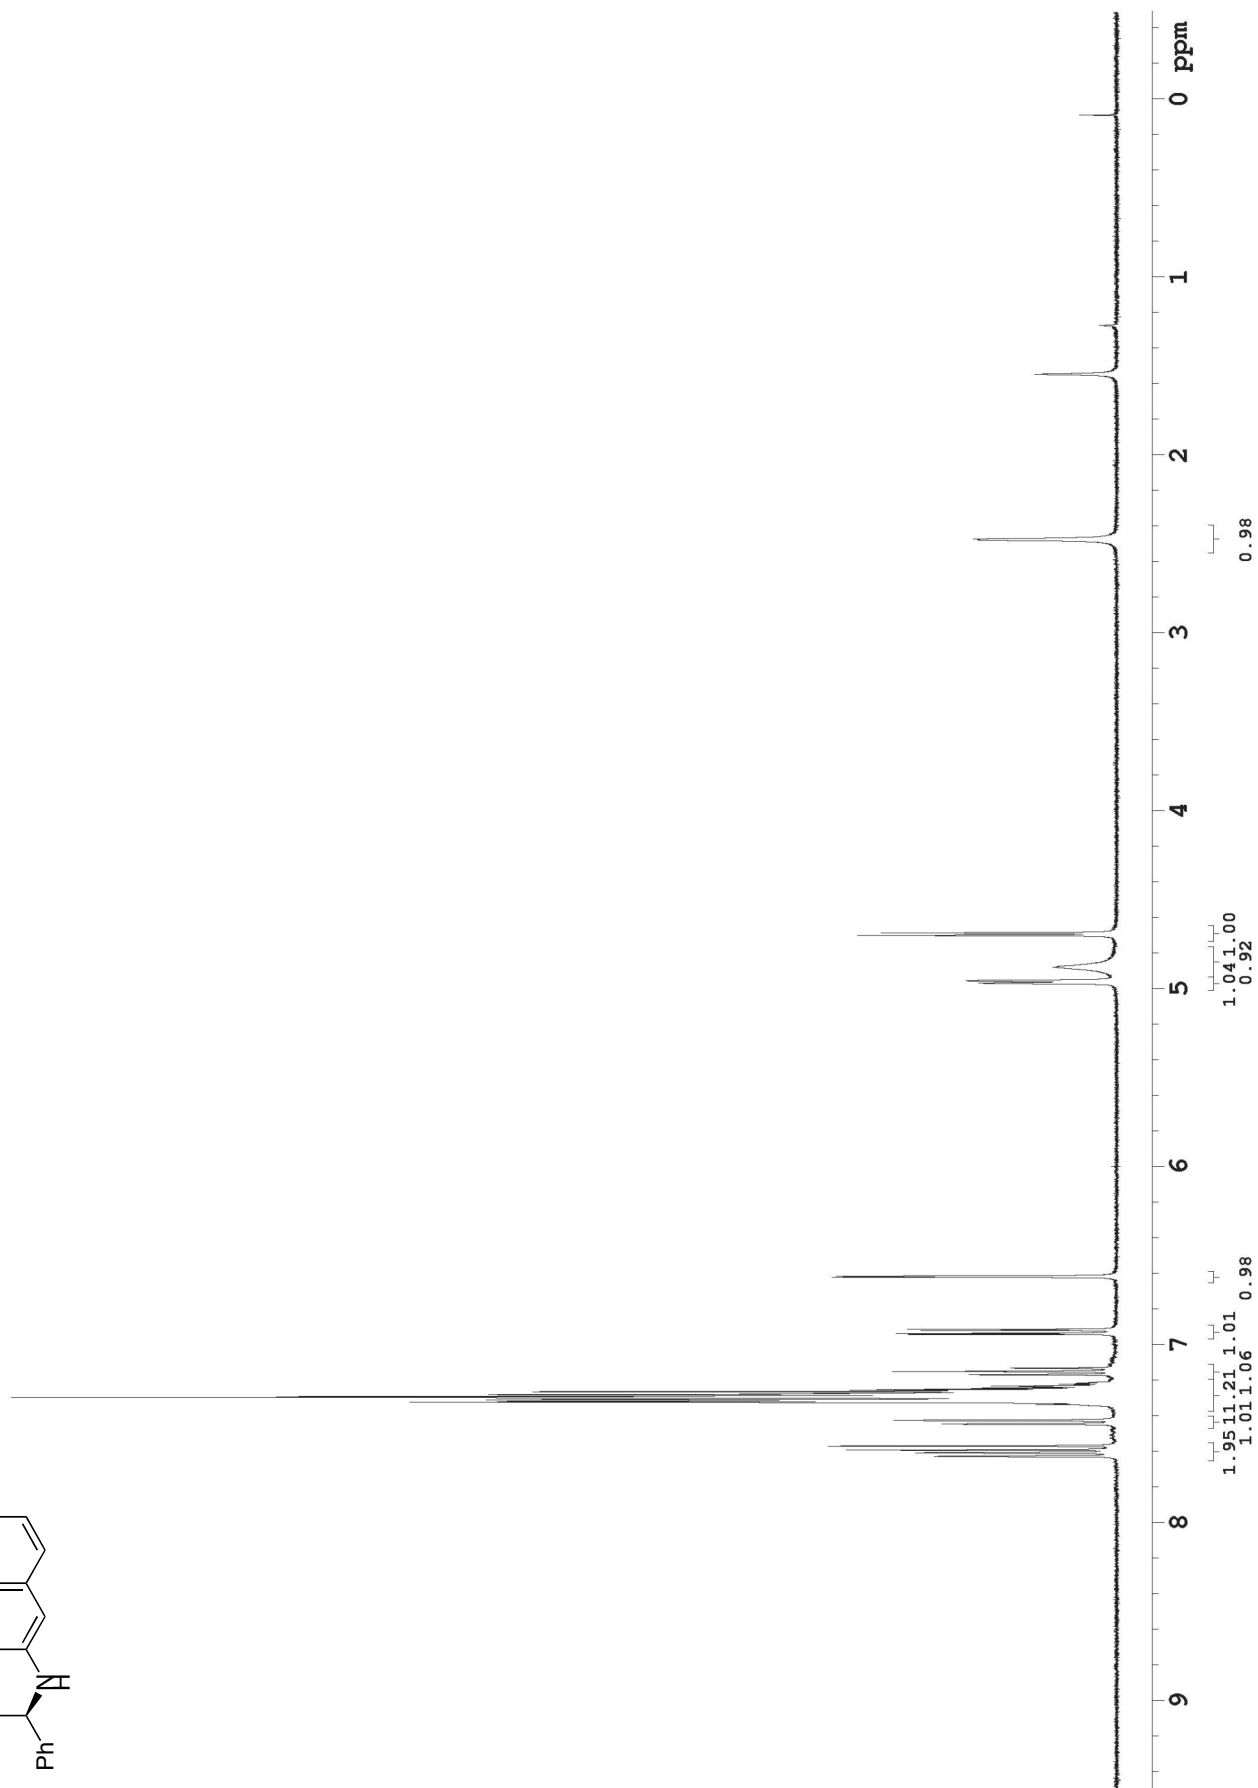



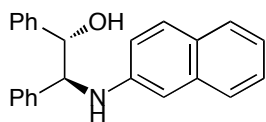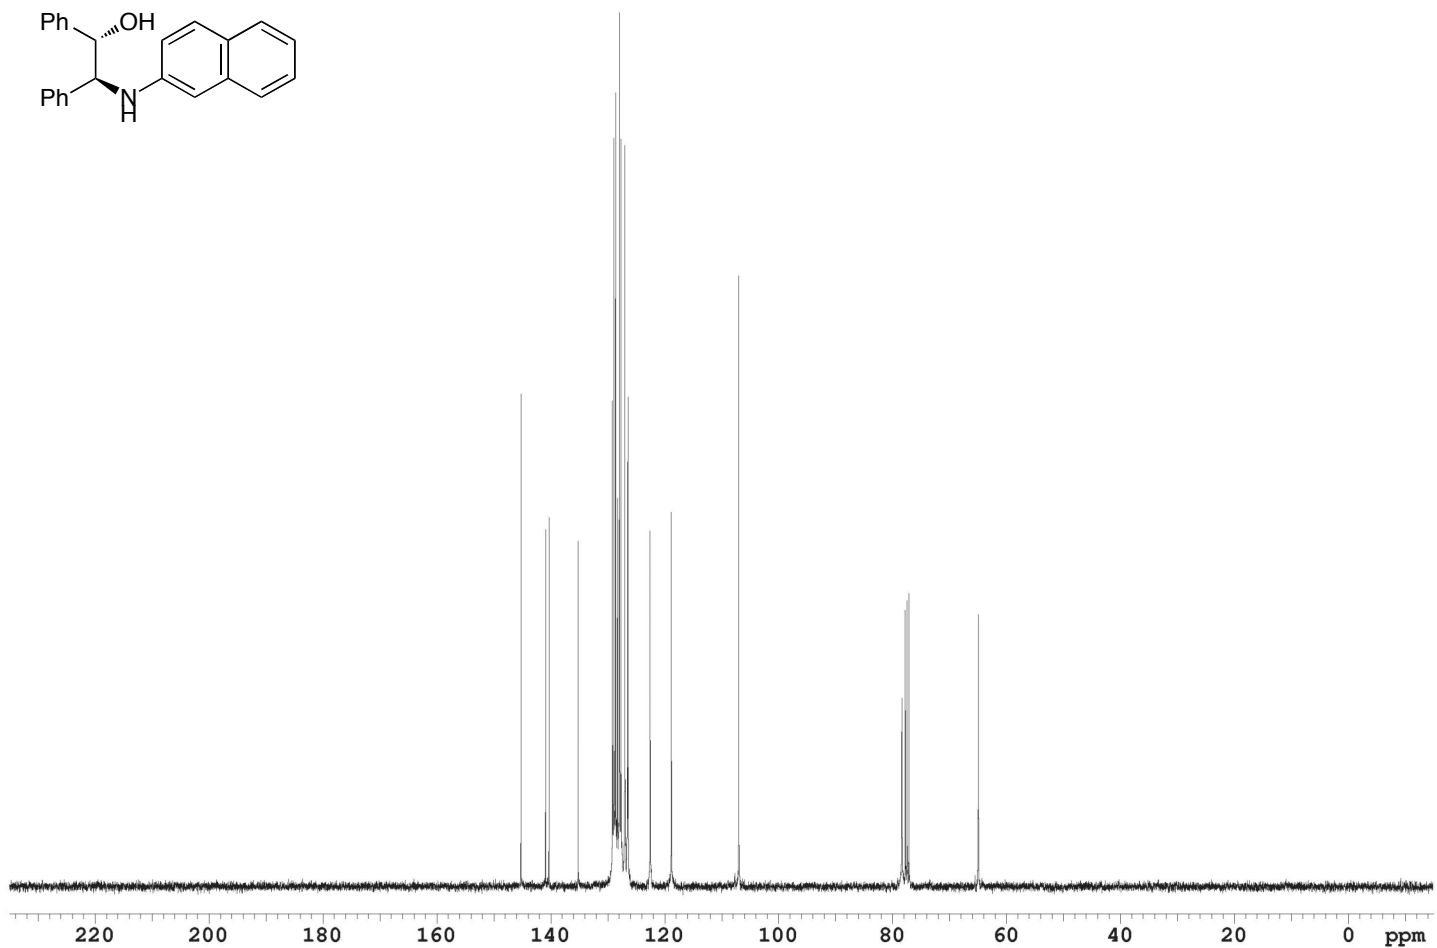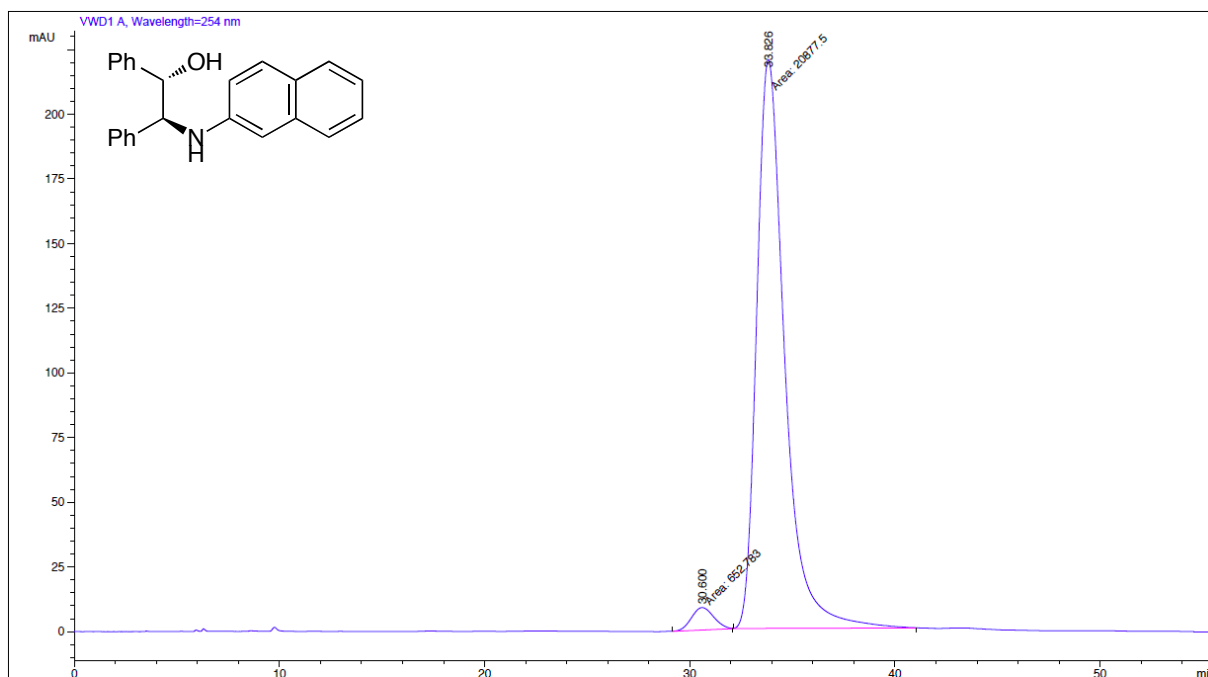

Signal 1: VWD1 A, Wavelength=254 nm

| Peak # | RetTime [min] | Type | Width [min] | Area mAU  | Area *s | Height [mAU] | Area %  |
|--------|---------------|------|-------------|-----------|---------|--------------|---------|
| 1      | 30.600        | MM   | 1.2521      | 652.78339 |         | 8.68936      | 3.0319  |
| 2      | 33.826        | MM   | 1.5828      | 2.08775e4 |         | 219.83984    | 96.9681 |

Totals : 2.15303e4 228.52921

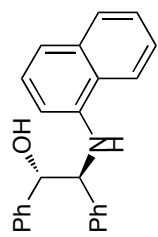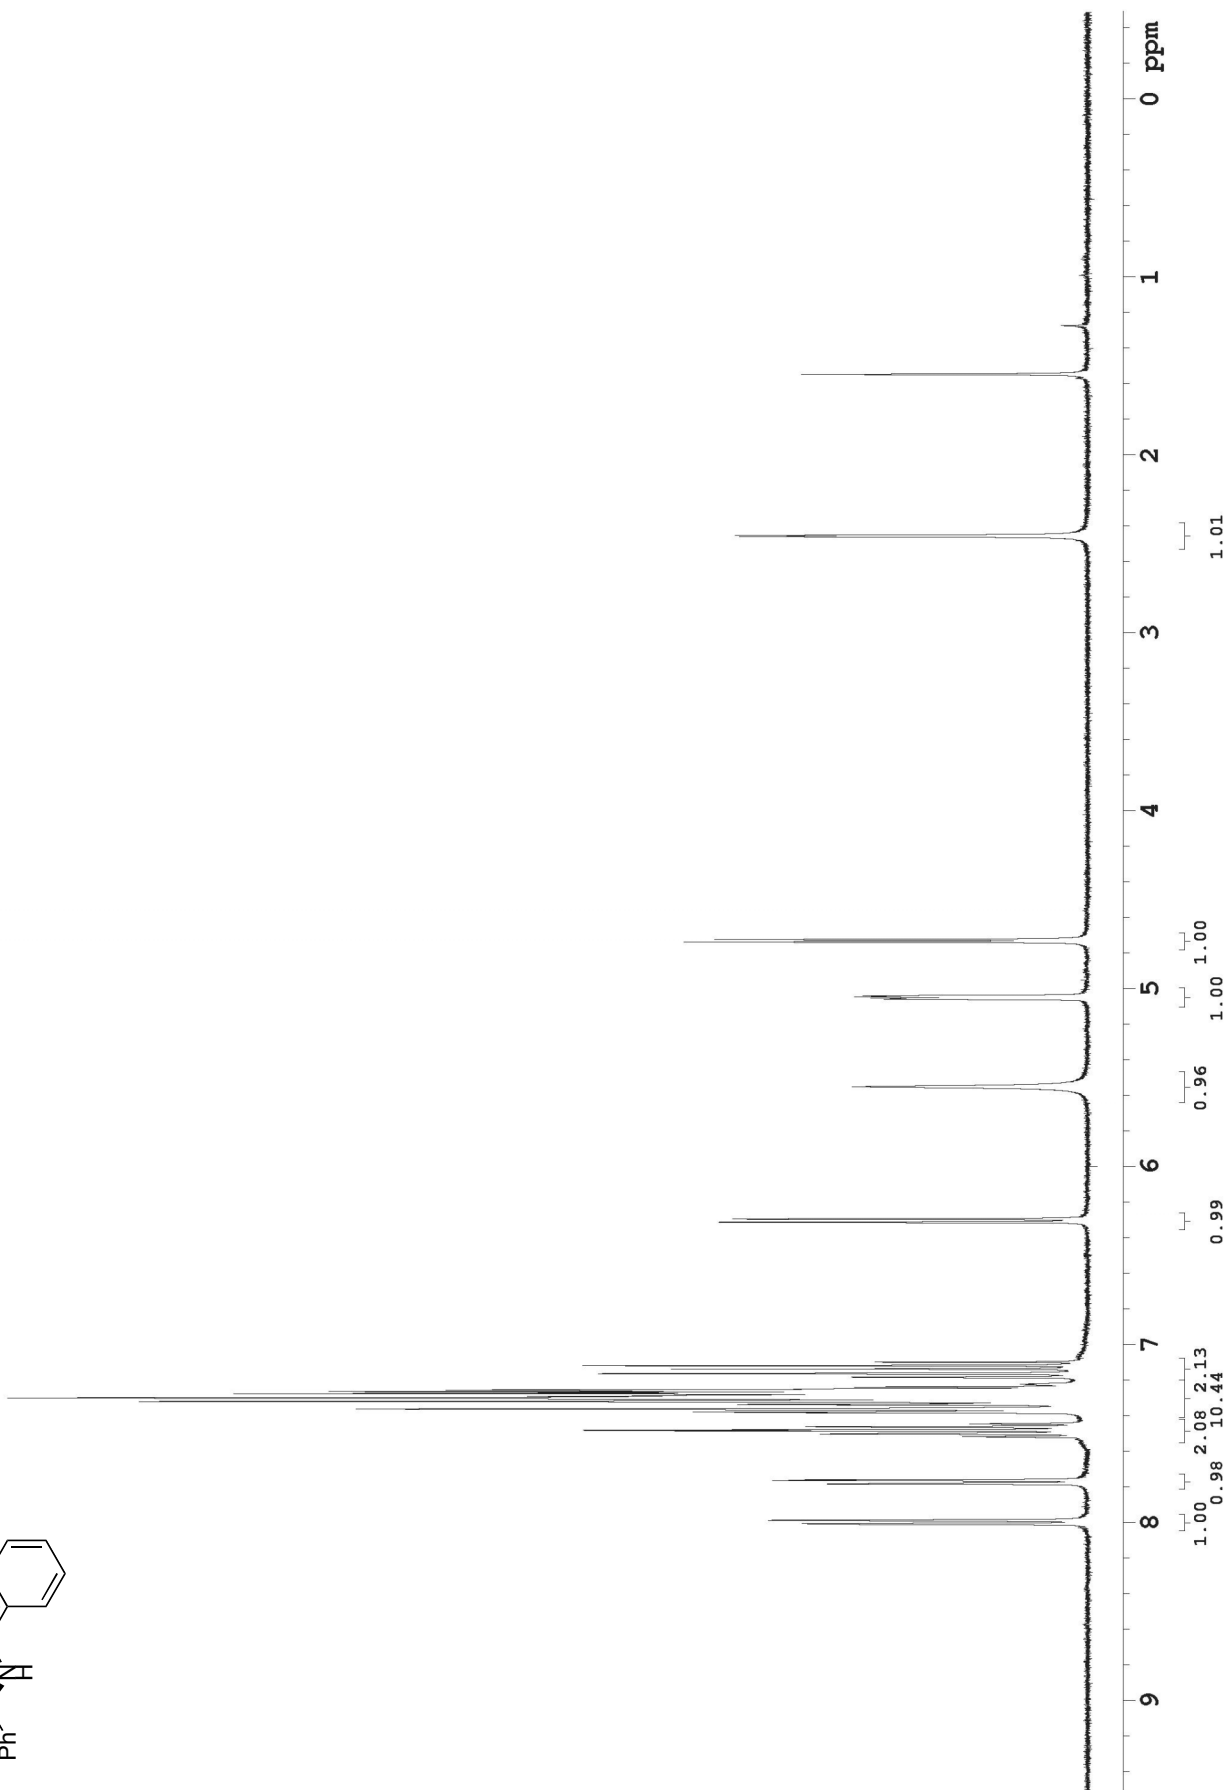

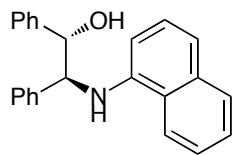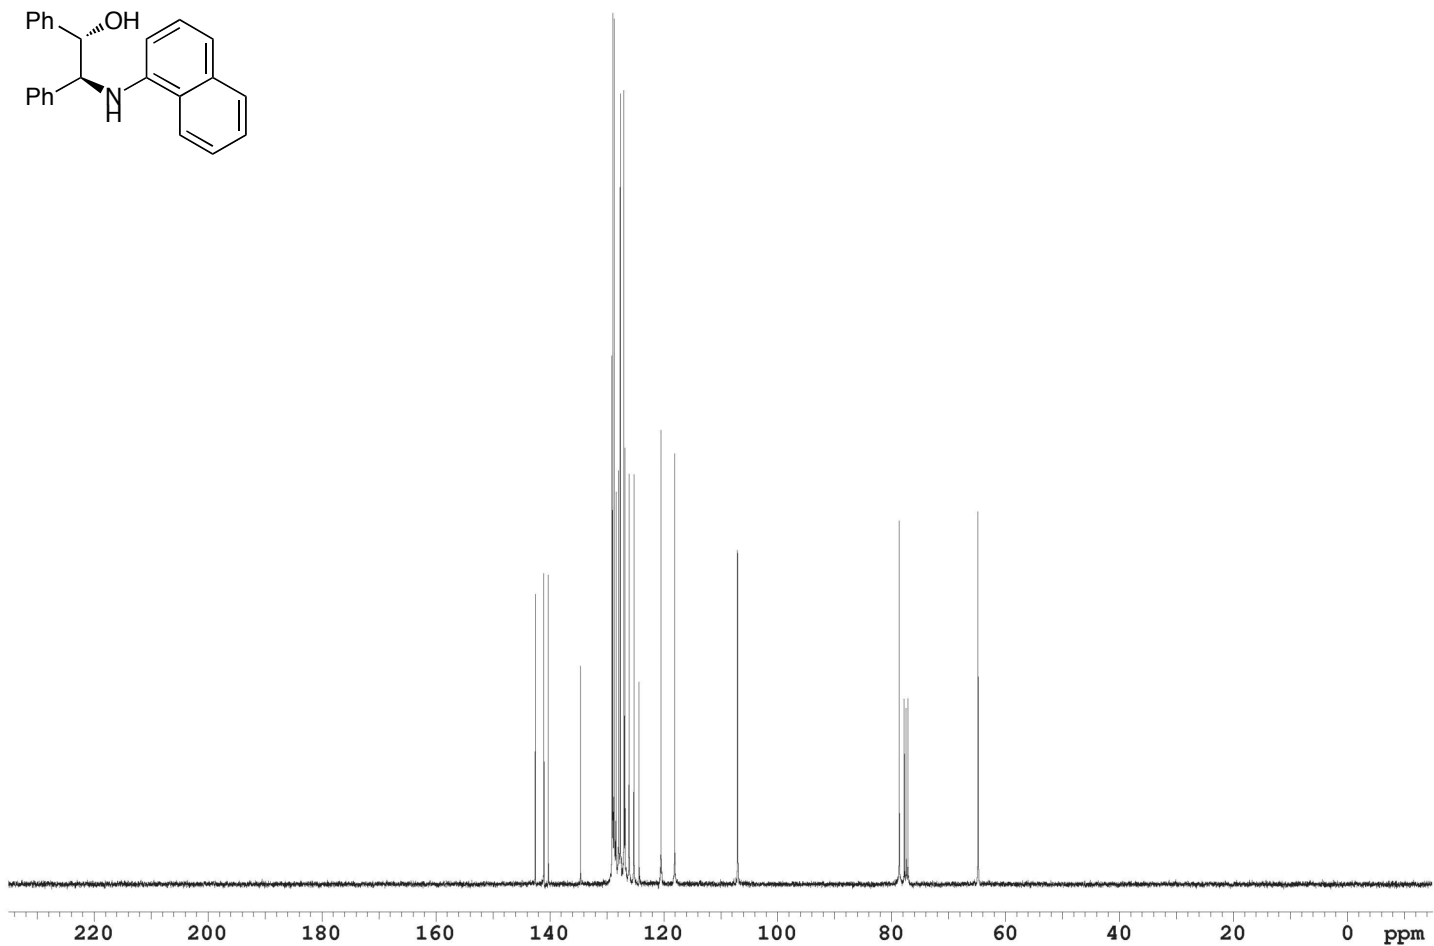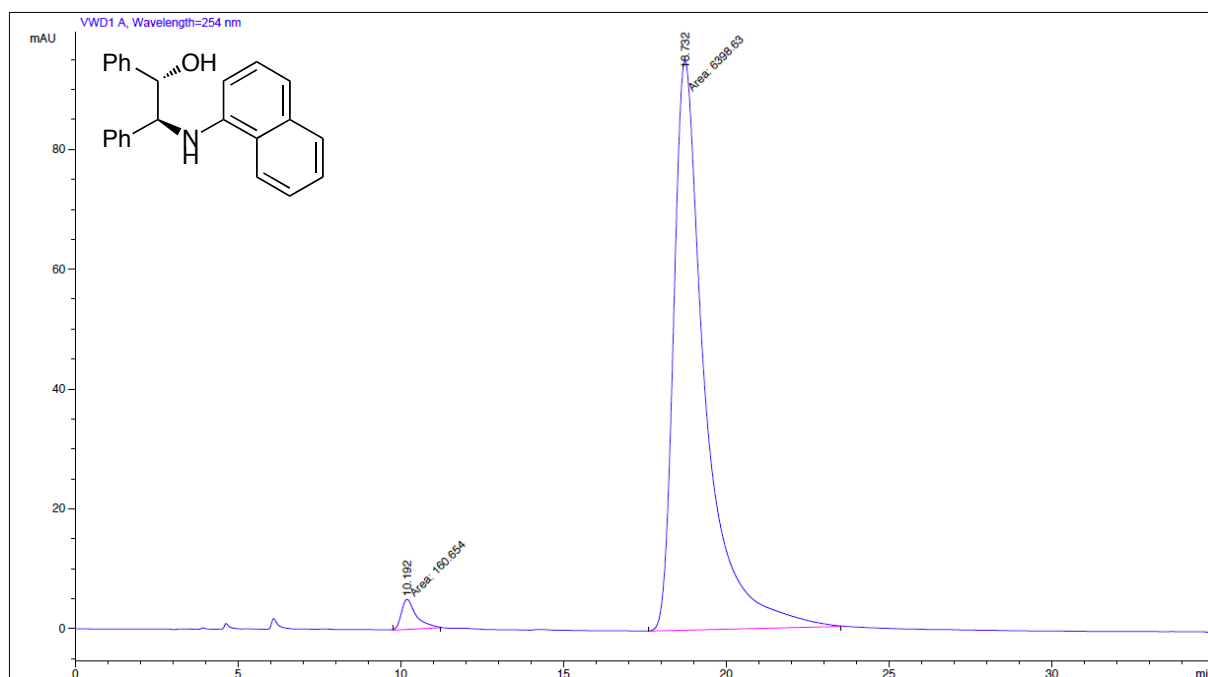

Signal 1: VWD1 A, Wavelength=254 nm

| Peak # | RetTime [min] | Type | Width [min] | Area mAU   | Area *s  | Height [mAU] | Area % |
|--------|---------------|------|-------------|------------|----------|--------------|--------|
| 1      | 10.192        | MM   | 0.5328      | 160.65446  | 5.02566  | 2.4493       |        |
| 2      | 18.732        | MM   | 1.1214      | 6398.63086 | 95.10046 | 97.5507      |        |

Totals : 6559.28532 100.12612

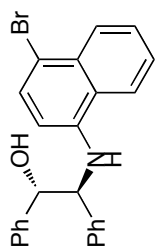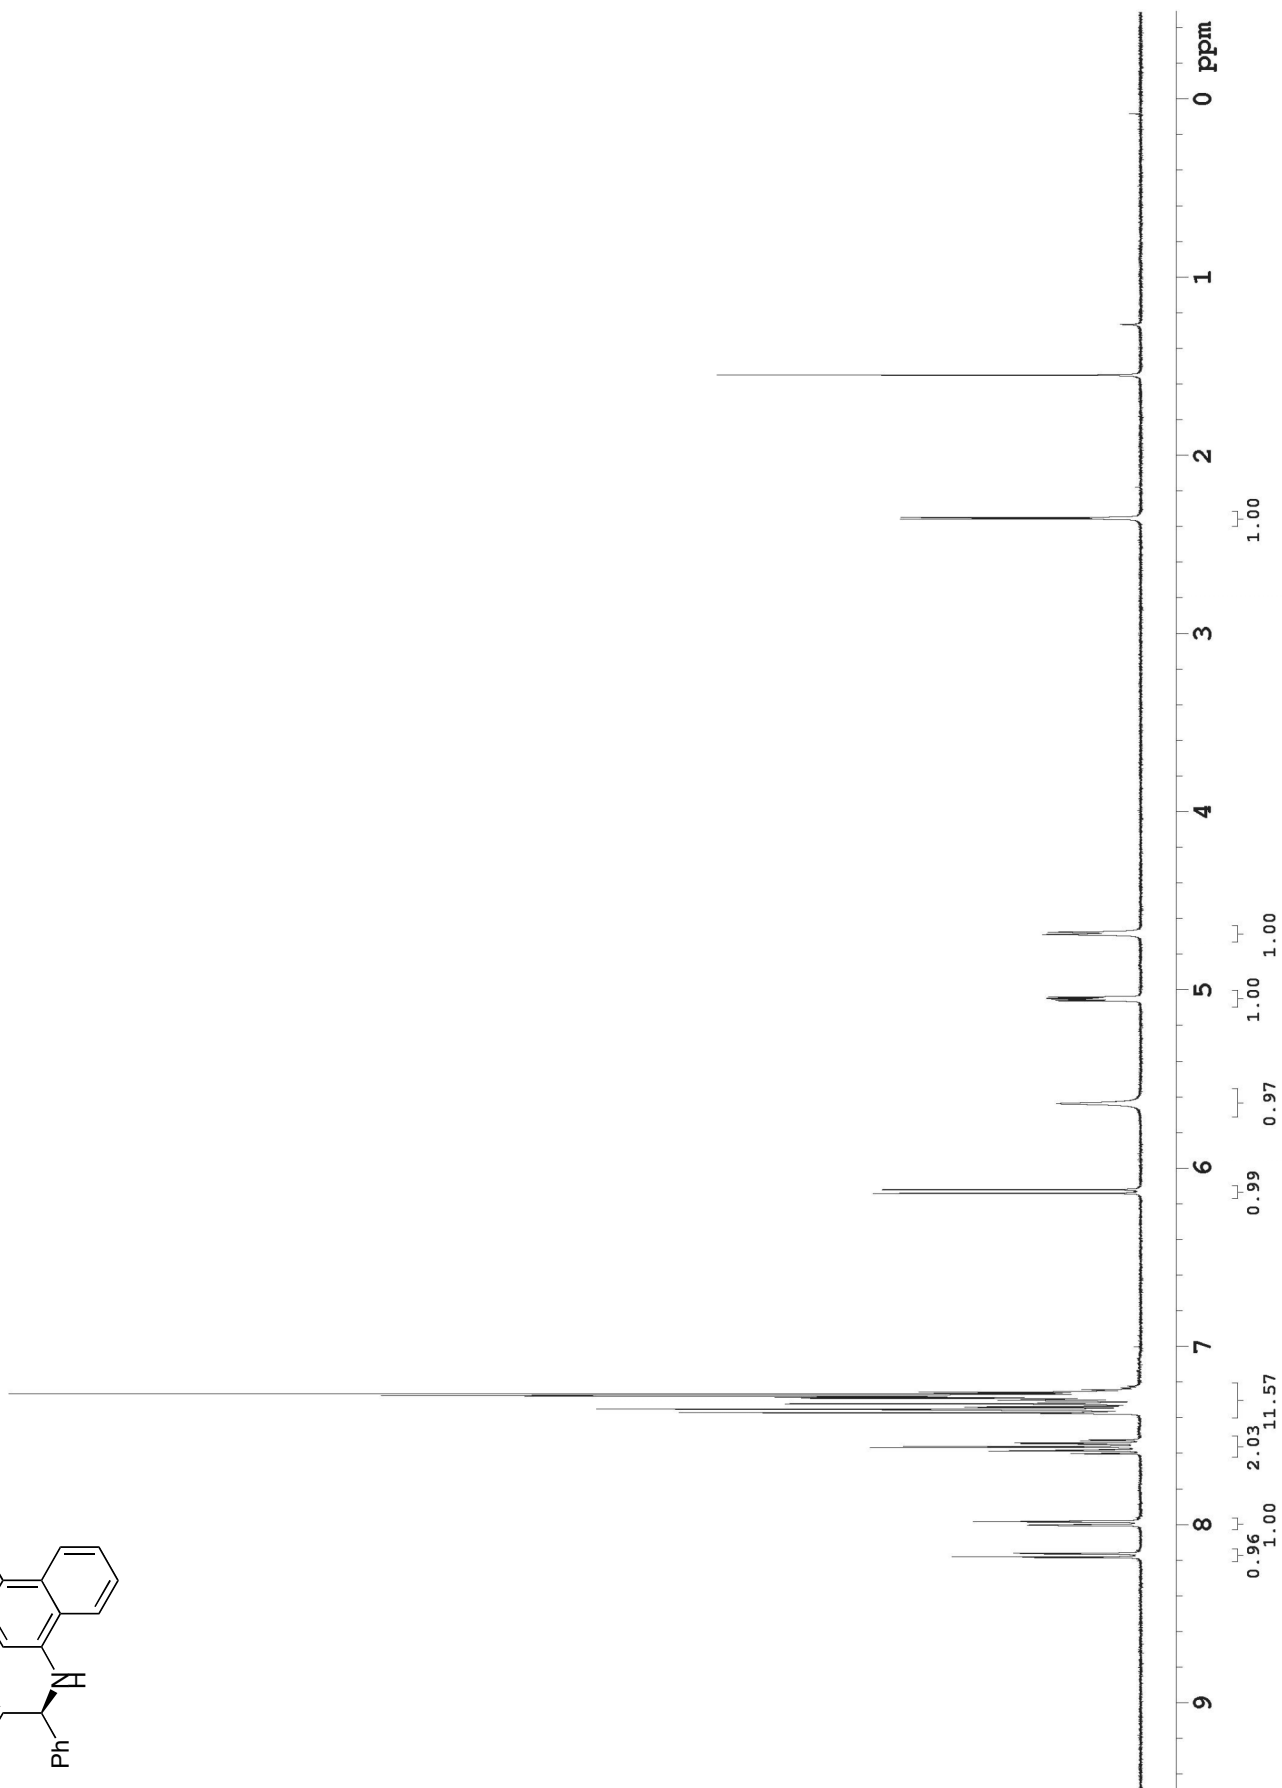

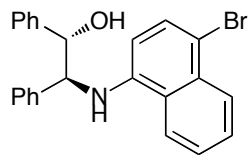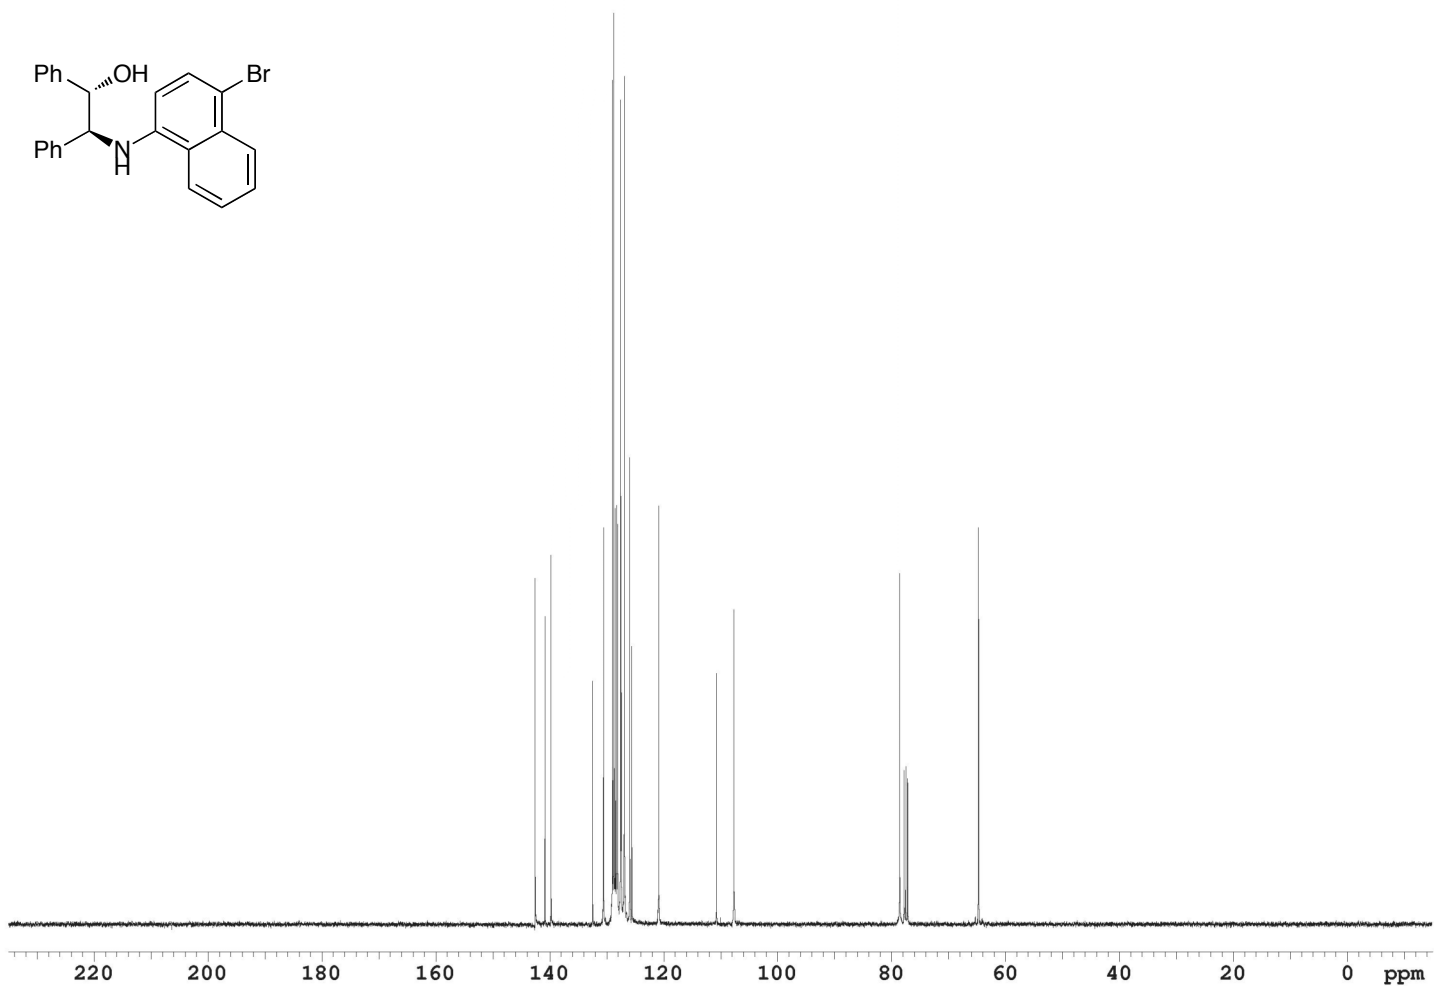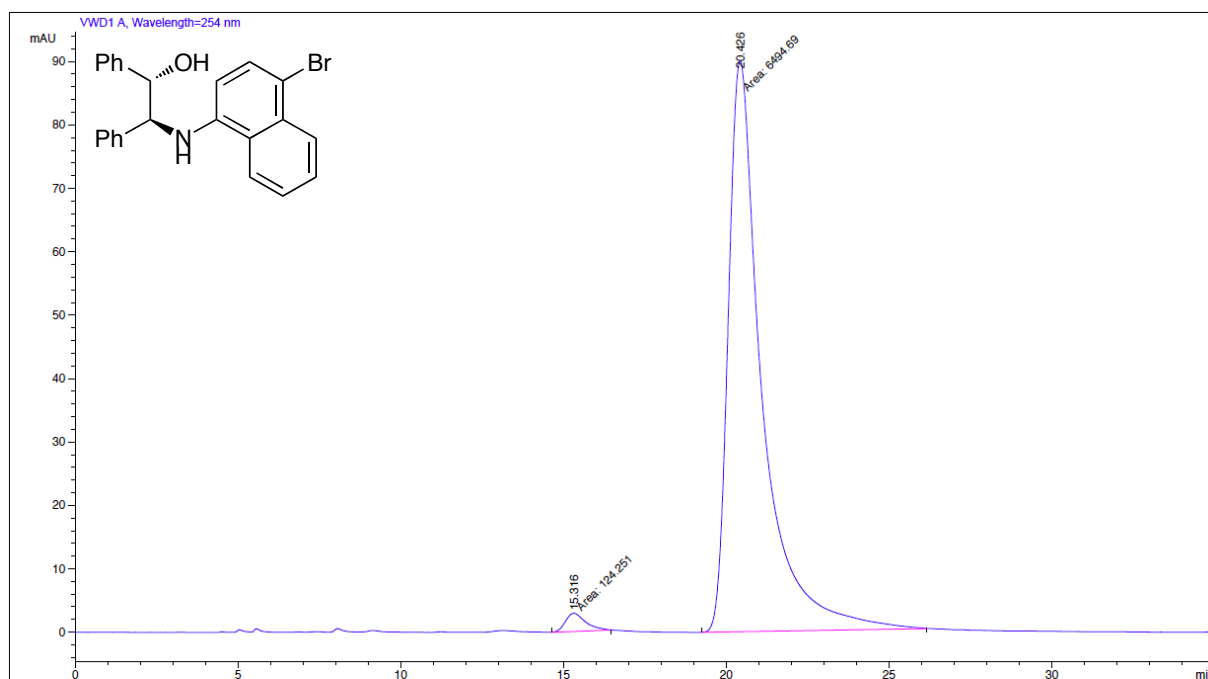

Signal 1: VWD1 A, Wavelength=254 nm

| Peak # | RetTime [min] | Type | Width [min] | Area mAU   | Area *s  | Height [mAU] | Area % |
|--------|---------------|------|-------------|------------|----------|--------------|--------|
| 1      | 15.316        | MM   | 0.7235      | 124.25077  | 2.86234  | 1.8772       |        |
| 2      | 20.426        | MM   | 1.2019      | 6494.68506 | 90.05785 | 98.1228      |        |

Totals : 6618.93583 92.92019

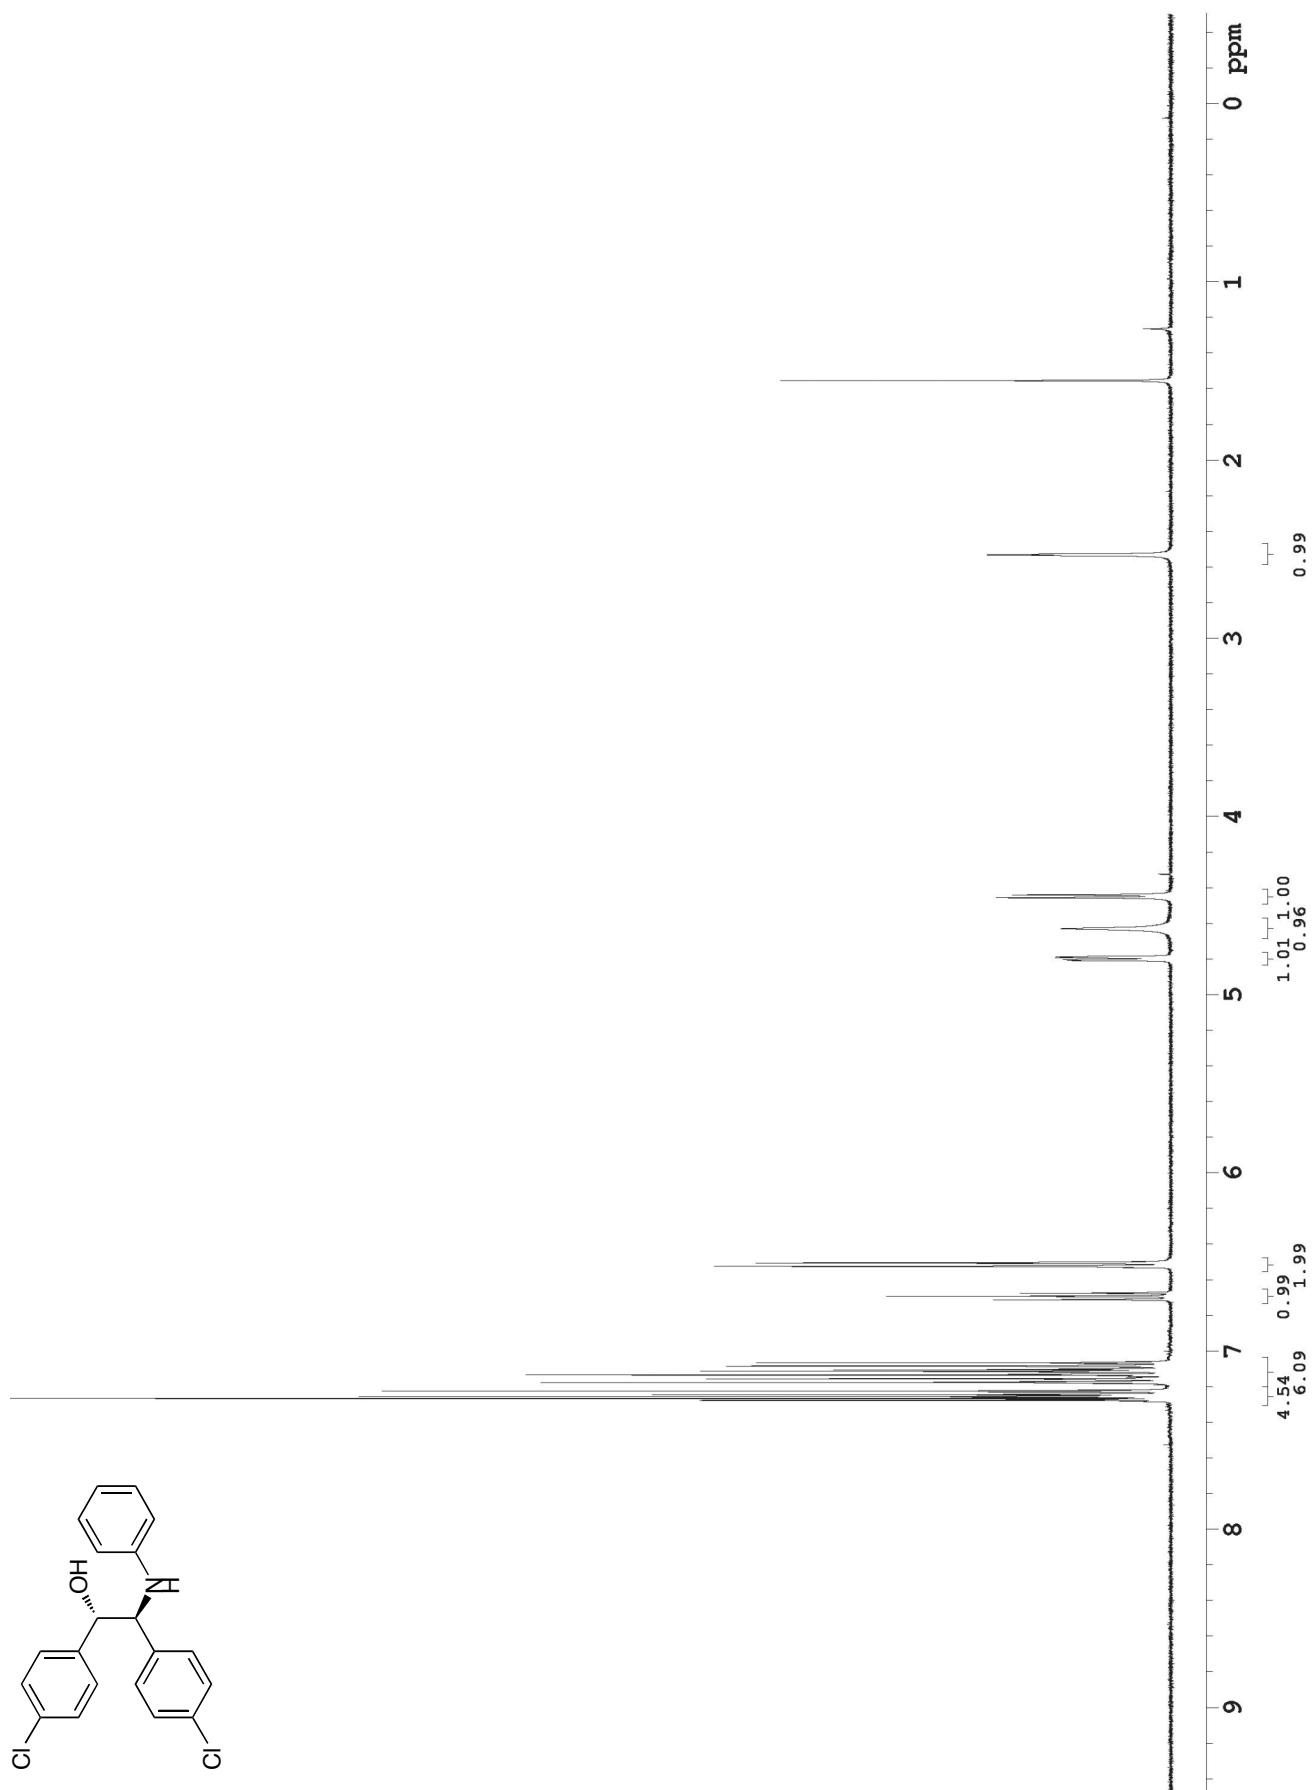

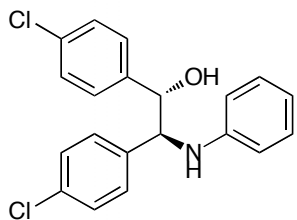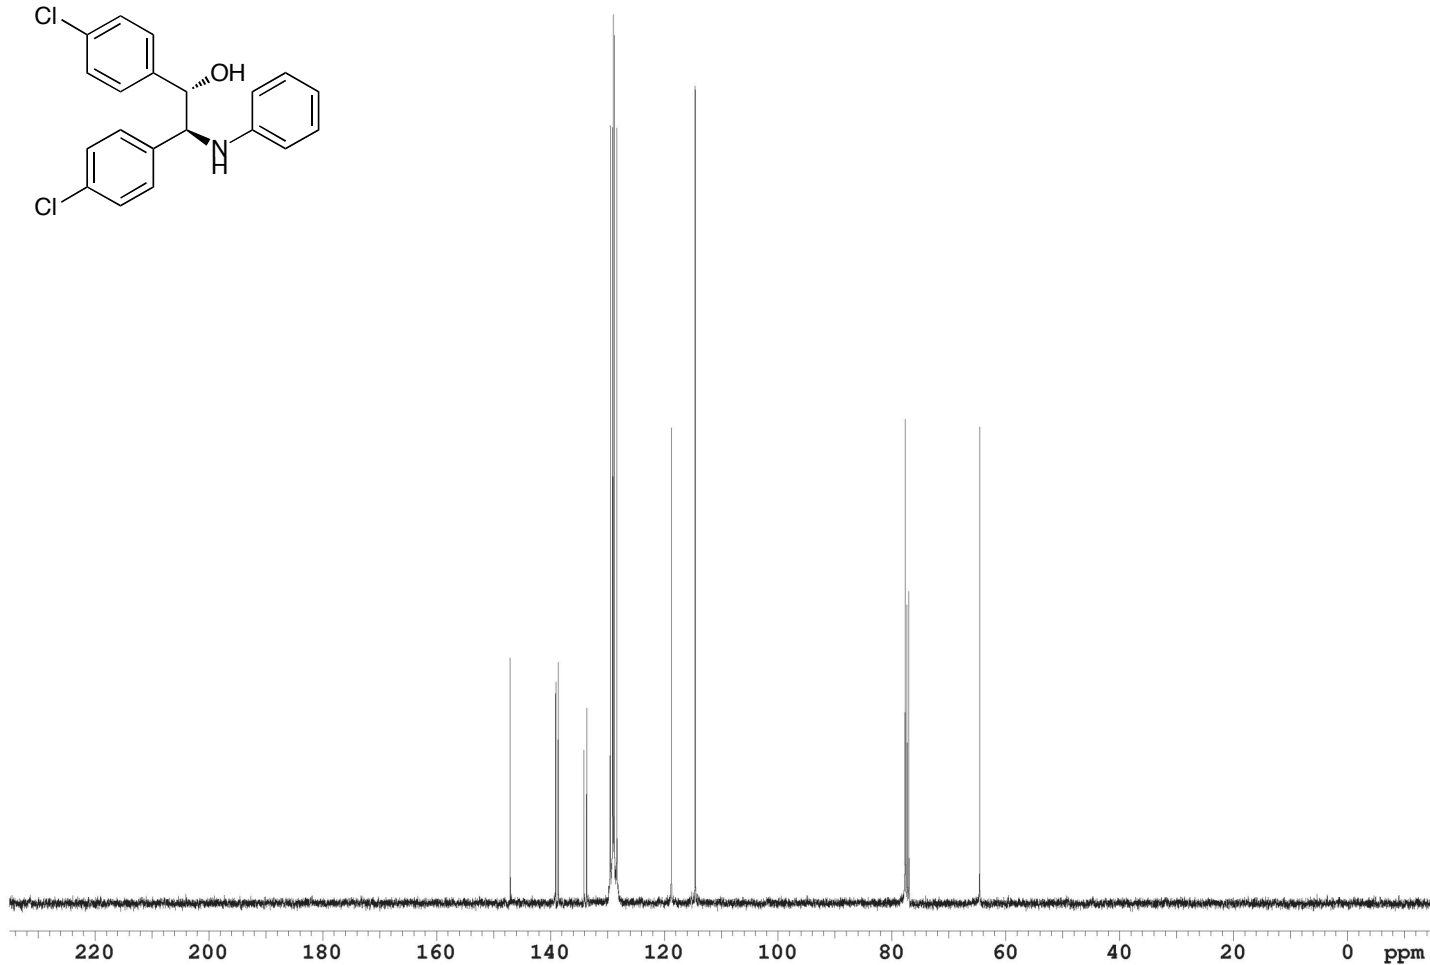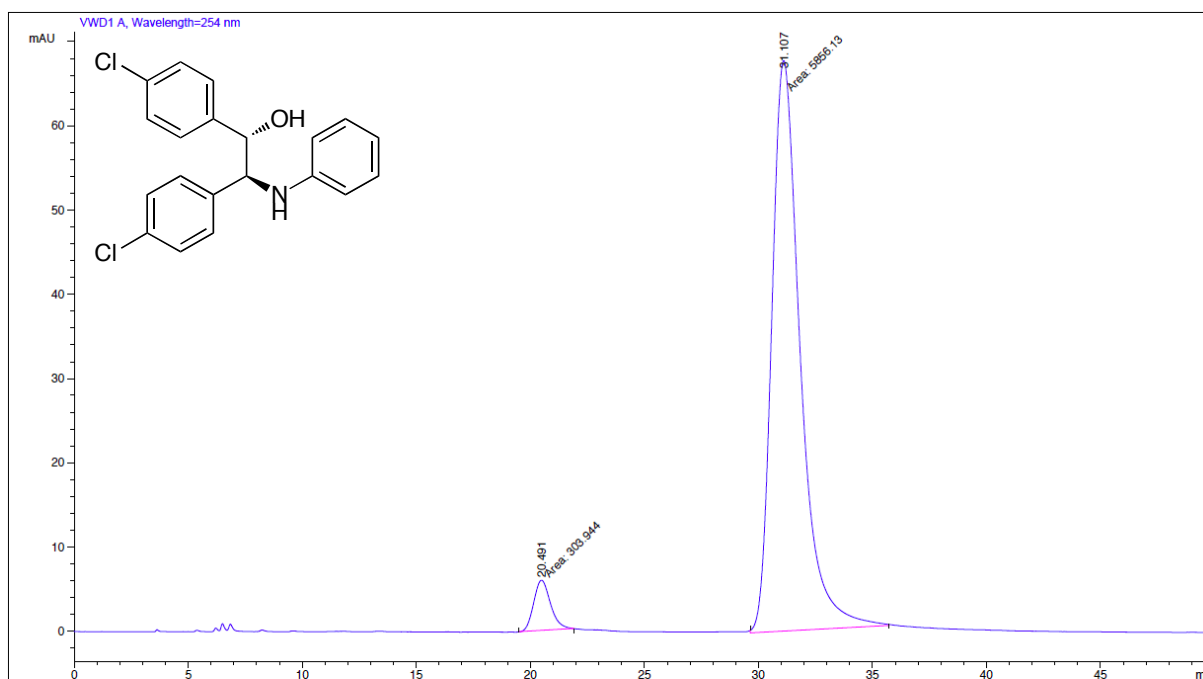

Signal 1: VWD1 A, Wavelength=254 nm

| Peak # | RetTime [min] | Type | Width [min] | Area mAU   | Area *s | Height [mAU] | Area %  |
|--------|---------------|------|-------------|------------|---------|--------------|---------|
| 1      | 20.491        | MM   | 0.8512      | 303.94446  |         | 5.95124      | 4.9341  |
| 2      | 31.107        | MM   | 1.4417      | 5856.13232 |         | 67.70043     | 95.0659 |

Totals : 6160.07678 73.65168



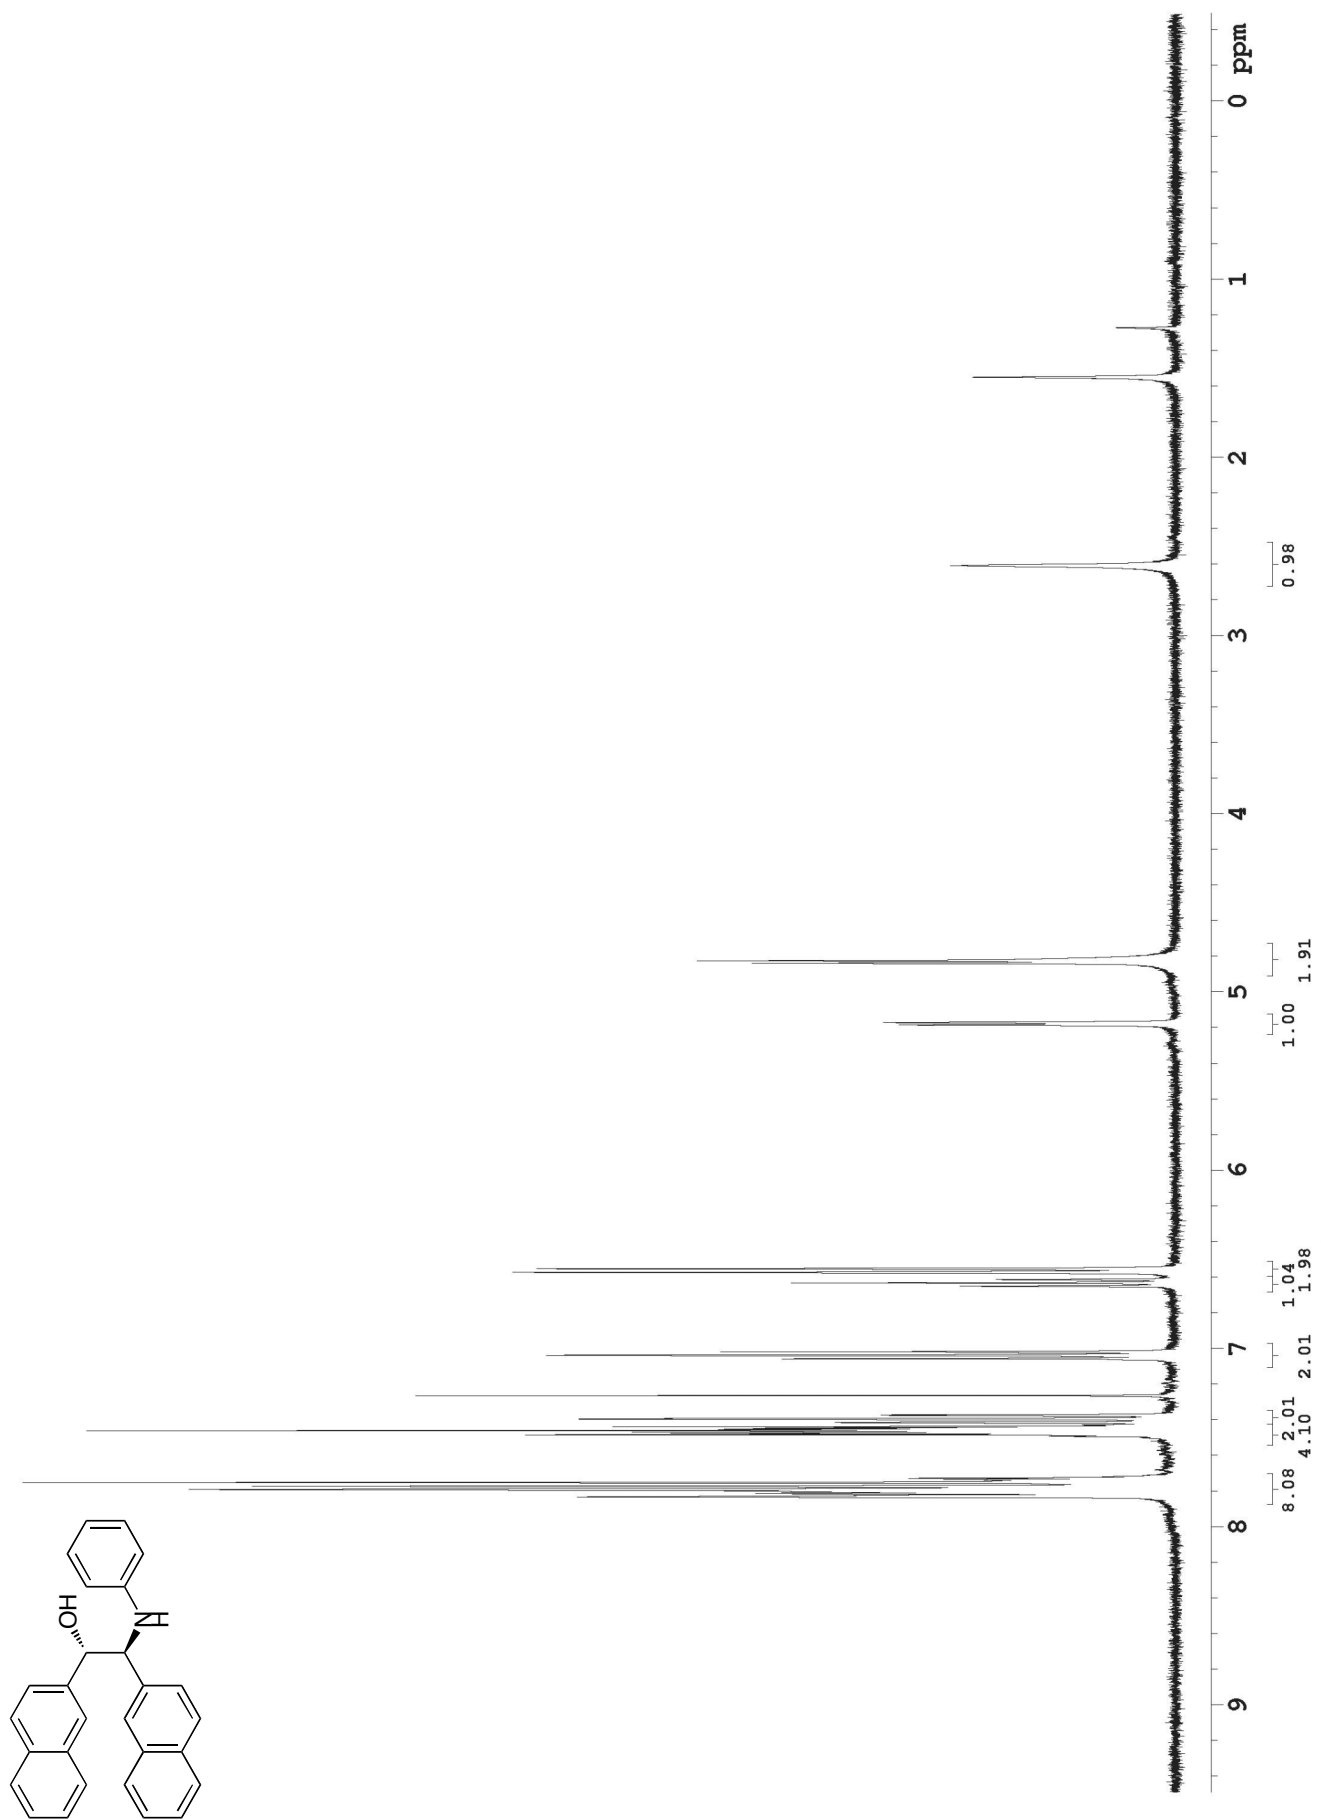

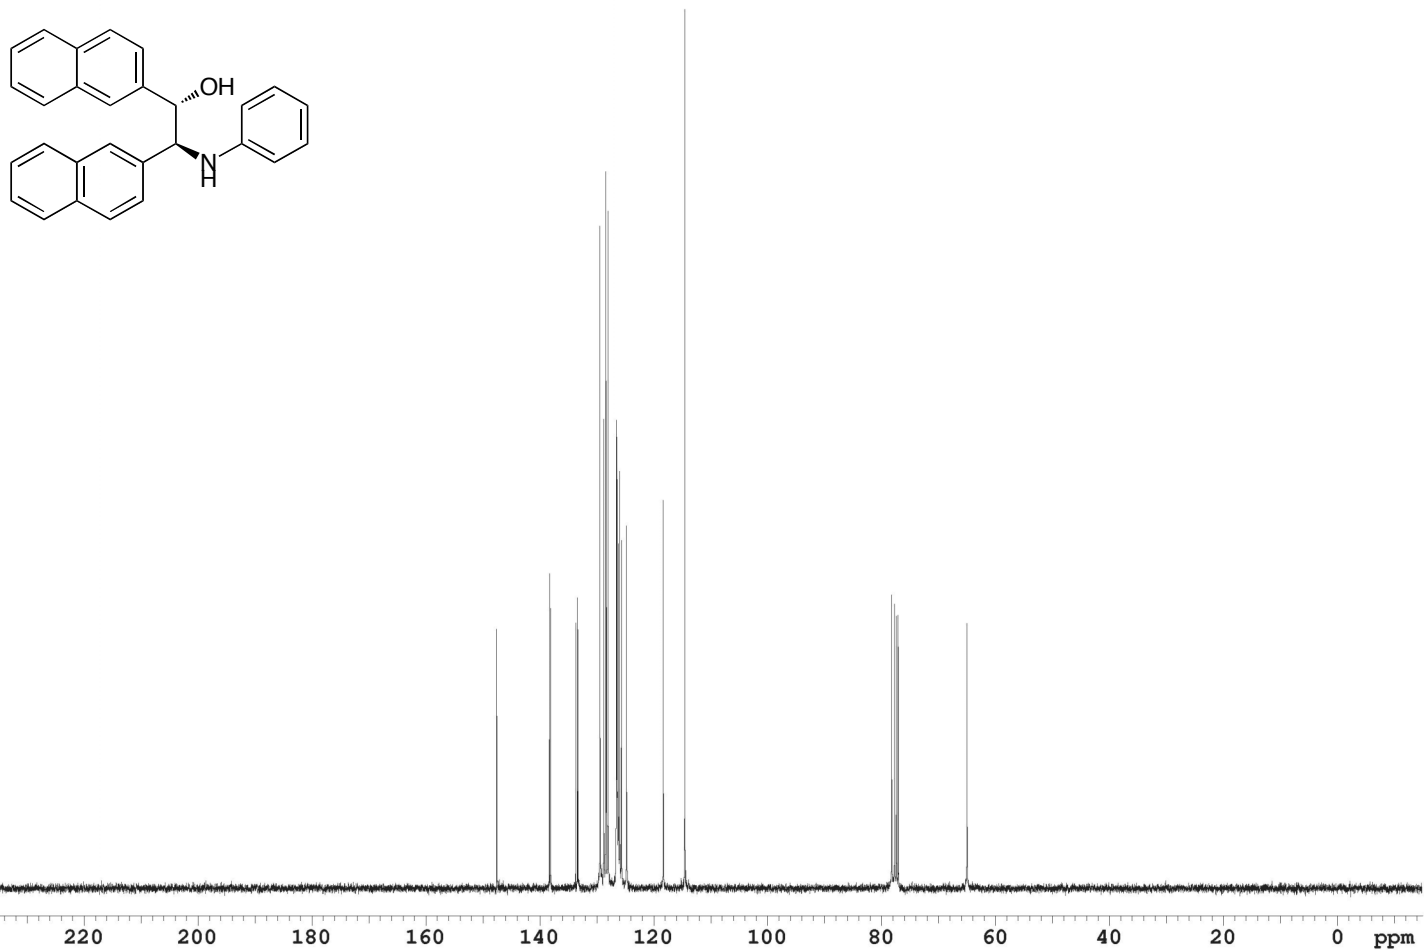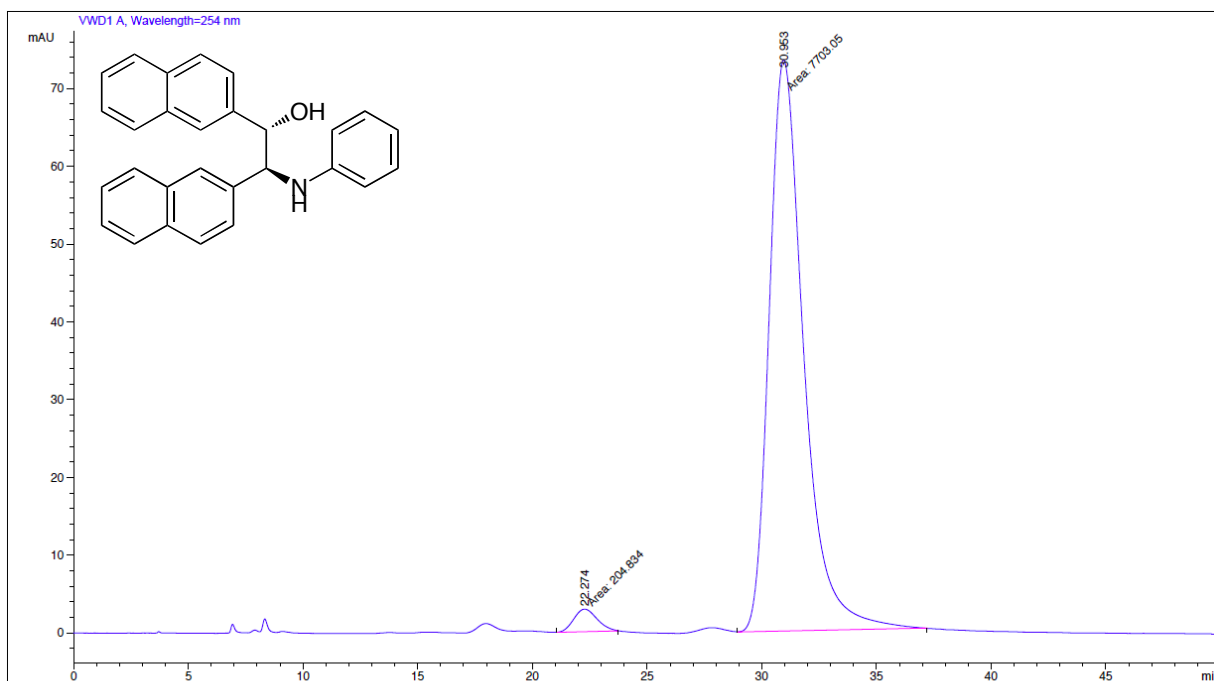

Signal 1: VWD1 A, Wavelength=254 nm

| Peak # | RetTime [min] | Type | Width [min] | Area mAU   | *s | Height [mAU] | Area %  |
|--------|---------------|------|-------------|------------|----|--------------|---------|
| 1      | 22.274        | MM   | 1.1770      | 204.83405  |    | 2.90059      | 2.5902  |
| 2      | 30.953        | MM   | 1.7483      | 7703.05469 |    | 73.43355     | 97.4098 |

Totals : 7907.88873 76.33414
